# Supplementary material
Source: PubMed Central journal article supplement (PMC7831793)
Supplement: mmc1.pdf [file mmc1.pdf]

# Supplementary to “Genome-wide Analysis of Indian SARS-CoV-2 Genomes to Identify T-cell and B-cell Epitopes from Conserved Regions based on Immunogenicity and Antigenicity”

Nimisha Ghosh<sup>a,e</sup>, Nikhil Sharma<sup>b,e</sup>, Indrajit Saha<sup>c,\*</sup>, Sudipto Saha<sup>d</sup>

<sup>a</sup>*Department of Computer Science and Information Technology, Institute of Technical Education and Research, Siksha ‘O’ Anusandhan (Deemed to be University), Bhubaneswar, Odisha, India*

<sup>b</sup>*Department of Electronics and Communication Engineering, Jaypee Institute of Information Technology, Noida, Uttar Pradesh, India*

<sup>c</sup>*Department of Computer Science and Engineering, National Institute of Technical Teachers’ Training and Research, Kolkata, West Bengal, India*

<sup>d</sup>*Division of Bioinformatics Bose Institute, Kolkata, West Bengal, India*

<sup>e</sup>*Equally contributed*

---

---

## S1. Preliminaries

### S1.1. Epitope based Vaccine

Development of vaccine is one of the most remarkable achievements of the modern era [1]. Basic concept of vaccine revolves around evoking the immune response inside host body. This can be achieved with the help of a catalyst in the form of effective micro particles which then helps in developing an adaptive immunity for curing diseases such as small pox, tuberculosis, cancer, AIDS, Alzheimer etc. [2]. With the rapid advancement in technology at molecular level, epitope based vaccine design has become very popular e.g. in case of SARS-CoV-2 [3]. This idea of epitope based vaccine works around the concept of identifying the immunodominant B-cell epitopes conjugated with T-cell epitopes for inducing specific human immune responses [4]. More details about epitope based vaccine can be found in [1, 5].

---

\*Corresponding author: indrajit@nittrkol.ac.in

### *S1.2. T-Cell Epitope Prediction*

T-cells have a marked importance in adaptive immunity. T-cells have specific receptors on their surface known as T-cell receptors which are responsible for recognising antigens when they mark their presence on the surface of antigen presenting cells (APCs) [6, 7]. The identification of T-cell epitopes evokes the cellular immune response by bounding to major histocompatibility (MHC) molecules. MHCs are the polymorphic proteins which are present in complex living organisms and are of two different categories: MHC-I and MHC-II interacting binders as CD8+ and CD4+ respectively. These MHC proteins have highly polymorphic alleles of class I human leukocyte antigens (HLA I) and class II human leukocyte antigens (HLA II). As the MHC molecules are recognised by CD8+ and CD4+ T-cells respectively, they give rise to CD8+ and CD4+ T-cell epitopes. Thus, the main aim of T-cell epitope prediction is to identify the peptides in the pathogen that can stimulate CD8+ and CD4+ T-cells. This is known as immunogenicity. Therefore, finding of optimal set of CD8+ and CD4+ T-cell epitopes is an important and challenging task. The online tools for predicting MHC-I and MHC-II T-cell epitopes are given in Table S1.

### *S1.3. B-Cell Epitope Prediction*

B-cells are also important for adaptive immunity [8]. It is important to note that T-cell stimulates B-cells with the help of T-cell receptors (TCR). In this regard, TCR on T helper cells bind to the antigen-complexed MHC II molecules on the surface of B-cell resulting in T-cell activation. This activated T-cell then provides a second activation signal to the B-cell to stimulate. B-cells invoke humoral immunity by recognising solvent-exposed antigens with the help of B-cell receptors. Once activated, B-cells secrete antibodies which evoke humoral immunity [9]. B-cell epitope is the portion of the antigen which binds to the antibodies. This is known as antigenicity. These epitopes recognized by B-cells constitute of exposed solvent regions in the antigen and are usually of different chemical nature. However, most antigens are proteins and are the targets for B-cell epitope prediction. This can be achieved through many online tools as shown in Table S2.

### *S1.4. Physico-Chemical Properties of Epitope*

The measure of therapeutic effects of a vaccine against a disease is highly dependent on the interaction among the different bio-molecules. This in turn initiates the immune response which is influenced by the physico-chemical properties of the chemical substances present on the surface of the molecules. Such physico-chemical properties are charge, polarity, aliphaticity, aromaticity, acidity, basicity, hydrophobicity, hydrophilicity,

neutrality, hydroxylicity and sulphur content of the epitopes. Hence, such molecular attributes are important to report and identify physical hazards and ecotoxicity [10]. Therefore, Pfeature server [11] is used to evaluate the physico-chemical properties of the potential T-cell (MHC-I and MHC-II restricted) and B-cell epitopes.

### *S1.5. Docking of T-cell Epitope*

A critical step in the path of epitope based vaccine design is to visualize the identified epitopes with 3D modelling to predict the optimal binding-conformation of molecule ligands to the appropriate binding site to represent a stable molecule. Hence, it is also important to evaluate the predicted epitope pairs using 3D docking during vaccine design [12]. In order to obtain a stable conformation state, a ranking procedure is adapted on the basis of scoring function which depends on the energy of the pose within the binding site. Most of the scoring functions are based on the molecular mechanisms such as solvent effect, free energy, internal rotation, association energy and free energy between ligand and receptor complex [13]. Autodock Vina [14] predicts such protein–peptide docking. AutoDock Vina consists of two main programs for docking of the ligand to a set of grids describing the target protein and for pre-calculating these grids. It also has as an improved local search routine and makes use of multicore/multi-CPU computer setups.

## **References**

- [1] M. Skwarczynski, I. Toth, Peptide-based synthetic vaccines, *Chemical Science* 7 (2015). doi:10.1039/C5SC03892H.
- [2] F. Zepp, Principles of vaccination, *Methods in molecular biology* (Clifton, N.J.) 1403 (2016) 57–84. doi:10.1007/978-1-4939-3387-7\_3.
- [3] G. Poland, I. Ovsyannikova, S. Crooke, R. Kennedy, Sars-cov-2 vaccine development: Current status, *Mayo Clinic Proceedings* 95 (10) (2020) 2172–2188. doi:https://doi.org/10.1016/j.mayocp.2020.07.021.
- [4] A. Grifoni, D. Weiskopf, S. Ramirez, J. Mateus, J. Dan, C. Moderbacher, S. Rawlings, A. Sutherland, L. Premkumar, R. Jadi, D. Marrama, A. Silva, A. Frazier, A. Carlin, J. Greenbaum, B. Peters, F. Krammer, D. Smith, S. Crotty, A. Sette, Targets of t cell responses to sars-cov-2 coronavirus in humans with covid-19 disease and unexposed individuals, *Cell* 181 (05 2020). doi:10.1016/j.cell.2020.05.015.
- [5] S. Parvizpour, M. M. Pourseif, J. R., M. A. Rafi, Y. Omid, Epitope-based vaccine design: a comprehensive overview of bioinformatics approaches, *Drug Discovery Today* 25 (6) (2020) 1034 – 1042. doi:https://doi.org/10.1016/j.drudis.2020.03.006.
- [6] I. Saha, G. Mazzocco, D. Plewczynski, Consensus classification of human leukocyte antigen class ii proteins, *Immunogenetics* 65 (2013) 97–105. doi:https://doi.org/10.1007/s00251-012-0665-6.

- [7] D. L. Farber, Form and function for t cells in health and disease, *Nature Reviews Immunology* 20 (2020) 83–84. doi:<https://doi.org/10.1038/s41577-019-0267-8>.
- [8] D. Tarlinton, B cells still front and centre in immunology, *Nature Reviews Immunology* 19 (2019) 85–86. doi:<https://doi.org/10.1038/s41577-018-0107-2>.
- [9] J. G. Cyster, C. D. Allen, B cell responses: Cell interaction dynamics and decisions, *Cell* 177 (3) (2019) 524 – 540. doi:<https://doi.org/10.1016/j.cell.2019.03.016>.
- [10] M. Sied, Filli, A. Abdalla, Ibrahim, A. Abbas, A. Morshed, K. Boakye-Yiadom, S. Kesse, M. Farooq, M. Bazezy, B. Wang, M. B. Wang, The impact of physicochemical characteristics on therapeutic efficacy of anticancer nanomaterials: A review, *International Journal of Pharmaceutical Sciences and Drug Research* 11 (03 2019). doi:[10.25004/IJPSDR.2019.110203](https://doi.org/10.25004/IJPSDR.2019.110203).
- [11] A. Pande, S. Patiyal, A. Lathwal, C. Arora, D. Kaur, A. Dhall, G. Mishra, H. Kaur, N. Sharma, S. Jain, S. Usmani, P. Agrawal, R. Kumar, V. Kumar, G. Raghava, Computing wide range of protein/peptide features from their sequence and structure, *bioRxiv* (04 2019). doi:[10.1101/599126](https://doi.org/10.1101/599126).
- [12] G. S. Krishnan, A. Joshi, V. Kaushik, T cell epitope designing for dengue peptide vaccine using docking and molecular simulation studies, *Molecular Simulation* 46 (10) (2020) 787–795. doi:[10.1080/08927022.2020.1772970](https://doi.org/10.1080/08927022.2020.1772970).
- [13] T. Pantsar, A. Poso, Binding affinity via docking: Fact and fiction, *Molecules* 23 (2018) 1899. doi:[10.3390/molecules23081899](https://doi.org/10.3390/molecules23081899).
- [14] M. A. Rauf, Ligand docking and binding site analysis with pymol and autodock/vina, *International Journal of Basic & Applied Sciences* 4 (2015) 168–177. doi:[10.14419/ijbas.v4i2.4123](https://doi.org/10.14419/ijbas.v4i2.4123).
- [15] I. Dimitrov, P. Garnev, D. Flower, I. Doytchinova, Epitop—a proteochemometric tool for mhc class ii binding prediction, *Bioinformatics (Oxford, England)* 26 (2010) 2066–8. doi:[10.1093/bioinformatics/btq324](https://doi.org/10.1093/bioinformatics/btq324).
- [16] C. Lundegaard, K. Lamberth, M. Harndahl, O. Lund, M. Nielsen, Netmhc-3.0: accurate web accessible predictions of human, mouse and monkey mhc class i affinities for peptides of length 8-11, *Nucleic Acids Res* 36 (2008) W509–W512.
- [17] I. Doytchinova, P. Guan, D. Flower, Epijen: A server for multistep t cell epitope prediction, *BMC bioinformatics* 7 (2006) 131. doi:[10.1186/1471-2105-7-131](https://doi.org/10.1186/1471-2105-7-131).
- [18] P. Dönnies, O. Kohlbacher, Svmhc: a server for prediction of mhc-binding peptides, *Nucleic acids research* 34 (2006) W194–7. doi:[10.1093/nar/gkl284](https://doi.org/10.1093/nar/gkl284).
- [19] M. Bhasin, G. Raghava, Raghava, g.: Prediction of ctl epitopes using qm, svm and ann techniques. *vaccine* 22(23-24), 3195-3204, *Vaccine* 22 (2004) 3195–204. doi:[10.1016/j.vaccine.2004.02.005](https://doi.org/10.1016/j.vaccine.2004.02.005).
- [20] P. Reche, J. P. Glutting, H. Zhang, E. Reinherz, Enhancement to the rankpep resource for the prediction of peptide binding to mhc molecules using profiles, *Immunogenetics* 56 (2004) 405–19. doi:[10.1007/s00251-004-0709-7](https://doi.org/10.1007/s00251-004-0709-7).
- [21] M. Bhasin, G. Raghava, Prediction of promiscuous and high-affinity mutated mhc binders, *Hybridoma and hybridomics* 22 (2003) 229–34. doi:[10.1089/153685903322328956](https://doi.org/10.1089/153685903322328956).
- [22] P. Guan, I. Doytchinova, C. Zygouri, D. Flower, Mhcpred: A server for quantitative prediction of peptide-mhc binding, *Nucleic acids research* 31 (2003) 3621–4. doi:[10.1093/nar/gkg510](https://doi.org/10.1093/nar/gkg510).
- [23] H. Singh, G. Raghava, Propred: prediction of hla-dr binding sites, *Bioinformatics* 17 (2001) 1236–1237. doi:[10.1093/bioinformatics/17.12.1236](https://doi.org/10.1093/bioinformatics/17.12.1236).
- [24] K. Parker, M. Bednarek, J. Coligan, Scheme for ranking potential hla-a2 binding peptides based on independent binding of individual peptide side-chains, *Journal of immunology (Baltimore, Md. : 1950)* 152 (1994) 163–75.
- [25] S. Liang, D. Zheng, B. Yao, C. Zhang, EPCES and EPSVR: Prediction of B-Cell Antigenic Epitopes on Protein Surfaces with Conformational Information, Vol. 2131, *Methods in*



- molecular biology (Clifton, N.J.), 2020. doi:10.1007/978-1-0716-0389-5\_16.
- [26] C. Zhou, Z. Chen, L. Zhang, D. Yan, T. Mao, K. Tang, T. Qiu, Z. Cao, Seppa 3.0-enhanced spatial epitope prediction enabling glycoprotein antigens, *Nucleic acids research* 47 (05 2019). doi:10.1093/nar/gkz413.
- [27] M. Jespersen, B. Peters, M. Nielsen, P. Marcatili, Bepipred-2.0: Improving sequence-based b-cell epitope prediction using conformational epitopes, *Nucleic acids research* 45 (05 2017). doi:10.1093/nar/gkx346.
- [28] W. Chen, P. Sun, Y. Lu, W. Guo, Y. X. Huang, Z. Ma, Mimopro: A more efficient web-based tool for epitope prediction using phage display libraries, *BMC bioinformatics* 12 (2011) 199. doi:10.1186/1471-2105-12-199.
- [29] N. Rubinstein, I. Mayrose, E. Martz, T. Pupko, Epitepia: A web-server for predicting b-cell epitopes, *BMC bioinformatics* 10 (2009) 287. doi:10.1186/1471-2105-10-287.
- [30] M. Sweredoski, P. Baldi, Pepito: Improved discontinuous b-cell epitope prediction using multiple distance thresholds and half sphere exposure, *Bioinformatics (Oxford, England)* 24 (2008) 1459–60. doi:10.1093/bioinformatics/btn199.
- [31] J. Ponomarenko, H. H. Bui, W. Li, N. Fusseder, P. Bourne, A. Sette, B. Peters, Ellipro: A new structure-based tool for the prediction of antibody epitopes, *BMC bioinformatics* 9 (2009) 514. doi:10.1186/1471-2105-9-514.
- [32] S. Saha, G. Raghava, Prediction methods for b-cell epitopes, *Methods in molecular biology (Clifton, N.J.)* 409 (2007) 387–94. doi:10.1007/978-1-60327-118-9\_29.

| Tool Name  | Link to the tool                                                                                                        | Predictive method                                                                          | Year | References |
|------------|-------------------------------------------------------------------------------------------------------------------------|--------------------------------------------------------------------------------------------|------|------------|
| EpiTOP     | <a href="http://www.pharmfac.net/EpiTOP">http://www.pharmfac.net/EpiTOP</a>                                             | Quantitative Matrix                                                                        | 2010 | [15]       |
| NetMHC-3.0 | <a href="http://www.cbs.dtu.dk/services/NetMHC">http://www.cbs.dtu.dk/services/NetMHC</a>                               | ANN based method and artificial neural networks                                            | 2008 | [16]       |
| EpiJen     | <a href="http://www.ddg-pharmfac.net/epijen/EpiJen/EpiJen.htm">http://www.ddg-pharmfac.net/epijen/EpiJen/EpiJen.htm</a> | Multi-step algorithm                                                                       | 2006 | [17]       |
| SVMHC      | <a href="http://www-bs.informatik.uni-tuebingen.de/SVMHC">http://www-bs.informatik.uni-tuebingen.de/SVMHC</a>           | SVM-based method                                                                           | 2006 | [18]       |
| CTLpred    | <a href="http://www.imtech.res.in/raghava/ctlpred">http://www.imtech.res.in/raghava/ctlpred</a>                         | quantitative matrix (QM), Support Vector<br>Machine (SVM), Artificial Neural Network (ANN) | 2004 | [19]       |
| RANKPEP    | <a href="http://bio.dfci.harvard.edu/RANKPEP">http://bio.dfci.harvard.edu/RANKPEP</a>                                   | PSSM                                                                                       | 2004 | [20]       |
| MMBPred    | <a href="http://www.imtech.res.in/raghava/mmbpred">http://www.imtech.res.in/raghava/mmbpred</a>                         | Quantitative matrix                                                                        | 2004 | [21]       |
| MHCPred    | <a href="http://www.ddg-pharmfac.net/mhcpred/MHCPred">http://www.ddg-pharmfac.net/mhcpred/MHCPred</a>                   | Additive method                                                                            | 2003 | [22]       |
| ProPred    | <a href="http://www.imtech.res.in/raghava/propred/">http://www.imtech.res.in/raghava/propred/</a>                       | Quantitative matrix                                                                        | 2001 | [23]       |
| BIMAS      | <a href="http://www-bimas.cit.nih.gov/molbio/hla_bind/">http://www-bimas.cit.nih.gov/molbio/hla_bind/</a>               | Published coefficient tables                                                               | 1994 | [24]       |

Table S1: List of MHC-I and MHC-II T-cell epitopes prediction servers

| Tool Name      | Server Link                                                                                                                   | Type of B-cell Epitope predicted and Method                                                         | Year | Reference |
|----------------|-------------------------------------------------------------------------------------------------------------------------------|-----------------------------------------------------------------------------------------------------|------|-----------|
| EPCES          | <a href="http://sysbio.unl.edu/EPCES/">http://sysbio.unl.edu/EPCES/</a>                                                       | Consensus Scoring                                                                                   | 2020 | [25]      |
| SEPPA 3.0      | <a href="http://lifecenter.sgst.cn/seppa/index.php">http://lifecenter.sgst.cn/seppa/index.php</a>                             | Logistic regression model                                                                           | 2019 | [26]      |
| BepiPred       | <a href="http://www.cbs.dtu.dk/services/BepiPred/">http://www.cbs.dtu.dk/services/BepiPred/</a>                               | Random Forest Algorithm                                                                             | 2017 | [27]      |
| MimoPro        | <a href="http://informatics.nenu.edu.cn/MimoPro">http://informatics.nenu.edu.cn/MimoPro</a>                                   | Mapping a number of mimotopes                                                                       | 2011 | [28]      |
| Epitopia       | <a href="http://epitopia.tau.ac.il/">http://epitopia.tau.ac.il/</a>                                                           | Naïve Bayes classifier                                                                              | 2009 | [29]      |
| BEPro (PEPITO) | <a href="http://pepito.proteomics.ics.uci.edu/">http://pepito.proteomics.ics.uci.edu/</a>                                     | A Combination of amino-acid propensity scores and half sphere exposure values at multiple distances | 2008 | [30]      |
| ElliPro        | <a href="http://tools.immuneepitope.org/tools/ElliPro/iedb_input">http://tools.immuneepitope.org/tools/ElliPro/iedb_input</a> | 3D Structure Modeling                                                                               | 2008 | [31]      |
| ABCPred        | <a href="http://www.imtech.res.in/raghava/abcpred/">http://www.imtech.res.in/raghava/abcpred/</a>                             | Artificial Neural Network                                                                           | 2006 | [32]      |

Table S2: List of B cell epitope prediction servers

| Consensus Conserved Region (CCnR)                                                                                                                                                                                                                 | Protein Sequence of CCnR                                                    | Length of CCnR | BLAST Specificity Score of CCnR | % of BLAST Specificity Score as Query Coverage | Coding Region (CR) | Starting Coordinate of CR | Ending Coordinate of CR | Length of CR | Coded Protein from CR |
|---------------------------------------------------------------------------------------------------------------------------------------------------------------------------------------------------------------------------------------------------|-----------------------------------------------------------------------------|----------------|---------------------------------|------------------------------------------------|--------------------|---------------------------|-------------------------|--------------|-----------------------|
| 4012-CACAGAAAACCTGTTACTTTATATT<br>GACATTAATGGCAATCTTCATCCAGATT<br>CTGCCACTCTTGTTAGTGACATTGACATC<br>ACTTCTTAAAGAAAGATGCTCCATATA<br>TAGTGGGTGATGTTGTTCAAGAGGGTGT<br>TTTAACTGCTGTGGTTATACCTACTAAAA<br>AGGCTGGTGGCACTACTGAAATGCTAGC<br>GAAAGCTTT-4215 | TENLLLYIDINGNLHPDSATLVSDID<br>ITFLKKDAPYIVGDVVQEGVLTAV<br>VIPTKKAGGTTEMLAKA | 204            | 377                             | 100                                            | ORF1ab             | 266                       | 21555                   | 21290        | NSP3                  |
| 10463-TTAAGGGTTCATTCCTTAATGGTTC<br>ATGTGGTAGTGTGGTTTTAACATAGATT<br>ATGACTGTGTCTCTTTTTGTAC-10539                                                                                                                                                   | KGSFLNGSCGSVGFNIDYDCVSFCY                                                   | 77             | 143                             | 100                                            | ORF1ab             | 266                       | 21555                   | 21290        | 3CL-Proteinase        |

| Consensus Conserved Region (CCnR)                                                                                                                                                                                                       | Protein Sequence of CCnR                                                    | Length of CCnR | BLAST Specificity Score of CCnR | % of BLAST Specificity Score as Query Coverage | Coding Region (CR) | Starting Coordinate of CR | Ending Coordinate of CR | Length of CR | Coded Protein from CR |
|-----------------------------------------------------------------------------------------------------------------------------------------------------------------------------------------------------------------------------------------|-----------------------------------------------------------------------------|----------------|---------------------------------|------------------------------------------------|--------------------|---------------------------|-------------------------|--------------|-----------------------|
| 13291-TTTTGTGACTTAAAAGGTAAGTATGTACAAATACCTACAACCTGTGCTAATGACCCTGTGGGTTTTACACTTAAAAACACAGTCTGTACCGTCTGCGGTAT-13391                                                                                                                       | FCDLKGKYVQIPTTCANDPVGFTLKNTVCTVCG                                           | 101            | 187                             | 100                                            | ORF1ab             | 266                       | 21555                   | 21290        | NSP10                 |
| 5307-TAACACTCCAACAAATAGAGTTGAGTTTAATCCACCTGCTCTACAAGATGCTTATTACAG-5367                                                                                                                                                                  | TLQQIELKFNPPALQDAYY                                                         | 61             | 113                             | 100                                            | ORF1ab             | 266                       | 21555                   | 21290        | NSP3                  |
| 9564-ATTCTTACCTGGTGTATTCTGTGTTACTTACTTGACTTGACATTTTATCTTACTAATGATGTTTCTTTTTAGCACATATTCA GTGGATGGTT-9657                                                                                                                                 | FLPGVYSVIYLYLTFYLTNDVSFLAHIQWMV                                             | 94             | 174                             | 100                                            | ORF1ab             | 266                       | 21555                   | 21290        | NSP4                  |
| 5220-ACACTAAAAAGTGAAAATACCCACAAGTTAATGGTTAACTTCTATTAATGGGCAGATAACAACCTGTT-5288                                                                                                                                                          | TKKWKYPQVNGLTSIKWADNNC                                                      | 69             | 128                             | 100                                            | ORF1ab             | 266                       | 21555                   | 21290        | NSP3                  |
| 17812-TTTTGGGACTACCAACTCAAACCTGTTGATTCATCAGGGCTCAGAAATATGACTATGTCATATTCACCTCAAACCA-17886                                                                                                                                                | FWDYQLKLLIHHRAQNMTMSYSLKP                                                   | 75             | 139                             | 100                                            | ORF1ab             | 266                       | 21555                   | 21290        | Helicase              |
| 23406-TGTTAACTGCACAGAAGTCCTGTGCTATTCATGCAGATCAACTTACTCCTACTTGGCGTGTATTCTACAGGTCTAATGTTTTTCAAACACGTGCAGGCTGTTAATAGGGGCTGAACATGTCAACAACCTCATATGAGTGTGACATAACCATGGTGCAGGTATATGCGCTAGTTATCAGACTCAGACTAATTCTCCTCGGCGGCACGTAGTGTAGCTAGT-23631 | VNCTEVPVAIHADQLTPTWRVYSTGSNVFQTRAGCLIGAEHVNNSEYCDIPIGAGICASYQTQTNSPRRARSVAS | 226            | 418                             | 100                                            | Spike              | 21563                     | 25385                   | 3822         | Spike glyco-protein   |

| Consensus Conserved Region (CCnR)                                                                                                                                                                                                              | Protein Sequence of CCnR                                                   | Length of CCnR | BLAST Specificity Score of CCnR | % of BLAST Specificity Score as Query Coverage | Coding Region (CR) | Starting Coordinate of CR | Ending Coordinate of CR | Length of CR | Coded Protein from CR |
|------------------------------------------------------------------------------------------------------------------------------------------------------------------------------------------------------------------------------------------------|----------------------------------------------------------------------------|----------------|---------------------------------|------------------------------------------------|--------------------|---------------------------|-------------------------|--------------|-----------------------|
| 9696-TTATATCATTGTATTCCACAAAG<br>CATTCTATTGGTTCTTTAGTAATTACCT<br>AAAGAGACGTGTAGTCTTTAATGGTGTT<br>TCCTTAGTACTTTTGAAGAAGC-9800                                                                                                                    | YIICISTKHFYWFFSNYLKRRVFN<br>GVSFSTFEE                                      | 105            | 195                             | 100                                            | ORF1ab             | 266                       | 21555                   | 21290        | NSP4                  |
| 29020-AAATCTGCTGCTGAGGCTTCTAAG<br>AAGCCTCGGCAAAAACGTACTGCCACTA<br>AAGCATAACAATGTAACACAAGCTTTCGG<br>CAGACGTGGTCCAGAACAACCCAAGG<br>AAATTTGGGGACCAGGAACATAATCAGA<br>CAAGGAAGTATTACAAACATTGGCCGC<br>AAATTGCACAATTTGCCCCAGCGCTTC<br>AGCGTTCTT-29219 | KSAAEASKKPRQKRTATKAYNVT<br>QAFGRRGPEQTQGNFGDQELIRQG<br>TDYKHWPQIAQFAPSASAF | 200            | 370                             | 100                                            | Nucleocapsid       | 28274                     | 29534                   | 1260         | Nucleocapsid protein  |
| 22948-AAACCTTTTGAGAGAGATTTCA<br>ACTGAAATCTATCAGGCCGGTAGCACAC<br>CTTGTAATGGTGTTGAAGGTTTAAATTGT<br>TACTTTCCTTTACAATCATATGGTTTCCA<br>ACCCACTAATGGTGTTGGTTACCAACC-2<br>3084                                                                        | KPFERDISTEIQAGSTPCNGVEGF<br>NCYFPLQSYGFQPTNGVGYQ                           | 137            | 254                             | 100                                            | Spike              | 21563                     | 25385                   | 3822         | Spike glyco-protein   |
| 9042-TTCTGGTAAGCCAGTACCATATTGT<br>TATGATACCAATGTACTAGAAGGTTCTG<br>TTGCTTAT-9102                                                                                                                                                                | SGKPVPCYDNTNVLEGSVAY                                                       | 61             | 113                             | 100                                            | ORF1ab             | 266                       | 21555                   | 21290        | NSP4                  |
| 16284-TGTGGTGCTGCATACGTAGACCA<br>TTCTTATGTTGTAATGTGTTACGACCA<br>TGTCATATCAACA-16349                                                                                                                                                            | VVLAYVDHSYVVNAVTTMSYQ                                                      | 66             | 122                             | 100                                            | ORF1ab             | 266                       | 21555                   | 21290        | Helicase              |

| Consensus Conserved Region (CCnR)                                                                                                                                                                                                                                                                    | Protein Sequence of CCnR                                                                        | Length of CCnR | BLAST Specificity Score of CCnR | % of BLAST Specificity Score as Query Coverage | Coding Region (CR) | Starting Coordinate of CR | Ending Coordinate of CR | Length of CR | Coded Protein from CR |
|------------------------------------------------------------------------------------------------------------------------------------------------------------------------------------------------------------------------------------------------------------------------------------------------------|-------------------------------------------------------------------------------------------------|----------------|---------------------------------|------------------------------------------------|--------------------|---------------------------|-------------------------|--------------|-----------------------|
| 6706-ACAAAGTTGTTAGTACAACACTAA<br>CATAGTTACACGGTGTAAACCGTGTT<br>GTTACTAATTATATGCCTTATTTCTTACT<br>TTATTGCTACAATTGTGTACTTTACTAG<br>AAGTACAAATTCTAGAATAAA-6839                                                                                                                                           | KVVSTTTNIVTRCLNRVCTNYMPY<br>FFLLQLCTFTRSTNSRIK                                                  | 134            | 2480                            | 100                                            | ORF1ab             | 266                       | 21555                   | 21290        | NSP3                  |
| 13041-AGAAGTGCCTGCCAATCAACTGT<br>ATTATCTTTCTGTGCTTTTGCTGTAGATG<br>CTGCTAAAGCTTACAAAGATTATCTAGC<br>TAGTGGGGGACAACCAATCACTAATTGT<br>GTTAAGATGTTGTGTACACACTGGTA<br>CTGGTCAGGCAATAACAGTTACACCGGA<br>AGCCAATATGGATCAAGAATCCTTTGGT<br>GGTGCATCGTGTGCTGTACTGCCGTTG<br>CCACATAGATCATCCAAATCCTAAAGG-I<br>3289 | EV PANSTVLSFCFAVDAAKAYKD<br>YLASGGQPITNCVKMLCTHTGTGQ<br>AITVTP EANMDQESFGGASCCLYC<br>RCHIDHPNPK | 249            | 460                             | 100                                            | ORF1ab             | 266                       | 21555                   | 21290        | NSP10                 |
| 10094-TTGAGGGTGTATGGTACAAGTAA<br>CTTGTTGGTACAACACTTAAACGGTCT<br>TTGGCTTGATGACGTAGTTACTGTCCAA<br>GACATGTGATCT-10186                                                                                                                                                                                   | EGCMVQVTCGTTTLNGLWLDVV<br>YCPRHVI                                                               | 93             | 172                             | 100                                            | ORF1ab             | 266                       | 21555                   | 21290        | 3CL-<br>Proteinase    |
| 584-CTTGCCCTCATGTGGCGAAATACC<br>AGTGGCTTACCGCAAGGTTCTTTCGTA<br>AGAACGGTAATAAAGGAGC-657                                                                                                                                                                                                               | LVPHVGEIPVAYRKVLLRKNKNGK                                                                        | 74             | 137                             | 100                                            | ORF1ab             | 266                       | 21555                   | 21290        | NSP1                  |
| 9104-AAAGTTTACGCCCTGACACACGTTA<br>TGTGCTCATGGATGGCTCTATTATCAAT<br>TTCCTAACACCTACCTTGAAGGTTCTGTT<br>AGAGTGGTAACAACCTTTGATTCTG-9211                                                                                                                                                                    | SLRPDTRYVLMDSIIQFPNTYLEG<br>SVRVVTTFDS                                                          | 108            | 200                             | 100                                            | ORF1ab             | 266                       | 21555                   | 21290        | NSP4                  |

| Consensus Conserved Region (CCnR)                                                                                | Protein Sequence of CCnR           | Length of CCnR | BLAST Specificity Score of CCnR | % of BLAST Specificity Score as Query Coverage | Coding Region (CR) | Starting Coordinate of CR | Ending Coordinate of CR | Length of CR | Coded Protein from CR       |
|------------------------------------------------------------------------------------------------------------------|------------------------------------|----------------|---------------------------------|------------------------------------------------|--------------------|---------------------------|-------------------------|--------------|-----------------------------|
| 9213-GTACTGTAGGCACGGCACTTGTGAAAGATCAGAAGCTGGTGTGTTGTATCTACTAGTGGTAGATGGGTACTTAACAATGATTATTACAGATCTTACCAGGAG-9316 | YCRHGTCESEAGVCVSTSGRWVLLNNDYYRSLPG | 104            | 193                             | 100                                            | ORF1ab             | 266                       | 21555                   | 21290        | NSP4                        |
| 13656-GTTAAGAGACACACTTTCTCTAAC TACCAACATGAAGAAACAATTTATAATTACTTAAGGATTGTCCA-13724                                | LRDTLSLTTNMKKQFIILRV               | 69             | 128                             | 100                                            | ORF1ab             | 266                       | 21555                   | 21290        | RNA-directed RNA polymerase |
| 2371-CTTGAATTTAGGTGAAACATTTGTCACGCACTCAAAGGGATTGTACAGAAAGTGTGTTAAATCCA-2435                                      | LNLGETFVTHSKGLYRKC VKS             | 65             | 121                             | 100                                            | ORF1ab             | 266                       | 21555                   | 21290        | NSP2                        |
| 21661-ACACGTGGTGTATTACCCTGACAAAGTTTCAGATCCTCAGTTTACATCAACTCAGGACTTGT-21728                                       | TRGVYYPDKVFRSSVLHSTQDL             | 68             | 126                             | 100                                            | Spike              | 21563                     | 25385                   | 3822         | Spike glycoprotein          |
| 2527-GGAAGTTGTCTTGAAAACCTGGTGATTTACAACATTAGAACAACCTACTAGTGAAGCTGTTGAAGC-2592                                     | EVVLKTGDLQPLEQPTSEAVE              | 66             | 122                             | 100                                            | ORF1ab             | 266                       | 21555                   | 21290        | NSP2                        |

Table S3: 23 Consensus Conserved Regions (CCnRs) as derived from SARS-CoV-2 with associated details

| Consensus<br>Conserved Region (CCnR)                                                                                                                                                                                                                                         | Protein Sequence                                                                       | Coded<br>Protein   | MHC-I restricted T-cell |               | MHC-II restricted T-cell |               | B-cell Epitopes |               | Final<br>Score |
|------------------------------------------------------------------------------------------------------------------------------------------------------------------------------------------------------------------------------------------------------------------------------|----------------------------------------------------------------------------------------|--------------------|-------------------------|---------------|--------------------------|---------------|-----------------|---------------|----------------|
|                                                                                                                                                                                                                                                                              |                                                                                        |                    | Binding Score           | Antigen score | Binding score            | Antigen Score | Binding Score   | Antigen Score |                |
| 4012-CACAGAAAACCTGTTACTTTATA<br>TTGACATTAATGGCAATCTTCATCCAG<br>ATTCTGCCACTCTTGTAGTGACATTG<br>ACATCACTTTCTTAAAGAAAGATGCTC<br>CATATATAGTGGGTGATGTTGTTCAAG<br>AGGGTGTTTTAACTGCTGTGGTTATAC<br>CTACTAAAAAGGCTGGTGGCACTACT<br>GAAATGCTAGCGAAAGCTTT-4215                            | TENLLLYIDINGNLHPDSATLVSDID<br>ITFLKKDAPYIVGDVVQEGVLTAV<br>VIPTKKAGGTTEMLAKA            | NSP3               | 0.8640                  | 0.7361        | 0.9804                   | 0.6382        | 0.8810          | 1             | 0.84           |
| 10463-TTAAGGGTTCATTCTTAATGGT<br>TCATGTGGTAGTGTGGTTTTAACATA<br>GATTATGACTGTGTCTCTTTTTGTTAC-<br>10539                                                                                                                                                                          | KGSFLNGSCGSVGFNIDYDCVFCY                                                               | 3CL-Proteinase     | 0.6552                  | 0.9049        | 0.9114                   | 0.7499        | 0.7143          | 0.7401        | 0.77           |
| 13291-TTTTGTGACTTAAAAGGTAAGT<br>ATGTACAAATACCTACAACCTGTGCTA<br>ATGACCCTGTGGGTTTTACACTTAAAA<br>ACACAGTCTGTACCGTCTGCGGTAT-13<br>391                                                                                                                                            | FCDLKGKYVQIPTTCANDPVGFTL<br>KNTVCTVCG                                                  | NSP10              | 0.9136                  | 0.7542        | 0.9818                   | 0.3852        | 0.9048          | 0.6813        | 0.74           |
| 5307-TAACACTCCAACAAATAGAGTTG<br>AAGTTTAATCCACCTGCTCTACAAGAT<br>GCTTATTACAG-5367                                                                                                                                                                                              | TLQQIELKFNPPALQDAYY                                                                    | NSP3               | 0.8106                  | 1             | 0.9485                   | 0.6714        | 0.3333          | 0.8433        | 0.72           |
| 9564-ATTCTTACCTGGTGTATTCTGT<br>TATTTACTTGTACTTGACATTTTATCTT<br>ACTAATGATGTTCTTTTTTAGCACAT<br>ATTCAGTGGATGGTT-9657                                                                                                                                                            | FLPGVYSVIYLYLTFYLTNDVSLA<br>HIQWMV                                                     | NSP4               | 0.9980                  | 0.7866        | 0.9933                   | 0.3326        | 0.9762          | 0.4726        | 0.70           |
| 5220-ACACTAAAAAGTGGAATACCC<br>ACAAGTTAATGGTTTAACTTCTATTAA<br>ATGGGCAGATAACAACGTGT-5288                                                                                                                                                                                       | TKKWYQPVNGLTSIKWADNNC                                                                  | NSP3               | 0.8386                  | 0.6718        | 0.7818                   | 0.4996        | 0.8095          | 0.6413        | 0.70           |
| 17812-TTTTGGGACTACCAACTCAAAC<br>TGTTGATTCATCACAGGGCTCAGAAT<br>ATGACTATGCATATCACTCAAACCA<br>-17886                                                                                                                                                                            | FWDYQLKLLIHHRAQNMTMSYSL<br>KP                                                          | Helicase           | 0.8115                  | 0.7035        | 0.9704                   | 0.4362        | 0.5476          | 0.8407        | 0.69           |
| 23406-TGTTAACTGCACAGAAGTCCTT<br>GTTGCTATTCATGCAGATCAACTTACT<br>CCTACTGGCGTGTTTATTCTACAGGT<br>TCTAATGTTTTTCAAACAGTGCAGGC<br>TGTTTAAATAGGGGCTGAACATGTCAA<br>CAACTCATATGAGTGTGACATACCCA<br>TTGGTGCAGGTATATGCGCTAGTTATC<br>AGACTCAGACTAATTCTCCTCGCGG<br>GCACGTAGTGTAGCTAGT-23631 | VNCTEVPVAIHADQLTPTWRVYST<br>GSNVFQTRAGCLIGAEHVNNSYEC<br>DIPIGAGICASYQTQNSPRRARSV<br>AS | Spike glycoprotein | 1                       | 0.4045        | 0.9559                   | 0.4993        | 0.9286          | 0.6167        | 0.69           |



| Consensus<br>Conserved Region (CCnR)                                                                                                                                                                                                                                                                   | Protein Sequence                                                                               | Coded<br>Protein     | MHC-I restricted T-cell |               | MHC-II restricted T-cell |               | B-cell Epitopes |               | Final<br>Score |
|--------------------------------------------------------------------------------------------------------------------------------------------------------------------------------------------------------------------------------------------------------------------------------------------------------|------------------------------------------------------------------------------------------------|----------------------|-------------------------|---------------|--------------------------|---------------|-----------------|---------------|----------------|
|                                                                                                                                                                                                                                                                                                        |                                                                                                |                      | Binding Score           | Antigen score | Binding score            | Antigen Score | Binding Score   | Antigen Score |                |
| 9696-TTATATCATTTTGTATTTCCACAAA<br>GCATTTCTATTGGTTCTTTAGTAATTA<br>CCTAAAGAGACGTGTAGTCTTTAATG<br>GTGTTTCCTTTAGTACTTTTGAAGAAG<br>C-9800                                                                                                                                                                   | YIICISTKHFYWFFSNYLKRRVVEN<br>GVSFSTFEE                                                         | NSP4                 | 0.9053                  | 0.9879        | 0.9952                   | 0.5285        | 0.4524          | 0.5166        | 0.69           |
| 29020-AAATCTGCTGCTGAGGCTTCTA<br>AGAAGCCTCGGCAAAAACGTACTGCC<br>ACTAAAGCATAACAATGTAACACAAGC<br>TTTCGGCAGACGTGGTCCAGAACAAA<br>CCCAAGGAAATTTGGGGACCAGGAA<br>CTAATCAGACAAGGAAGTATTACAA<br>ACATTGGCCGCAAATTGCACAATTG<br>CCCCAGCGTTCAGCGTTCTT-29219                                                           | KSAAEASKKPRQKRTATKAYNVT<br>QAFGRRGPEQTQGNFGDQELIRQG<br>TDYKHWPQIAQFAPSASAF                     | Nucleocapsid protein | 0.9950                  | 0.4810        | 0.9596                   | 0.2835        | 1               | 0.8268        | 0.69           |
| 22948-AAACCTTTTGGAGAGAGATTT<br>CAACTGAAATCTATCAGCCGGTAGC<br>ACACCTTGTAATGGTGTGAAGGTTTT<br>AATTGTACTTTCCTTTACAATCATAT<br>GGTTTCCAACCCACTAATGGTGTGGT<br>TACCAACC-23084                                                                                                                                   | KPFERDISTEIQAGSTPCNGVEGF<br>NCYFPLQSYGFQPTNGVGYQ                                               | Spike glycoprotein   | 0.8334                  | 0.4502        | 0.9485                   | 0.2781        | 0.9524          | 0.7327        | 0.64           |
| 9042-TTCTGGTAAGCCAGTACCATATT<br>GTTATGATACCAATGTACTAGAAGGT<br>TCTGTGCTTAT-9102                                                                                                                                                                                                                         | SGKPVPYCYDTNVLEGSVAY                                                                           | NSP4                 | 0.9744                  | 0.9447        | 0.8225                   | 0.6486        | 0.1905          | 0.6386        | 0.63           |
| 16284-TGTGGTGCTTGCATACGTAGAC<br>CATTCTTATGTTGTAATGCTGTTACG<br>ACCATGCATATCAACA-16349                                                                                                                                                                                                                   | VVLAYVDHSYVNVAVTMSYQ                                                                           | Helicase             | 0.8803                  | 0.5322        | 0.9963                   | 0.2949        | 0.6667          | 0.5423        | 0.61           |
| 6706-ACAAAGTTGTTAGTACAACACT<br>AACATAGTTACACGGTGTAAACCG<br>TGTTTGTACTAATTATATGCCTTATTT<br>CTTTACTTTATTGCTACAATTGTGTAC<br>TTTTACTAGAAGTACAAATCTAGAAT<br>TAAA-6839                                                                                                                                       | KVVSTTTNIVTRCLNRVCTNYMPY<br>FFILLQLCTFTRSTNSRIK                                                | NSP3                 | 0.9890                  | 0.6224        | 1                        | 0.2055        | 0.7143          | 0.3847        | 0.57           |
| 13041-AGAAGTGCCTGCCAATTCAACT<br>GTATTATCTTCTGTGCTTTTGCTGTA<br>GATGCTGCTAAAGCTTACAAAGATTA<br>TCTAGCTAGTGGGGACAACCAATCA<br>CTAATTGTGTTAAGATGTTGTGTACAC<br>ACACTGGTACTGGTCAGGCAATAACA<br>GTTACACCGGAAGCCAATATGGATCA<br>AGAATCCTTTGGTGGTGCATCGTGTG<br>TCTGTACTGCCGTTGCCACATAGATCA<br>TCCAAATCCTAAAGG-13289 | EVPANSTVLSFCFAFVDAAKAYKD<br>YLASGGQPITNCVKMLCTHTGTGQ<br>AITVTPEANMDQESFGGASCCLYC<br>RCHIDHPNPK | NSP10                | 0.9983                  | 0.4562        | 0.9956                   | 0.1602        | 0.8095          | 0.5832        | 0.57           |

| Consensus<br>Conserved Region (CCnR)                                                                                                  | Protein Sequence                       | Coded<br>Protein            | MHC-I restricted T-cell |               | MHC-II restricted T-cell |               | B-cell Epitopes |               | Final<br>Score |
|---------------------------------------------------------------------------------------------------------------------------------------|----------------------------------------|-----------------------------|-------------------------|---------------|--------------------------|---------------|-----------------|---------------|----------------|
|                                                                                                                                       |                                        |                             | Binding Score           | Antigen score | Binding score            | Antigen Score | Binding Score   | Antigen Score |                |
| 10094-TTGAGGGTTGTATGGTACAAGT<br>AACTTGTGGTACAACACTACACTTAACG<br>GTCTTTGGCTTGATGACGTAGTTTACT<br>GTCCAAGACATGTGATCT-10186               | EGCMVQVTCGTTTLNGLWDDVV<br>YCPRHVI      | 3CL-Proteinase              | 0.9124                  | 0.4365        | 0.9900                   | 0.2052        | 0.9524          | 0.4408        | 0.57           |
| 584-CTTGTCCCTCATGTGGGCGAAATA<br>CCAGTGGCTTACCGCAAGGTTCTTCTT<br>CGTAAGAACGGTAATAAAGGAGC-657                                            | LVPHVGEIPVAYRKVLLRKNKNGK               | NSP1                        | 0.9545                  | 0.5884        | 0.9596                   | 0.2460        | 0.7143          | 0.2965        | 0.55           |
| 9104-AAAGTTTACGCCCTGACACACGT<br>TATGTGCTCATGGATGGCTCTATTATT<br>CAATTTCTTAACACCTACCTTGAAGGT<br>TCTGTTAGAGTGGTAACAACTTTGAT<br>TCTG-9211 | SLRPDTRYVLMDSIIQFPNTYLEG<br>SVRVVTTFDS | NSP4                        | 0.9410                  | 0.3945        | 0.9633                   | 0.2457        | 1               | 0.2862        | 0.54           |
| 9213-GTACTGTAGGCACGGCACTTGTG<br>AAAGATCAGAAGCTGGTGTGTTGTGTA<br>TCTACTAGTGGTAGATGGGTACTTAAC<br>AATGATTATTACAGATCTTACCAGGA<br>G-9316    | YCRHGTCESEAGVCVSTSGRWVL<br>NNDYYRSLPG  | NSP4                        | 0.6165                  | 0.4960        | 0.9040                   | 0.2563        | 0.9048          | 0.3262        | 0.52           |
| 13656-GTTAAGAGACACACTTCTCTA<br>ACTACCAACATGAAGAAACAATTTAT<br>AATTTACTTAAGGATTGTCCA-13724                                              | LRDTLSLTTNMKKQFIIYLIV                  | RNA-directed RNA polymerase | 0.7707                  | 0.6230        | 0.9485                   | 0.6014        | 0.1667          | 0.4223        | 0.52           |
| 2371-CTTGAATTTAGGTGAAACATTTG<br>TCACGCACTCAAAGGGATTGTACAGA<br>AAGTGTGTTAAATCCA-2435                                                   | LNLGETFVTHSKGLYRKC VKS                 | NSP2                        | 0.8932                  | 0.2400        | 0.8707                   | 0.2500        | 0.7143          | 0.3765        | 0.48           |
| 21661-ACACGTGGTGTATTACCCTGA<br>CAAAGTTTTCAGATCCTCAGTTTACA<br>TCAACTCAGGACTTGT-21728                                                   | TRGVYYPDKVFRSSVLHSTQDL                 | Spike glycoprotein          | 0.7867                  | 0.2226        | 0.9448                   | 0.3253        | 0.5476          | 0.2437        | 0.44           |
| 2527-GGAAGTGTCTTGAAAACCTGGTG<br>ATTTACAACCATTAGAACAACCTACT<br>AGTGAAGCTGTGAAGC-2592                                                   | EVVLKTGDLQPLEQPTSEAVE                  | NSP2                        | 0.6067                  | 0.6804        | 0.1112                   | 0.6341        | 0.5714          | 0.4222        | 0.44           |

Table S4: Ranking procedure done on the basis of Geometric Mean of Binding and Antigenic Scores of T-cell and B-cell epitopes from each CCnR

| Protein Sequence                                                                        | Coded Proteins            | Type        | MHC-I restricted T-cell |                |                 |              | MHC-II restricted T-cell |                           |                 |              | B-cell           |                 |              |
|-----------------------------------------------------------------------------------------|---------------------------|-------------|-------------------------|----------------|-----------------|--------------|--------------------------|---------------------------|-----------------|--------------|------------------|-----------------|--------------|
|                                                                                         |                           |             | Epitope                 | Alleles        | Scaled Score of |              | Epitope                  | Alleles                   | Scaled Score of |              | Epitope          | Scaled Score of |              |
|                                                                                         |                           |             |                         |                | Immunogenicity  | Antigenicity |                          |                           | Immunogenicity  | Antigenicity |                  | Immunogenicity  | Antigenicity |
| TENLLLYIDINGN<br>LHPDSATLVSDIDI<br>TFLKKDAPYIVGD<br>VVQEGVLTAVVIP<br>TKKAGGTTEMLA<br>KA | NSP3                      | Immunogenic | FLKKDAPYI               | HLA-A*31:01    | 0.8640          | 0.3890       | ITFLKKDAPYIVGDV          | HLA-DRB3*01:01            | 0.9779          | 0.5536       | TLVSDIDITFLKKDAP | 0.8809          | 0.7313       |
|                                                                                         |                           | Antigenic   | TAVVIPTKK               | HLA-A*68:01    | 0.8311          | 0.7361       | IDITFLKKDAPYIVG          | HLA-DRB3*01:01            | 0.9766          | 0.8882       | LHPDSATLVSDIDITF | 0.5238          | 0.7401       |
| KGSFLNGSCGSV<br>GFNIDYDCVDFCY                                                           | 3CL-Proteinase            | Immunogenic | FLNGSCGSV               | HLA-A*02:03    | 0.6552          | 0.3342       | CGSVGFNIDYDCVSF          | HLA-DQA1*01:01            | 0.900375156     | 1            | CGSVGFNIDYDCVSFC | 0.7142          | 1            |
|                                                                                         |                           | Antigenic   | GSVGFNIDY               | HLA-A*30:02    | 0.2299          | 0.9049       |                          |                           |                 |              |                  |                 |              |
| FCDLKGKYVQIPT<br>TCANDPVGFTLK<br>NTVCTVCG                                               | NSP10<br><br>glycoprotein | Immunogenic | DLKGKYVQI               | HLA-B*08:01    | 0.9136          | 0.7542       | KGKYVQIPTTCANDP          | HLA-DRB1*04:01            | 0.9818          | 0.1892       | TTCANDPVGFTLKNTV | 0.9048          | 0.6813       |
|                                                                                         |                           | Antigenic   | DLKGKYVQIPTCAN          | HLA-DRB1*04:01 |                 |              |                          |                           | 0.9815          | 0.3852       |                  |                 |              |
| TLQQIELKFNPPA<br>LQDAYY                                                                 | NSP3                      | Immunogenic | NPPALQDAY               | HLA-B*35:01    | 0.8106          | 0.4557       | QIELKFNPPALQDAY          | HLA-DRB3*02:02            | 0.9485          | 0.6409       | LQQIELKFNPPALQDA | 0.3333          | 0.8433       |
|                                                                                         |                           | Antigenic   | IELKFNPPAL              | HLA-B*40:01    | 0.5146          | 1            | IELKFNPPALQDAYY          | HLA-DRB3*02:02            | 0.9448          | 0.6714       |                  |                 |              |
| FLPGVYSVIYLYL<br>TFYLTNDVSLAH<br>IQWMV                                                  | NSP4                      | Immunogenic | VSFLAHIQW               | HLA-B*57:01    | 0.9980          | 0.7866       | GVYSVIYLYLTFYLT          | HLA-DPA1*01:03/DPB1*02:01 | 0.9933          | 0.3326       | YSVIYLYLTFYLTNDV | 0.9762          | 0.4726       |
|                                                                                         |                           | Antigenic   |                         |                |                 |              |                          |                           |                 |              |                  |                 |              |
| TKKWYQPQVNGL<br>TSIKWADNNC                                                              | NSP3                      | Immunogenic | QVNGLTSIKW              | HLA-B*57:01    | 0.8386          | 0.6718       | PQVNGLTSIKWADNN          | HLA-DQA1*01:02/DQB1*06:02 | 0.7818          | 0.4667       | KYPQVNGLTSIKWADN | 0.8095          | 0.6413       |
|                                                                                         |                           | Antigenic   |                         |                |                 |              | KYPQVNGLTSIKWAD          | HLA-DQA1*01:02/DQB1*06:02 | 0.7595          | 0.4996       |                  |                 |              |
| FWDYQLKLLIHH<br>RAQNMTMSYSLK<br>P                                                       | Helicase                  | Immunogenic | RAQNMTMSY               | HLA-A*30:02    | 0.8115          | 0.7035       | YQLKLLIHHRAQNMT          | HLA-DRB4*01:01            | 0.9704          | 0.3655       | FWDYQLKLLIHHRAQN | 0.5476          | 0.6379       |
|                                                                                         |                           | Antigenic   |                         |                |                 |              | DYQLKLLIHHRAQNM          | HLA-DRB4*01:02            | 0.9692          | 0.4362       | IHHRAQNMTMSYSLKP | 0.3571          | 0.8407       |

| Protein Sequence                                                                                | Coded Proteins              | Type                         | MHC-I restricted T-cell    |                                |                      |                      | MHC-II restricted T-cell               |                                                            |                      |                      | B-cell                                   |                      |                      |
|-------------------------------------------------------------------------------------------------|-----------------------------|------------------------------|----------------------------|--------------------------------|----------------------|----------------------|----------------------------------------|------------------------------------------------------------|----------------------|----------------------|------------------------------------------|----------------------|----------------------|
|                                                                                                 |                             |                              | Epitope                    | Alleles                        | Scaled Score of      |                      | Epitope                                | Alleles                                                    | Scaled Score of      |                      | Epitope                                  | Scaled Score of      |                      |
|                                                                                                 |                             |                              |                            |                                | Immunogenicity       | Antigenicity         |                                        |                                                            | Immunogenicity       | Antigenicity         |                                          | Immunogenicity       | Antigenicity         |
| VNCTEVPVAIHA<br>DQLTPTWRVYST<br>GSNVFQTRAGCLI<br>GAEHVNNSYECD<br>IPIGAGICASYQTQ<br>TNSPRRARSVAS | Spike<br><br>glycoprotein   | Immunogenic<br><br>Antigenic | HADQLTPTW                  | HLA-B*58:01                    | 1                    | 0.4045               | DIPIGAGICASYQTQ                        | HLA-DQA1*05:01/DQB1*03:01                                  | 0.9559               | 0.4993               | GCLIGAEHVNNSYECD                         | 0.9286               | 0.6167               |
| YIICISTKHFYWFF<br>SNYLKRRVVFNG<br>VSFSTFEE                                                      | NSP4                        | Immunogenic<br><br>Antigenic | ICISTKHFYW                 | HLA-B*57:01                    | 0.9053               | 0.9879               | KHFYWFFSNYLKRRV<br><br>TKHFYWFFSNYLKRR | HLA-DPA1*01:03/DPB1*04:01<br><br>HLA-DPA1*01:03/DPB1*04:01 | 0.9952<br><br>0.9937 | 0.4352<br><br>0.5285 | ISTKHFYWFFSNYLKR                         | 0.4524               | 0.5166               |
| KSAAEASKKPRQ<br>KRTATKAYNVQ<br>AFGRRGPEQTQG<br>NFGDQELIRQGTD<br>YKHWPQIAQFAP<br>SASAF           | Nucleocapsid<br><br>protein | Immunogenic<br><br>Antigenic | AQFAPSASAF                 | HLA-B*15:01                    | 0.9950               | 0.4810               | ATKAYNVQAFGRR<br><br>KAYNVQAFGRRGP     | HLA-DRB5*01:01<br><br>HLA-DRB5*01:01                       | 0.9596<br><br>0.9522 | 0.1756<br><br>0.2835 | KSAAEASKKPRQKRTA<br><br>GRRGPEQTQGNFGDQE | 1<br><br>0.8268      | 0.4085<br><br>0.8268 |
| KPFERDISTEIQ<br>GSTPCNGVEGFN<br>CYFPLQSYGFQPT<br>NGVGYQ                                         | Spike<br><br>glycoprotein   | Immunogenic<br><br>Antigenic | FERDISTEI<br><br>YFPLQSYGF | HLA-B*40:01<br><br>HLA-A*24:02 | 0.8334<br><br>0.7813 | 0.0097<br><br>0.4502 | VEGFNCYFPLQSYG<br><br>NGVEGFNCYFPLQSY  | HLA-DQA1*01:01/DQB1*05:01<br><br>HLA-DRB3*01:01            | 0.9485<br><br>0.9263 | 0.1916<br><br>0.2781 | GSTPCNGVEGFNCYFP<br><br>EGFNCYFPLQSYGFQ  | 0.9524<br><br>0.5238 | 0.2921<br><br>0.7327 |
| SGKVPYCYDTN<br>VLEGSVAY                                                                         | NSP4                        | Immunogenic<br><br>Antigenic | NVLEGSVAY<br><br>SGKVPYCY  | HLA-B*35:01<br><br>HLA-A*30:02 | 0.9744<br><br>0.6585 | 0.3830<br><br>0.9447 | PVPYCYDTNVLEGSV<br><br>GKVPYCYDTNVLEG  | HLA-DRB1*04:01<br><br>HLA-DRB1*04:01                       | 0.8225<br><br>0.7188 | 0.4408<br><br>0.6486 | SGKVPYCYDTNVLEG                          | 0.1904               | 0.6385               |
| VVLAYVDHSYVV<br>NAVTTMSYQ                                                                       | Helicase<br><br>protein     | Immunogenic<br><br>Antigenic | VLAYVDHSY                  | HLA-B*15:01                    | 0.8803               | 0.5322               | VDHSYVVNAVTTMSY                        | HLA-DRB3*02:02                                             | 0.9958               | 0.5449               | LAYVDHSYVVNAVTTM                         | 0.6667               | 0.5422               |
| KVVSTTNIVTRC<br>LNRVCTNYMPYF<br>FTLLQLCTFTRS<br>TNSRIK                                          | NSP3                        | Immunogenic                  | NYMPYFFTL                  | HLA-A*24:02                    | 0.9890               | 0.6224               | CTNYMPYFFTLQL                          | HLA-DPA1*03:01                                             | 0.042                | 0.2206               | VCTNYMPYFFTLQL                           | 0.7142               | 0.3847               |

| Protein Sequence                                                                                           | Coded Proteins                 | Type        | MHC-I restricted T-cell |             |                 |              | MHC-II restricted T-cell |                           |                 |              | B-cell            |                 |              |
|------------------------------------------------------------------------------------------------------------|--------------------------------|-------------|-------------------------|-------------|-----------------|--------------|--------------------------|---------------------------|-----------------|--------------|-------------------|-----------------|--------------|
|                                                                                                            |                                |             | Epitope                 | Alleles     | Scaled Score of |              | Epitope                  | Alleles                   | Scaled Score of |              | Epitope           | Scaled Score of |              |
|                                                                                                            |                                |             |                         |             | Immunogenicity  | Antigenicity |                          |                           | Immunogenicity  | Antigenicity |                   | Immunogenicity  | Antigenicity |
|                                                                                                            |                                | Antigenic   |                         |             |                 |              |                          |                           |                 |              |                   |                 |              |
| EVPANSTVLSFCA<br>FAVDAAKAYKDY<br>LASGGQPITNCVK<br>MLCTHTGTGQAI<br>TVTPEANMDQES<br>FGGASCCLYCRC<br>HIDHPNPK | NSP10                          | Immunogenic | FAVDAAKAY               | HLA-B*35:01 | 0.9983          | 0.3296       | LSFCAFAVDAAKAYK          | HLA-DRB3*01:01            | 0.9949          | 0.4102       | GTGQAITVTPEANMDQ  | 0.8095          | 0.3635       |
|                                                                                                            |                                | Antigenic   | VPANSTVLSF              | HLA-B*35:01 | 0.7694          | 0.4562       |                          |                           |                 |              | KMLCTHTGTGQAITVT  | 0.6905          | 0.5832       |
| EGCMVQVTCGTT<br>TLNGLWLDDVVY<br>CPRHVI                                                                     | 3CL-Proteinase                 | Immunogenic | GTTLNGLW                | HLA-B*57:01 | 0.9124          | 0.4365       | TTTLNGLWLDDVVYC          | HLA-DQA1*01:01/DQB1*05:01 | 0.9900          | 0.0948       | QVTCGTTTLNGLWLDD  | 0.9523          | 0.4408       |
|                                                                                                            |                                | Antigenic   |                         |             |                 |              | TLNGLWLDDVVYCPR          | HLA-DQA1*01:01/DQB1*05:01 | 0.9878          | 0.2052       |                   |                 |              |
| LVPHVGEIPVAYR<br>KVLLRKNGKNGK                                                                              | NSP1                           | Immunogenic | HVGEIPVAY               | HLA-B*15:01 | 0.9545          | 0.4960       | VAYRKVLLRKNGKNGK         | HLA-DRB1*11:01            | 0.9596          | 0.1695       | PHVGEIPVAYRKVLLR  | 0.7142          | 0.2965       |
|                                                                                                            |                                | Antigenic   | HVGEIPVAYR              | HLA-A*68:01 | 0.9445          | 0.5884       | IPVAYRKVLLRKNGN          | HLA-DRB1*11:01            | 0.9226          | 0.2460       |                   |                 |              |
| SLRPDTRYVLM<br>GSIIQFPNTYLEGS<br>VRVVTTFDS                                                                 | NSP4                           | Immunogenic | RPDTRYVLM               | HLA-B*07:02 | 0.9410          | 0.3945       | LMDGSIIQFPNTYLE          | HLA-DRB1*15:01            | 0.9587          | 0.2456       | GSIIQFPNTYLEGSVR  | 1               | 0.1195       |
|                                                                                                            |                                | Antigenic   |                         |             |                 |              |                          |                           |                 |              | LRPDTRYVLMDSIIQ   | 0.3334          | 0.2861       |
| YCRHGTCEERSEA<br>GVCVSTSGRWV<br>NNDYYRSLPG                                                                 | NSP4                           | Immunogenic | VCVSTSGRW               | HLA-B*57:01 | 0.6165          | 0.4960       | TSGRWVLLNNDYYRSL         | HLA-DRB3*02:02            | 0.9040          | 0.2219       | YCRHGTCEERSEAGVCV | 0.9048          | 0.3262       |
|                                                                                                            |                                | Antigenic   |                         |             |                 |              | STSGRWVLLNNDYYRS         | HLA-DRB3*02:02            | 0.8225          | 0.2563       |                   |                 |              |
| LRDTLSLTTNMK<br>KQFIYLRIV                                                                                  | RNA-directed<br>RNA polymerase | Immunogenic | DTLSLTTNMK              | HLA-A*68:01 | 0.7707          | 0.5758       | TTNMKKQFIYLRIV           | HLA-DPA1*02:01            | 0.942           | 0.6014       | LNLGETFVTHSKGLYR  | 0.7142          | 0.3765       |
|                                                                                                            |                                | Antigenic   | LSLTTNMKK               | HLA-A*11:01 | 0.5274          | 0.6230       |                          |                           |                 |              |                   |                 |              |
| LNLGETFVTHSKG<br>LYRKCVKS                                                                                  | NSP2                           | Immunogenic | VTHSKGLYR               | HLA-A*31:01 | 0.8932          | 0.2331       | ETFVTHSKGLYRKCV          | HLA-DRB5*01:01            | 0.8707          | 0.0966       | LNLGETFVTHSKGLYR  | 0.7142          | 0.3765       |
|                                                                                                            |                                | Antigenic   | VTHSKGLYRK              | HLA-A*03:01 | 0.699           | 0.24         | LGETFVTHSKGLYRK          | HLA-DRB5*01:01            | 0.8522          | 0.25         |                   |                 |              |
| TRGVYYPDKVFR<br>SSVLHSTQDL                                                                                 | Spike<br>glycoprotein          | Immunogenic | VYYPDKVFR               | HLA-A*31:01 | 0.7867          | 0.2018       | TRGVYYPDKVFRSSV          | HLA-DRB1*03:01            | 0.9378          | 0.3252       | RGVYYPDKVFRSSVLH  | 0.5476          | 0.2437       |
|                                                                                                            |                                | Antigenic   | GVYYPDKVFR              | HLA-A*31:01 | 0.6607          | 0.2226       |                          |                           |                 |              |                   |                 |              |

| Protein Sequence         | Coded Proteins | Type        | MHC-I restricted T-cell |             |                 |              | MHC-II restricted T-cell |                           |                 |              | B-cell           |                 |              |
|--------------------------|----------------|-------------|-------------------------|-------------|-----------------|--------------|--------------------------|---------------------------|-----------------|--------------|------------------|-----------------|--------------|
|                          |                |             | Epitope                 | Alleles     | Scaled Score of |              | Epitope                  | Alleles                   | Scaled Score of |              | Epitope          | Scaled Score of |              |
|                          |                |             |                         |             | Immunogenicity  | Antigenicity |                          |                           | Immunogenicity  | Antigenicity |                  | Immunogenicity  | Antigenicity |
| EVVLTGDLQPL<br>EQPTSEAVE | NSP2           | Immunogenic | LEQPTSEAV               | HLA-B*40:01 | 0.6067          | 0.1310       | GDLQPLEQPTSEAVE          | HLA-DQA1*03:01/DQB1*03:02 | 0.1112          | 0.4601       | TGDLQPLEQPTSEAVE | 0.5714          | 0.4221       |
|                          |                | Antigenic   | EVVLTGDL                | HLA-A*26:01 | 0               | 0.6804       | EVVLTGDLQPLEQP           | HLA-DRB1*08:02            | 0.0371          | 0.6341       |                  |                 |              |

Table S5: List of Immunogenic and Antigenic Epitopes for MHC-I, MHC-II restricted T-cell and B-cell Epitopes

| Particulars                                                                                         | Link                                                                                                                                                                                                                                                  |
|-----------------------------------------------------------------------------------------------------|-------------------------------------------------------------------------------------------------------------------------------------------------------------------------------------------------------------------------------------------------------|
| Details related to 125 CCnRs, 92 MHC-I and MHC-II restricted T-cell epitopes and 61 B-cell epitopes | <a href="http://www.nittrkol.ac.in/indrajit/projects/COVID-EpitopeVaccine-India/downloads/supplementary/Epitope-Details.xlsx">http://www.nittrkol.ac.in/indrajit/projects/COVID-EpitopeVaccine-India/downloads/supplementary/Epitope-Details.xlsx</a> |
| List of proposed epitopes from literature                                                           | <a href="http://www.nittrkol.ac.in/indrajit/projects/COVID-EpitopeVaccine-India/downloads/supplementary/AllPaperSummary.xlsx">http://www.nittrkol.ac.in/indrajit/projects/COVID-EpitopeVaccine-India/downloads/supplementary/AllPaperSummary.xlsx</a> |

Table S6: Link of Supplementary excel files

| MHC-I restricted T-cell Epitopes | Positively charged | Negatively charged | Polarity | Non Polarity | Aliphaticity | Aromaticity | Acidity | Basicity | Hydrophobicity | Hydrophilicity | Neutral | Hydroxylic | Sulphur Content |
|----------------------------------|--------------------|--------------------|----------|--------------|--------------|-------------|---------|----------|----------------|----------------|---------|------------|-----------------|
| FLKKDAPYI                        | 0.222              | 0.111              | 0.111    | 0.556        | 0.444        | 0.222       | 0.111   | 0.222    | 0.556          | 0.333          | 0.111   | 0          | 0               |
| TAVVIPTKK                        | 0.222              | 0                  | 0.222    | 0.556        | 0.556        | 0           | 0       | 0.222    | 0.778          | 0.333          | 0.222   | 0.222      | 0               |
| FLNGSCGSV                        | 0                  | 0                  | 0.333    | 0.556        | 0.444        | 0.111       | 0       | 0        | 0.444          | 0.111          | 0.444   | 0.222      | 0.111           |
| GSVGFNIDY                        | 0                  | 0.111              | 0.222    | 0.556        | 0.444        | 0.222       | 0.111   | 0        | 0.333          | 0.111          | 0.444   | 0.111      | 0               |
| DLKGKYVQI                        | 0.222              | 0.111              | 0.222    | 0.444        | 0.444        | 0.111       | 0.111   | 0.222    | 0.333          | 0.222          | 0.333   | 0          | 0               |
| NPPALQDAY                        | 0                  | 0.111              | 0.222    | 0.556        | 0.556        | 0.111       | 0.111   | 0        | 0.556          | 0.333          | 0.222   | 0          | 0               |
| IELKFNPPAL                       | 0.1                | 0.1                | 0        | 0.7          | 0.6          | 0.1         | 0.1     | 0.1      | 0.7            | 0.4            | 0.1     | 0          | 0               |
| VSFLAHIQW                        | 0.111              | 0                  | 0.222    | 0.667        | 0.444        | 0.222       | 0       | 0.111    | 0.667          | 0.111          | 0.222   | 0.111      | 0               |
| QVNGLSIKW                        | 0.1                | 0                  | 0.3      | 0.5          | 0.4          | 0.1         | 0       | 0.1      | 0.5            | 0.2            | 0.4     | 0.2        | 0               |
| RAQNMTMSY                        | 0.111              | 0                  | 0.444    | 0.333        | 0.111        | 0.111       | 0       | 0.111    | 0.444          | 0.222          | 0.333   | 0.222      | 0.222           |
| HADQLTPTW                        | 0.111              | 0.111              | 0.333    | 0.444        | 0.333        | 0.111       | 0.111   | 0.111    | 0.667          | 0.222          | 0.444   | 0.222      | 0               |
| ICISTKHFYW                       | 0.2                | 0                  | 0.4      | 0.4          | 0.2          | 0.3         | 0       | 0.2      | 0.6            | 0.2            | 0.2     | 0.2        | 0.1             |
| AQFAPSASAF                       | 0                  | 0                  | 0.3      | 0.7          | 0.5          | 0.2         | 0       | 0        | 0.7            | 0.1            | 0.3     | 0.2        | 0               |
| FERDISTEI                        | 0.111              | 0.333              | 0.222    | 0.333        | 0.222        | 0.111       | 0.333   | 0.111    | 0.444          | 0.111          | 0.556   | 0.222      | 0               |
| YFPLQSYGF                        | 0                  | 0                  | 0.444    | 0.556        | 0.333        | 0.444       | 0       | 0        | 0.444          | 0.111          | 0.333   | 0.111      | 0               |
| NVLEGSVAY                        | 0                  | 0.111              | 0.222    | 0.556        | 0.556        | 0.111       | 0.111   | 0        | 0.444          | 0.111          | 0.333   | 0.111      | 0               |
| SGKPVPCY                         | 0.111              | 0                  | 0.444    | 0.444        | 0.444        | 0.222       | 0       | 0.111    | 0.444          | 0.333          | 0.222   | 0.111      | 0.111           |
| VLAYVDHSY                        | 0.111              | 0.111              | 0.333    | 0.444        | 0.444        | 0.222       | 0.111   | 0.111    | 0.444          | 0.111          | 0.222   | 0.111      | 0               |
| NYMPYFFTL                        | 0                  | 0                  | 0.333    | 0.556        | 0.222        | 0.444       | 0       | 0        | 0.667          | 0.222          | 0.111   | 0.111      | 0.111           |
| FAVDAAKAY                        | 0.111              | 0.111              | 0.111    | 0.667        | 0.556        | 0.222       | 0.111   | 0.111    | 0.667          | 0.111          | 0.111   | 0          | 0               |
| VPANSTVLSF                       | 0                  | 0                  | 0.3      | 0.6          | 0.5          | 0.1         | 0       | 0        | 0.7            | 0.2            | 0.3     | 0.3        | 0               |
| GTTLNGLW                         | 0                  | 0                  | 0.333    | 0.556        | 0.444        | 0.111       | 0       | 0        | 0.667          | 0.111          | 0.556   | 0.333      | 0               |
| HVGEIPVAY                        | 0.111              | 0.111              | 0.111    | 0.667        | 0.667        | 0.111       | 0.111   | 0.111    | 0.556          | 0.222          | 0.222   | 0          | 0               |
| HVGEIPVAYR                       | 0.2                | 0.1                | 0.1      | 0.6          | 0.6          | 0.1         | 0.1     | 0.2      | 0.5            | 0.3            | 0.2     | 0          | 0               |
| RPDTRYVLM                        | 0.222              | 0.111              | 0.222    | 0.444        | 0.333        | 0.111       | 0.111   | 0.222    | 0.556          | 0.333          | 0.222   | 0.111      | 0.111           |
| VCVSTSGRW                        | 0.111              | 0                  | 0.444    | 0.444        | 0.333        | 0.111       | 0       | 0.111    | 0.556          | 0.111          | 0.444   | 0.333      | 0.111           |
| DTLSLTNMK                        | 0.1                | 0.1                | 0.4      | 0.3          | 0.2          | 0           | 0.1     | 0.1      | 0.6            | 0.2            | 0.5     | 0.4        | 0.1             |
| LSLTNTMCK                        | 0.222              | 0                  | 0.333    | 0.333        | 0.222        | 0           | 0       | 0.222    | 0.556          | 0.333          | 0.333   | 0.333      | 0.111           |
| VTHSKGLYR                        | 0.333              | 0                  | 0.333    | 0.333        | 0.333        | 0.111       | 0       | 0.333    | 0.333          | 0.333          | 0.333   | 0.222      | 0               |
| VTHSKGLYRK                       | 0.4                | 0                  | 0.3      | 0.3          | 0.3          | 0.1         | 0       | 0.4      | 0.3            | 0.4            | 0.3     | 0.2        | 0               |
| VYYPDKVFR                        | 0.222              | 0.111              | 0.222    | 0.444        | 0.333        | 0.333       | 0.111   | 0.222    | 0.444          | 0.333          | 0.111   | 0          | 0               |
| GVYYPDKVFR                       | 0.2                | 0.1                | 0.2      | 0.5          | 0.4          | 0.3         | 0.1     | 0.2      | 0.4            | 0.3            | 0.2     | 0          | 0               |
| LEQPTSEAV                        | 0                  | 0.222              | 0.333    | 0.444        | 0.444        | 0           | 0.222   | 0        | 0.556          | 0.111          | 0.556   | 0.222      | 0               |
| EVVLKTGDL                        | 0.111              | 0.222              | 0.111    | 0.556        | 0.556        | 0           | 0.222   | 0.111    | 0.556          | 0.111          | 0.444   | 0.111      | 0               |

Table S7: List of Physico-chemical properties of MHC-I restricted T-cell epitopes

| MHC-I restricted T-cell Epitopes | Positively charged | Negatively charged | Polarity | Non Polarity | Aliphaticity | Aromaticity | Acidity | Basicity | Hydrophobicity | Hydrophilicity | Neutral | Hydroxylic | Sulphur Content |
|----------------------------------|--------------------|--------------------|----------|--------------|--------------|-------------|---------|----------|----------------|----------------|---------|------------|-----------------|
| ITFLKKDAPYIVGDV                  | 0.133              | 0.133              | 0.133    | 0.6          | 0.533        | 0.133       | 0.133   | 0.133    | 0.6            | 0.2            | 0.267   | 0.067      | 0               |
| IDITFLKKDAPYIVG                  | 0.133              | 0.133              | 0.133    | 0.6          | 0.533        | 0.133       | 0.133   | 0.133    | 0.6            | 0.2            | 0.267   | 0.067      | 0               |
| CGSVGFNIDYDCVSF                  | 0                  | 0.133              | 0.333    | 0.467        | 0.333        | 0.2         | 0.133   | 0        | 0.467          | 0.067          | 0.4     | 0.133      | 0.133           |
| KGKYVQIPTTCANDP                  | 0.133              | 0.067              | 0.333    | 0.4          | 0.4          | 0.067       | 0.067   | 0.133    | 0.533          | 0.333          | 0.333   | 0.133      | 0.067           |
| DLKGKYVQIPTTCAN                  | 0.133              | 0.067              | 0.333    | 0.4          | 0.4          | 0.067       | 0.067   | 0.133    | 0.533          | 0.267          | 0.333   | 0.133      | 0.067           |
| QIELKFNPPALQDAY                  | 0.067              | 0.133              | 0.2      | 0.533        | 0.467        | 0.133       | 0.133   | 0.067    | 0.533          | 0.267          | 0.267   | 0          | 0               |
| IELKFNPPALQDAYY                  | 0.067              | 0.133              | 0.2      | 0.533        | 0.467        | 0.2         | 0.133   | 0.067    | 0.533          | 0.267          | 0.2     | 0          | 0               |
| GVYSVIYLYLTFYLT                  | 0                  | 0                  | 0.467    | 0.533        | 0.467        | 0.333       | 0       | 0        | 0.6            | 0              | 0.267   | 0.2        | 0               |
| PQVNGLSIKWADNN                   | 0.067              | 0.067              | 0.2      | 0.467        | 0.4          | 0.067       | 0.067   | 0.067    | 0.467          | 0.333          | 0.333   | 0.133      | 0               |
| KYPQVNGLSIKWAD                   | 0.133              | 0.067              | 0.267    | 0.467        | 0.4          | 0.133       | 0.067   | 0.133    | 0.467          | 0.267          | 0.333   | 0.133      | 0               |
| YQLKLLIHHRAQNMT                  | 0.267              | 0                  | 0.267    | 0.4          | 0.333        | 0.067       | 0       | 0.267    | 0.467          | 0.333          | 0.2     | 0.067      | 0.067           |
| DYQLKLLIHHRAQNM                  | 0.267              | 0.067              | 0.2      | 0.4          | 0.333        | 0.067       | 0.067   | 0.267    | 0.4            | 0.333          | 0.2     | 0          | 0.067           |
| DIPIGAGICASYQTQ                  | 0                  | 0.067              | 0.4      | 0.533        | 0.533        | 0.067       | 0.067   | 0        | 0.533          | 0.067          | 0.467   | 0.133      | 0.067           |
| KHFYWFSSNYLKRRV                  | 0.333              | 0                  | 0.2      | 0.4          | 0.133        | 0.4         | 0       | 0.333    | 0.4            | 0.4            | 0.067   | 0.067      | 0               |
| TKHFYWFSSNYLKRR                  | 0.333              | 0                  | 0.267    | 0.333        | 0.067        | 0.4         | 0       | 0.333    | 0.4            | 0.4            | 0.133   | 0.133      | 0               |
| ATKAYNVTQAFGRR                   | 0.214              | 0                  | 0.286    | 0.429        | 0.357        | 0.143       | 0       | 0.214    | 0.5            | 0.286          | 0.286   | 0.143      | 0               |
| KAYNVTQAFGRRGP                   | 0.214              | 0                  | 0.214    | 0.5          | 0.429        | 0.143       | 0       | 0.214    | 0.429          | 0.357          | 0.286   | 0.071      | 0               |
| VEGFNCYFPLQSYGF                  | 0                  | 0.067              | 0.333    | 0.533        | 0.333        | 0.333       | 0.067   | 0        | 0.467          | 0.133          | 0.333   | 0.067      | 0.067           |
| NGVEGFNCYFPLQSY                  | 0                  | 0.067              | 0.333    | 0.467        | 0.333        | 0.267       | 0.067   | 0        | 0.4            | 0.2            | 0.333   | 0.067      | 0.067           |
| PVPYCYDTNVLEGSV                  | 0                  | 0.133              | 0.333    | 0.467        | 0.467        | 0.133       | 0.133   | 0        | 0.533          | 0.2            | 0.333   | 0.133      | 0.067           |
| GKPVYCYDTNVLEG                   | 0.067              | 0.133              | 0.267    | 0.467        | 0.467        | 0.133       | 0.133   | 0.067    | 0.467          | 0.267          | 0.333   | 0.067      | 0.067           |
| VDHSYVVNAVTTMSY                  | 0.067              | 0.067              | 0.4      | 0.4          | 0.333        | 0.133       | 0.067   | 0.067    | 0.533          | 0.133          | 0.333   | 0.267      | 0.067           |
| CTNYMPYFFTLQL                    | 0                  | 0                  | 0.4      | 0.533        | 0.333        | 0.267       | 0       | 0        | 0.733          | 0.133          | 0.2     | 0.133      | 0.133           |
| LSFCAFAVDAAKAYK                  | 0.133              | 0.067              | 0.2      | 0.6          | 0.467        | 0.2         | 0.067   | 0.133    | 0.667          | 0.133          | 0.133   | 0.067      | 0.067           |
| TTTLNGLWDDVVYC                   | 0                  | 0.133              | 0.333    | 0.467        | 0.4          | 0.133       | 0.133   | 0        | 0.667          | 0.067          | 0.4     | 0.2        | 0.067           |
| TLNGLWDDVVYCPR                   | 0.067              | 0.133              | 0.2      | 0.533        | 0.467        | 0.133       | 0.133   | 0.067    | 0.6            | 0.2            | 0.267   | 0.067      | 0.067           |
| VAYRKVLLRKNGNKG                  | 0.333              | 0                  | 0.067    | 0.467        | 0.467        | 0.067       | 0       | 0.333    | 0.333          | 0.467          | 0.133   | 0          | 0               |
| IPVAYRKVLLRKNGN                  | 0.267              | 0                  | 0.067    | 0.533        | 0.533        | 0.067       | 0       | 0.267    | 0.467          | 0.467          | 0.067   | 0          | 0               |
| LMDGSIIQFPNTYLE                  | 0                  | 0.133              | 0.267    | 0.533        | 0.4          | 0.133       | 0.133   | 0        | 0.533          | 0.133          | 0.4     | 0.133      | 0.067           |
| TSGRWVLNNDYYRSL                  | 0.133              | 0.067              | 0.333    | 0.333        | 0.267        | 0.2         | 0.067   | 0.133    | 0.333          | 0.267          | 0.333   | 0.2        | 0               |
| STSGRWVLNNDYYRS                  | 0.133              | 0.067              | 0.4      | 0.267        | 0.2          | 0.2         | 0.067   | 0.133    | 0.267          | 0.267          | 0.4     | 0.267      | 0               |
| TTNMKKQFHIYLRIV                  | 0.2                | 0                  | 0.267    | 0.467        | 0.333        | 0.133       | 0       | 0.2      | 0.6            | 0.267          | 0.2     | 0.133      | 0.067           |
| ETFVTHSKGLYRKCV                  | 0.267              | 0.067              | 0.333    | 0.333        | 0.267        | 0.133       | 0.067   | 0.267    | 0.467          | 0.267          | 0.333   | 0.2        | 0.067           |
| LGETFVTHSKGLYRK                  | 0.267              | 0.067              | 0.267    | 0.4          | 0.333        | 0.133       | 0.067   | 0.267    | 0.4            | 0.267          | 0.4     | 0.2        | 0               |
| TRGVYYPDKVFRSSV                  | 0.2                | 0.067              | 0.333    | 0.4          | 0.333        | 0.2         | 0.067   | 0.2      | 0.4            | 0.267          | 0.333   | 0.2        | 0               |
| GDLQPLEQPTSEAVE                  | 0                  | 0.267              | 0.267    | 0.467        | 0.467        | 0           | 0.267   | 0        | 0.467          | 0.133          | 0.6     | 0.133      | 0               |
| EVVLKTGDLQPLEQP                  | 0.067              | 0.2                | 0.2      | 0.533        | 0.533        | 0           | 0.2     | 0.067    | 0.533          | 0.2            | 0.467   | 0.067      | 0               |

Table S8: List of Physico-chemical properties of MHC-II restricted T-cell epitopes



| B-cell<br>T-cell Epitopes | Positively<br>charged | Negatively<br>charged | Polarity | Non<br>Polarity | Aliphaticity | Aromaticity | Acidity | Basicity | Hydrophobicity | Hydrophilicity | Neutral | Hydroxylic | Sulphur<br>Content |
|---------------------------|-----------------------|-----------------------|----------|-----------------|--------------|-------------|---------|----------|----------------|----------------|---------|------------|--------------------|
| TLVSDIDITFLKKDAP          | 0.125                 | 0.188                 | 0.188    | 0.5             | 0.438        | 0.062       | 0.188   | 0.125    | 0.625          | 0.188          | 0.375   | 0.188      | 0                  |
| LHPDSATLVSDIDITF          | 0.062                 | 0.188                 | 0.25     | 0.5             | 0.438        | 0.062       | 0.188   | 0.062    | 0.625          | 0.125          | 0.438   | 0.25       | 0                  |
| CGSVGFNIDYDCVSFC          | 0                     | 0.125                 | 0.375    | 0.438           | 0.312        | 0.188       | 0.125   | 0        | 0.5            | 0.062          | 0.375   | 0.125      | 0.188              |
| TTCANDPVGFTLKNTV          | 0.062                 | 0.062                 | 0.312    | 0.438           | 0.375        | 0.062       | 0.062   | 0.062    | 0.688          | 0.25           | 0.375   | 0.25       | 0.062              |
| LQQIELKFNPPALQDA          | 0.062                 | 0.125                 | 0.188    | 0.562           | 0.5          | 0.062       | 0.125   | 0.062    | 0.562          | 0.25           | 0.312   | 0          | 0                  |
| YSVIYLYLTFYLTNDV          | 0                     | 0.062                 | 0.438    | 0.438           | 0.375        | 0.312       | 0.062   | 0        | 0.562          | 0.062          | 0.25    | 0.188      | 0                  |
| KYPQVNGLTSLKWADN          | 0.125                 | 0.062                 | 0.25     | 0.438           | 0.375        | 0.125       | 0.062   | 0.125    | 0.438          | 0.312          | 0.312   | 0.125      | 0                  |
| FWDYQLKLLIHHRAQN          | 0.25                  | 0.062                 | 0.188    | 0.438           | 0.312        | 0.188       | 0.062   | 0.25     | 0.438          | 0.312          | 0.188   | 0          | 0                  |
| IHHRAQNMTMSYSLKP          | 0.25                  | 0                     | 0.312    | 0.375           | 0.25         | 0.062       | 0       | 0.25     | 0.438          | 0.375          | 0.25    | 0.188      | 0.125              |
| GCLIGAEHVNNSYECD          | 0.062                 | 0.188                 | 0.25     | 0.375           | 0.375        | 0.062       | 0.188   | 0.062    | 0.375          | 0.188          | 0.375   | 0.062      | 0.125              |
| ISTKHFYWFSSNYLKR          | 0.25                  | 0                     | 0.312    | 0.375           | 0.125        | 0.375       | 0       | 0.25     | 0.438          | 0.312          | 0.188   | 0.188      | 0                  |
| KSAAEASKKPRQKRTA          | 0.375                 | 0.062                 | 0.25     | 0.312           | 0.312        | 0           | 0.062   | 0.375    | 0.375          | 0.438          | 0.312   | 0.188      | 0                  |
| GRRGPEQTQGNFGDQE          | 0.125                 | 0.188                 | 0.25     | 0.375           | 0.312        | 0.062       | 0.188   | 0.125    | 0.188          | 0.25           | 0.688   | 0.062      | 0                  |
| GSTPCNGVEGFNCYFP          | 0                     | 0.062                 | 0.312    | 0.5             | 0.375        | 0.188       | 0.062   | 0        | 0.5            | 0.25           | 0.375   | 0.125      | 0.125              |
| EGFNCYFPLQSYGFQP          | 0                     | 0.062                 | 0.375    | 0.5             | 0.312        | 0.312       | 0.062   | 0        | 0.438          | 0.188          | 0.375   | 0.062      | 0.062              |
| SGKPVYCYDTNVLEG           | 0.062                 | 0.125                 | 0.312    | 0.438           | 0.438        | 0.125       | 0.125   | 0.062    | 0.438          | 0.25           | 0.375   | 0.125      | 0.062              |
| LAYVDHSYVVNAVTTM          | 0.062                 | 0.062                 | 0.312    | 0.5             | 0.438        | 0.125       | 0.062   | 0.062    | 0.625          | 0.125          | 0.25    | 0.188      | 0.062              |
| VCTNYMPYFFTLQL            | 0                     | 0                     | 0.375    | 0.562           | 0.375        | 0.25        | 0       | 0        | 0.75           | 0.125          | 0.188   | 0.125      | 0.125              |
| GTGQAITVPEANMDQ           | 0                     | 0.125                 | 0.312    | 0.5             | 0.438        | 0           | 0.125   | 0        | 0.562          | 0.125          | 0.562   | 0.188      | 0.062              |
| KMLCTHTGTGQAITVT          | 0.125                 | 0                     | 0.438    | 0.438           | 0.375        | 0           | 0       | 0.125    | 0.688          | 0.125          | 0.5     | 0.312      | 0.125              |
| QVTCGTTLNLWLDD            | 0                     | 0.125                 | 0.375    | 0.438           | 0.375        | 0.062       | 0.125   | 0        | 0.625          | 0.062          | 0.562   | 0.25       | 0.062              |
| PHVGEIPVAYRKVLLR          | 0.25                  | 0.062                 | 0.062    | 0.625           | 0.625        | 0.062       | 0.062   | 0.25     | 0.562          | 0.375          | 0.125   | 0          | 0                  |
| GSIIQFPNTYLEGSVR          | 0.062                 | 0.062                 | 0.312    | 0.5             | 0.438        | 0.125       | 0.062   | 0.062    | 0.438          | 0.188          | 0.438   | 0.188      | 0                  |
| LRPDRYVLMDSIIQ            | 0.125                 | 0.125                 | 0.25     | 0.5             | 0.438        | 0.062       | 0.125   | 0.125    | 0.5            | 0.188          | 0.375   | 0.125      | 0.062              |
| YCRHGTCERSEAGVCV          | 0.188                 | 0.125                 | 0.375    | 0.312           | 0.312        | 0.062       | 0.125   | 0.188    | 0.438          | 0.188          | 0.375   | 0.125      | 0.188              |
| LRDTLSLTTNMKKQFI          | 0.188                 | 0.062                 | 0.312    | 0.375           | 0.25         | 0.062       | 0.062   | 0.188    | 0.562          | 0.25           | 0.375   | 0.25       | 0.062              |
| LNLGETFVTHSKGLYR          | 0.188                 | 0.062                 | 0.25     | 0.438           | 0.375        | 0.125       | 0.062   | 0.188    | 0.438          | 0.25           | 0.375   | 0.188      | 0                  |
| RGVYYPDKVFRSSVLH          | 0.25                  | 0.062                 | 0.25     | 0.438           | 0.375        | 0.188       | 0.062   | 0.25     | 0.375          | 0.312          | 0.25    | 0.125      | 0                  |
| TGDLQPLEQPTSEAVE          | 0                     | 0.25                  | 0.312    | 0.438           | 0.438        | 0           | 0.25    | 0        | 0.5            | 0.125          | 0.625   | 0.188      | 0                  |

Table S9: List of Physico-chemical properties of B-cell epitopes

| MHC-I restricted<br>T-cell epitopes | Score from<br>Autodock Vina | Z Score       | MHC-II restricted<br>T-cell epitopes | Score from<br>Autodock Vina | Z Score       |
|-------------------------------------|-----------------------------|---------------|--------------------------------------|-----------------------------|---------------|
| FLKKDAPYI                           | -8.2                        | -9.81         | ITFLKKDAPYIVGDV                      | -9                          | -5.2          |
| TAVVIPTKK                           | -8.1                        | -5.9          | IDITFLKKDAPYIVG                      | -8.8                        | -5.59         |
| FLNGSCGSV                           | Not Generated               | Not Generated | CGSVGFNIDYDCVSF                      | Not Generated               | Not Generated |
| GSGVGFNIDY                          | -7.1                        | -5.4          |                                      |                             |               |
| DLKGKYVQI                           | -8.1                        | -8.81         | KGKYVQIPTTCANDP                      | Not Generated               | Not Generated |
|                                     |                             |               | DLKGKYVQIPTTCAN                      | Not Generated               | Not Generated |
| NPPALQDAY                           | Not Generated               | Not Generated | QIELKFNPPALQDAY                      | Not Generated               | Not Generated |
| IELKFNPPAL                          | Not Generated               | Not Generated | IELKFNPPALQDAY                       | Not Generated               | Not Generated |
| VSFLAHIQW                           | -8.8                        | -9.26         | GVYSVIYLYLTFYLT                      | -8                          | -5.02         |
| QVNGLTSLKW                          | Not Generated               | Not Generated | PQVNGLTSLKWADNN                      | -8.3                        | -4.01         |
|                                     |                             |               | KYPQVNGLTSLKWAD                      | Not Generated               | Not Generated |
| RAQNMTMSY                           | Not Generated               | Not Generated | YQLKLLIHHRAQNMT                      | Not Generated               | Not Generated |
|                                     |                             |               | DYQLKLLIHHRAQNM                      | Not Generated               | Not Generated |

| MHC-I restricted<br>T-cell epitopes | Score from<br>Autodock Vina | Z Score       | MHC-II restricted<br>T-cell epitopes | Score from<br>Autodock Vina | Z Score       |
|-------------------------------------|-----------------------------|---------------|--------------------------------------|-----------------------------|---------------|
| HADQLTPTW                           | -8.2                        | -0.6          | DIPIGAGICASYQTQ                      | Not Generated               | Not Generated |
| ICISTKHFYW                          | Not Generated               | Not Generated | KHFYWFFSNYLKRRV                      | Not Generated               | Not Generated |
|                                     |                             |               | TKHFYWFFSNYLKRR                      | Not Generated               | Not Generated |
| AQFAPSASAF                          | Not Generated               | Not Generated | ATKAYNVTQAFGRR                       | -8.1                        | 0.64          |
|                                     |                             |               | KAYNVTQAFGRRG                        | -8.8                        | -5.05         |
| FERDISTEI                           | Not Generated               | Not Generated | VEGFNCYFPLQSYGF                      | Not Generated               | Not Generated |
| YFPLQSYGF                           | Not Generated               | Not Generated | NGVEGFNCYFPLQSY                      | Not Generated               | Not Generated |
| NVLEGSVAY                           | -8                          | -5.49         | PVPYCYDTNVLEGSV                      | -8.6                        | -5.4          |
| SGKPVYCY                            | -6.9                        | -5.49         | GKPVYCYDTNVLEG                       | -9.6                        | -5.31         |
| VLAYVDHSY                           | Not Generated               | Not Generated | VDHSYVNAVTMSY                        | Not Generated               | Not Generated |
| NYMPYFFTL                           | -8.3                        | -0.03         | CTNYMPYFFTLQL                        | -8.2                        | -5.63         |
| FAVDAAKAY                           | Not Generated               | Not Generated | LSFCAFAVDAAKAYK                      | Not Generated               | Not Generated |
| VPANSTVLSF                          | Not Generated               | Not Generated |                                      |                             |               |
| GTTTLNGLW                           | -8.8                        | -0.66         | TTTLNGLWDDVVYC                       | Not Generated               | Not Generated |
|                                     |                             |               | TLNGLWDDVVYCP                        | Not Generated               | Not Generated |
| HVGEIPVAY                           | Not Generated               | Not Generated | VAYRKVLLRKNGK                        | Not Generated               | Not Generated |
| HVGEIPVAYR                          | Not Generated               | Not Generated | IPVAYRKVLLRKNGN                      | Not Generated               | Not Generated |
| RPDTRYVLM                           | -8.1                        | -5.61         | LMDGSIQFPNTYLE                       | Not Generated               | Not Generated |
| VCVSTGRW                            | Not Generated               | Not Generated | TSGRWVNLNDYYRSL                      | Not Generated               | Not Generated |
|                                     | Not Generated               | Not Generated | STSGRWVNLNDYYRS                      | Not Generated               | Not Generated |
| DTLSLTTNMK                          | Not Generated               | Not Generated | TTNMKKQFIYLRIV                       | Not Generated               | Not Generated |
| LSLTTNMK                            | Not Generated               | Not Generated |                                      | Not Generated               | Not Generated |
| VTHSKGLYR                           | Not Generated               | Not Generated | ETFVTHSKGLYRKC                       | Not Generated               | Not Generated |
| VTHSKGLYRK                          | -8.4                        | -8.84         | LGETFVTHSKGLYRK                      | Not Generated               | Not Generated |
| VYYPDKVFR                           | Not Generated               | Not Generated | TRGVYYPDKVFRSSV                      | Not Generated               | Not Generated |
| GVYYPDKVFR                          | Not Generated               | Not Generated |                                      | Not Generated               | Not Generated |
| LEQPTSEAV                           | Not Generated               | Not Generated | GDLQPLEQPTSEAVE                      | Not Generated               | Not Generated |
| EVVLKTGDL                           | Not Generated               | Not Generated | EVVLKTGDLQPLEQP                      | Not Generated               | Not Generated |

Table S10: Docking and Z-scores of MHC-I and MHC-II restricted T-cell epitopes for 23 CCnRs

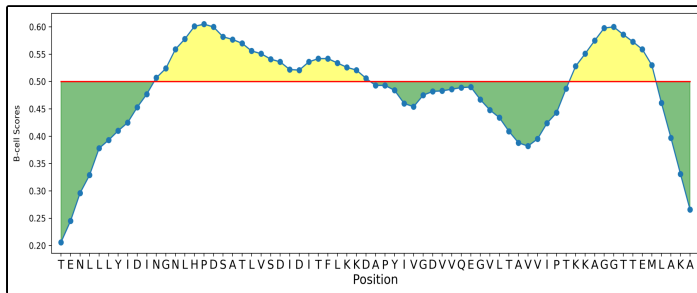

a

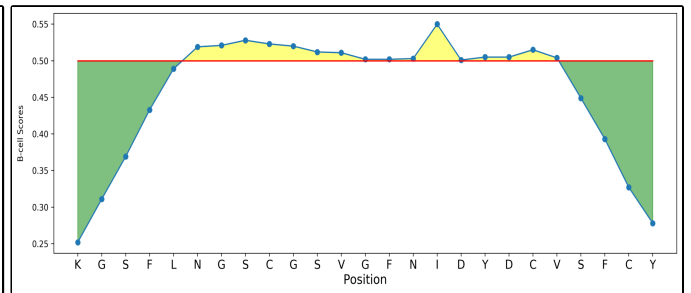

b

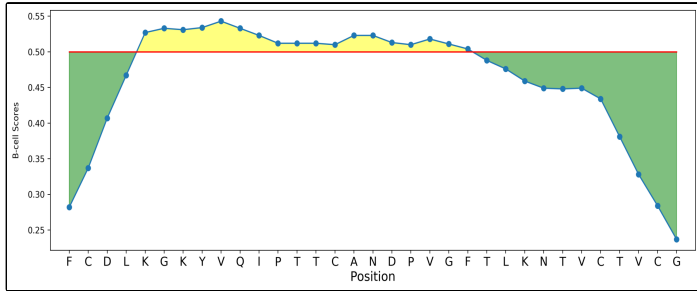

c

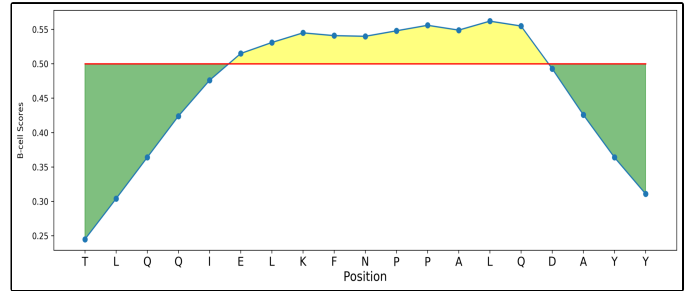

d

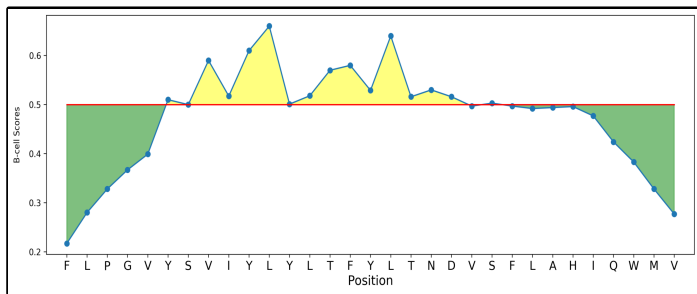

e

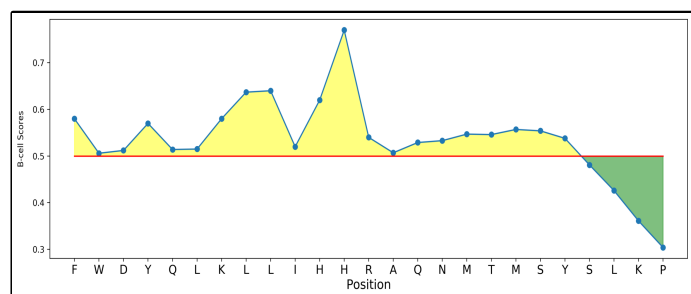

f

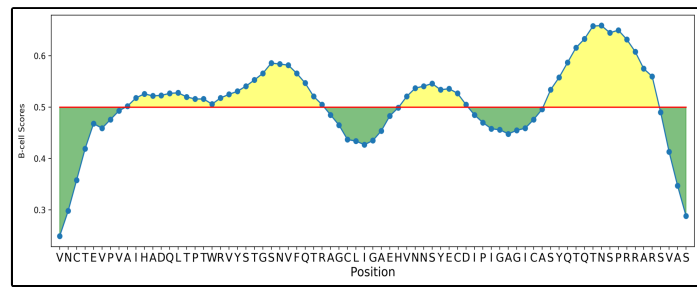

g

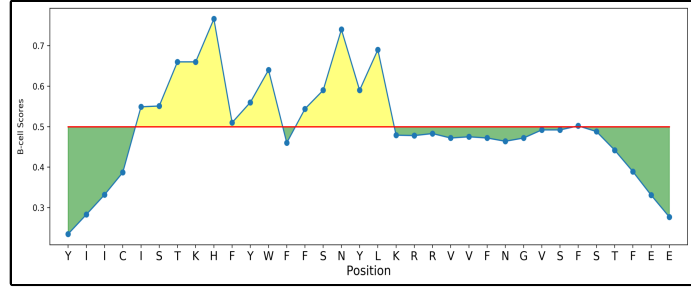

h

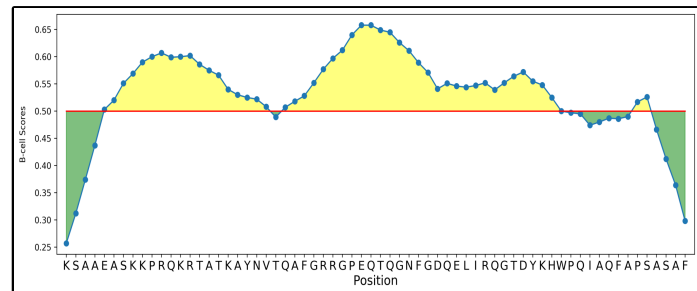

i

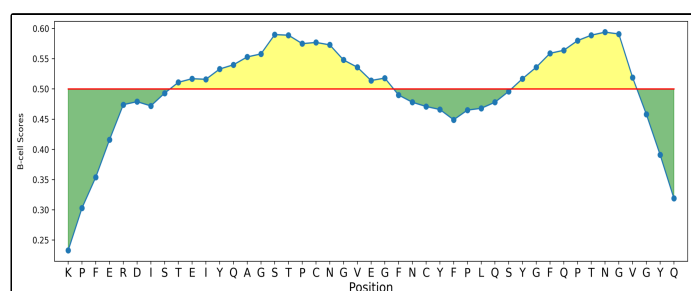

j

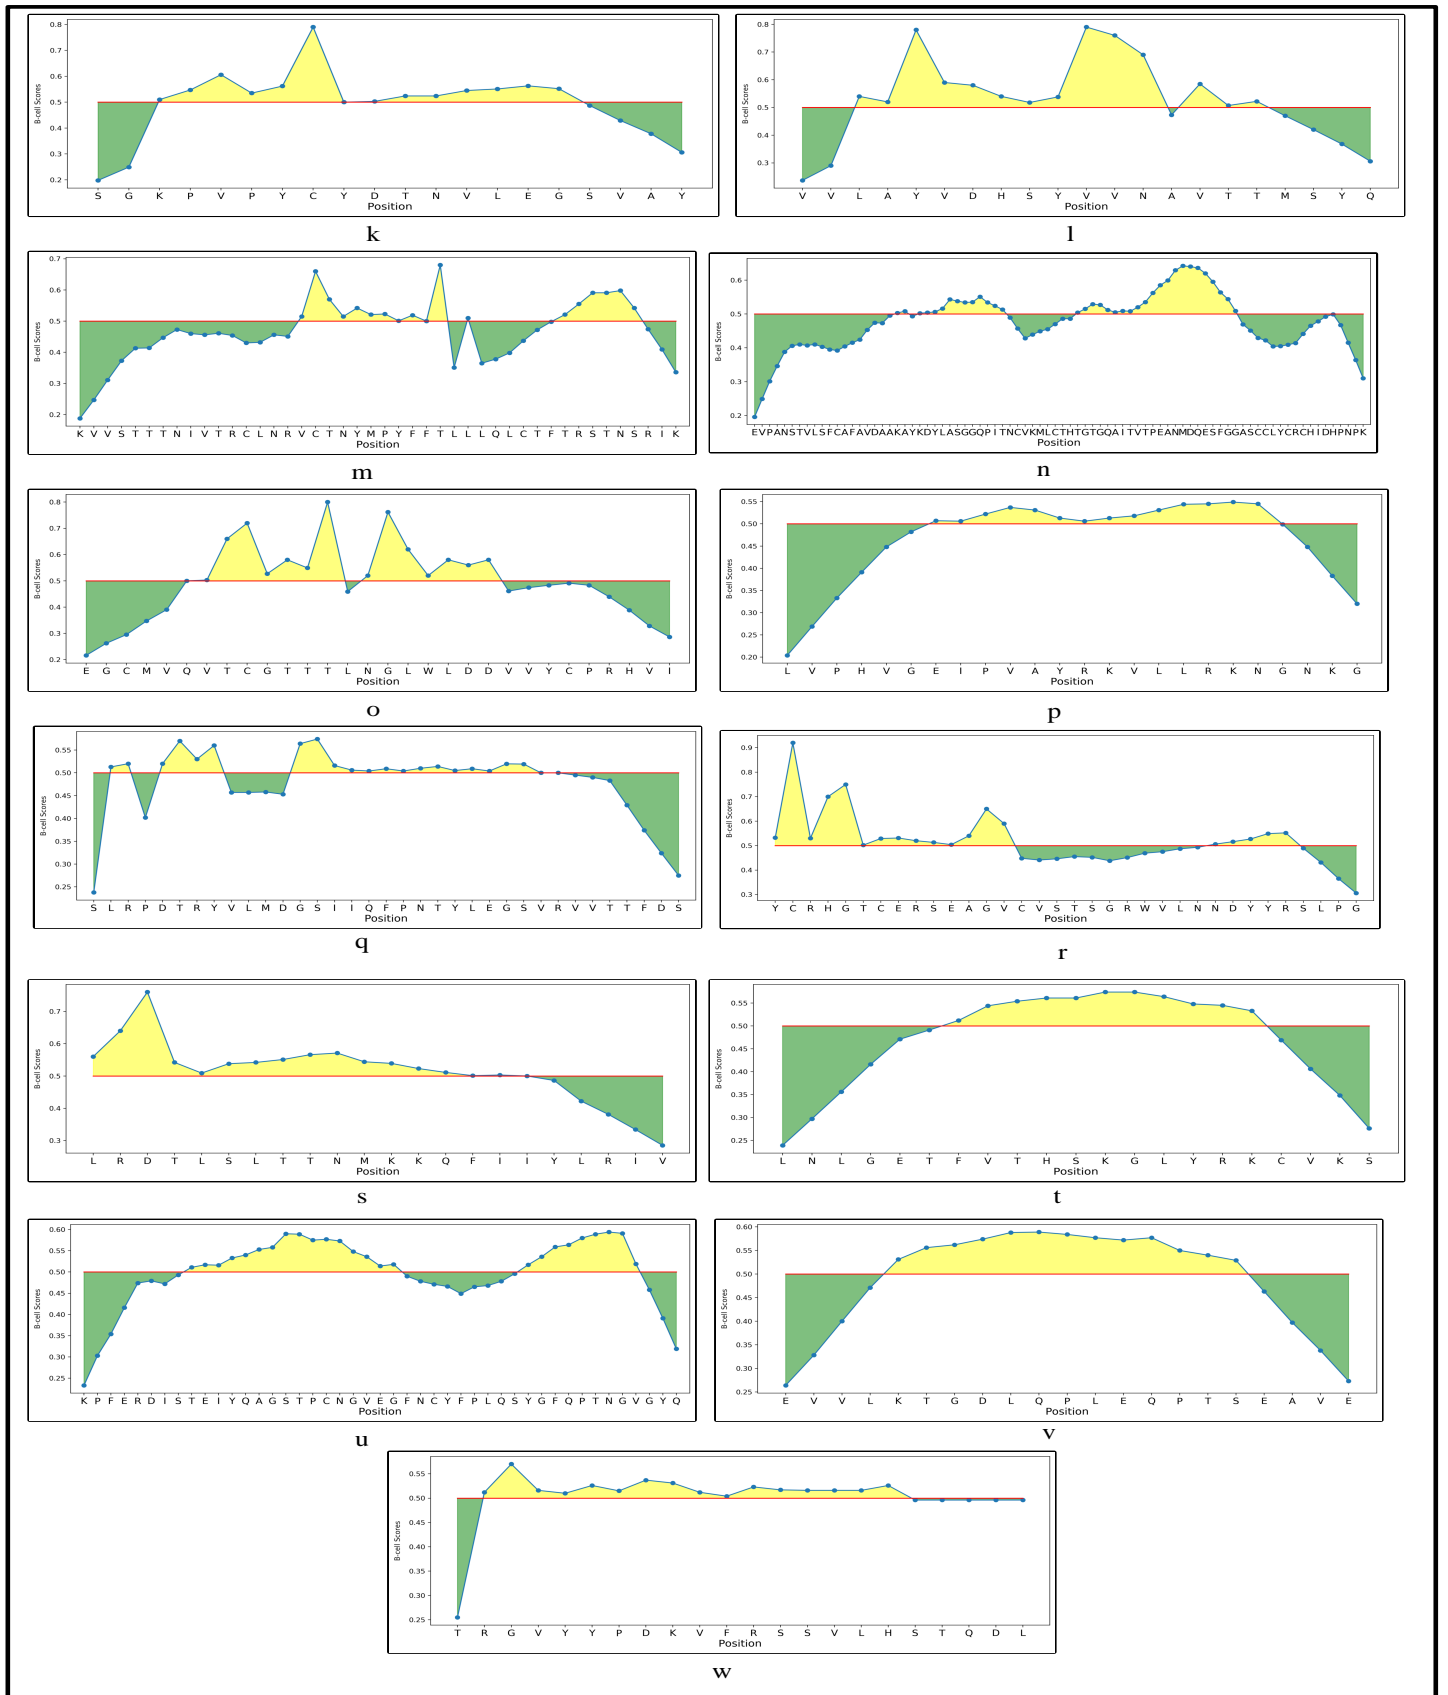

Figure S1: Graphical representation of B-cell epitopes for 23 CCnRS

TENLLLYIDINGNLHPDSATLVSDIDITFLKKDAPYIVGDVVQEGVLTAVVIPTKKAGGTTEMLAKA

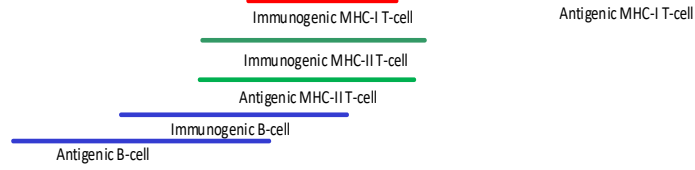

a

KGSFLNGSCGSGVGFNIDYDCVSFCY

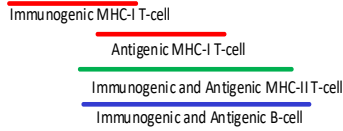

b

FCDLKGKYVQIPTTCANDPVGFTLKNVCTVCG

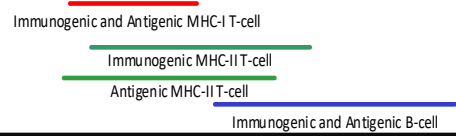

c

TLQQIELKFNPPALQDAYY

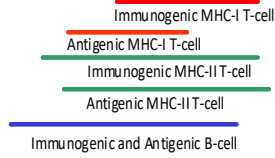

d

FLPGVYSVIYLYLTFYLTNDVSFLAHIQWMV

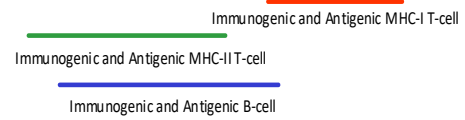

e

FLPGVYSVIYLYLTFYLTNDVSFLAHIQWMV

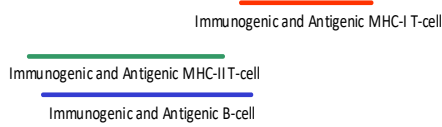

f

TKKWKYPQVNGLTSIKWADNNC

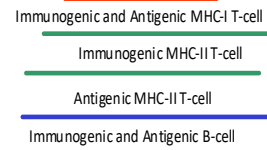

g

VNCTEVPVAIHADQLTPTWRVYSTGSNVFQTRAGCLIGAHEVNNSECDPIGAGICASYQTQTNSPRRARSVAS

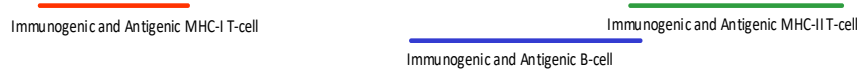

h

KSAEASKPRQKRTATKAYNVTQAFGRRGPEQTQGNFGDQELIRQGTDYKHWPKIAQFAPSASAF

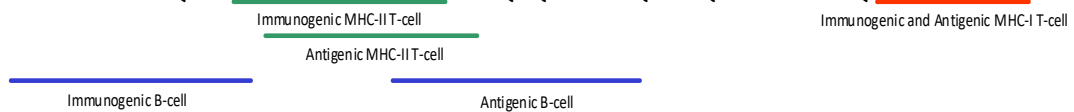

i

KPFERDISTEIQAGSTPCNGVEGFNCYFPLQSYGFQPTNGVGYQ

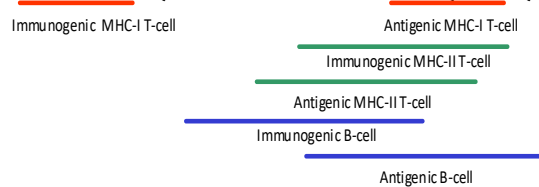

j

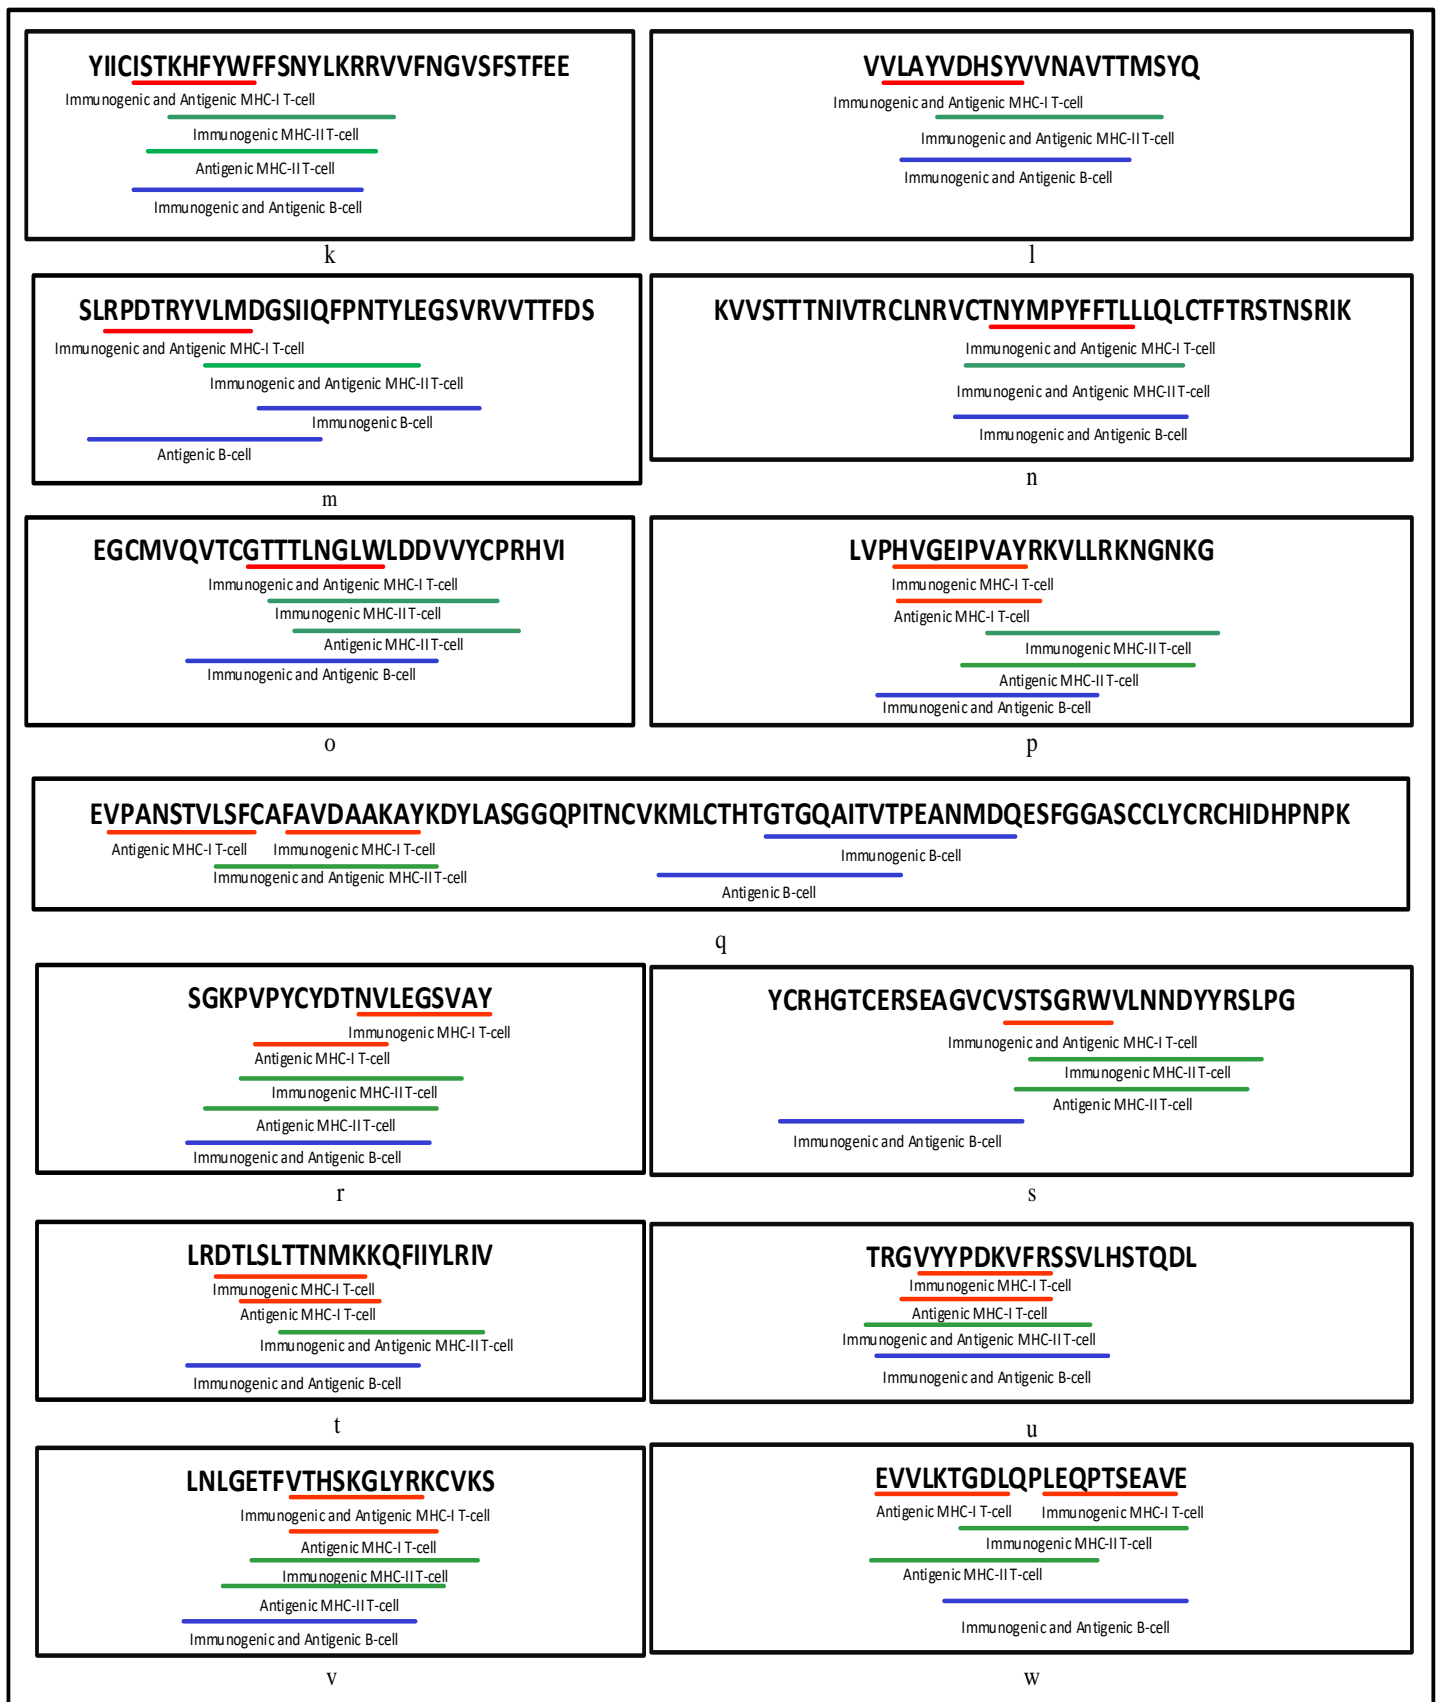

Figure S2: MHC-I, MHC-II restricted T-cell and B-cell epitopes underlined in the protein sequences of the 23 CCnRs

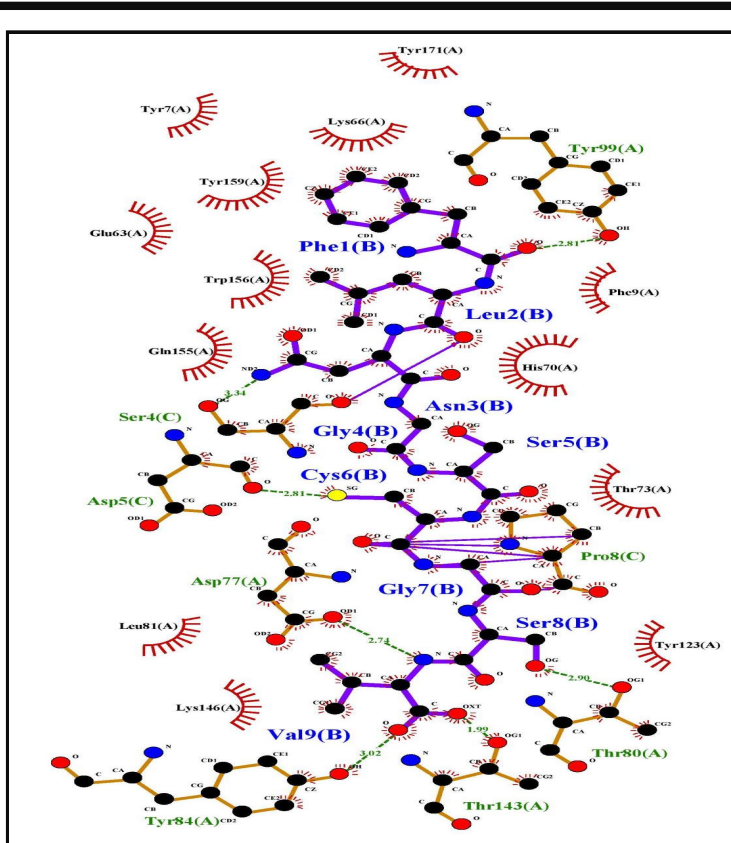

a

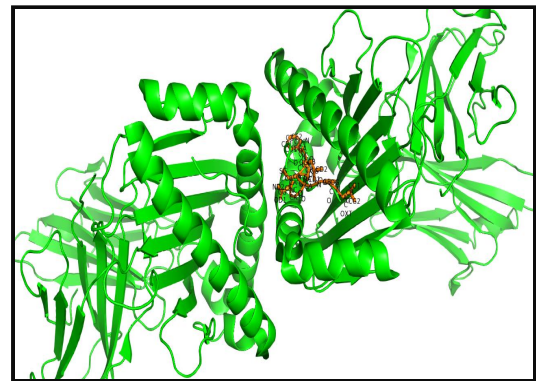

b

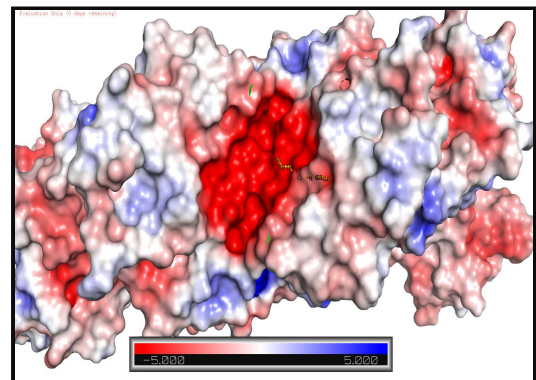

c

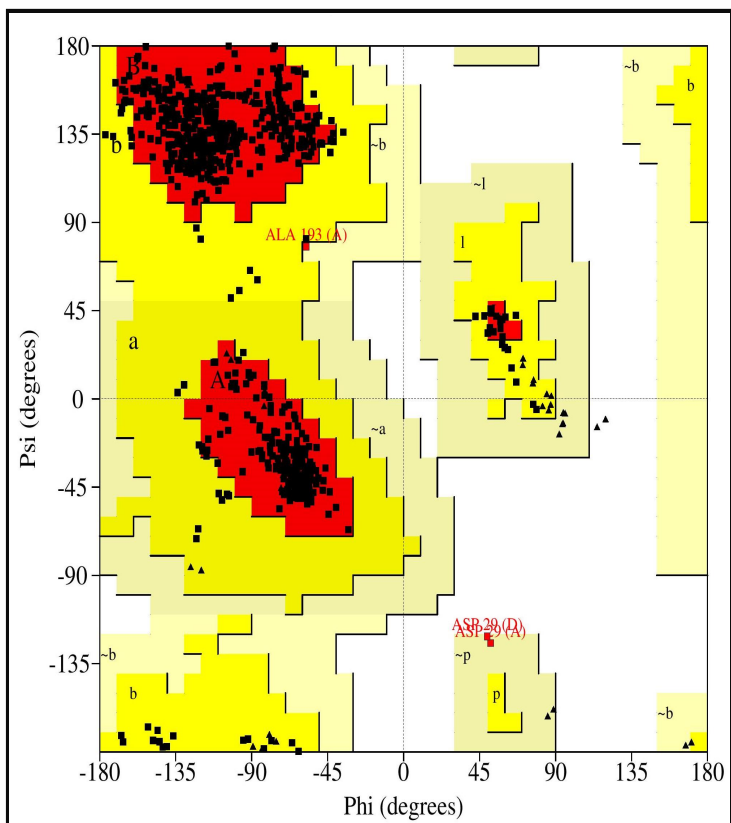

d

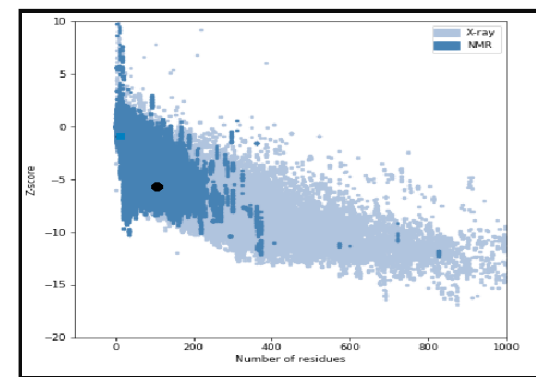

e

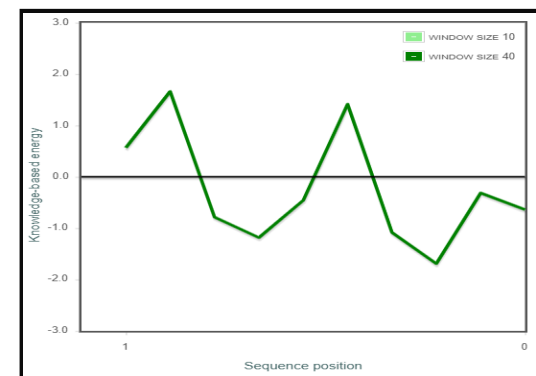

f

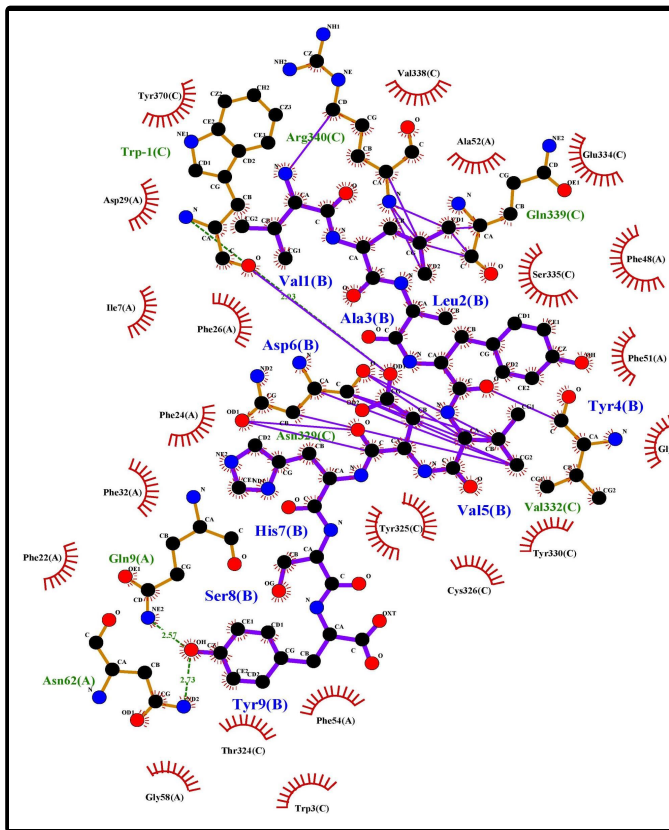

a

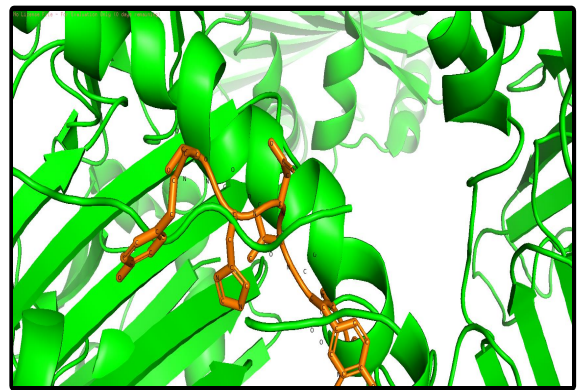

b

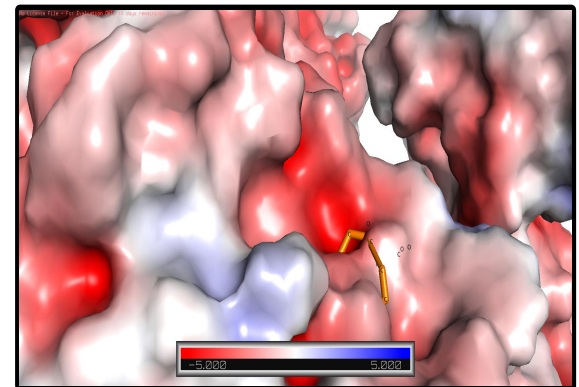

c

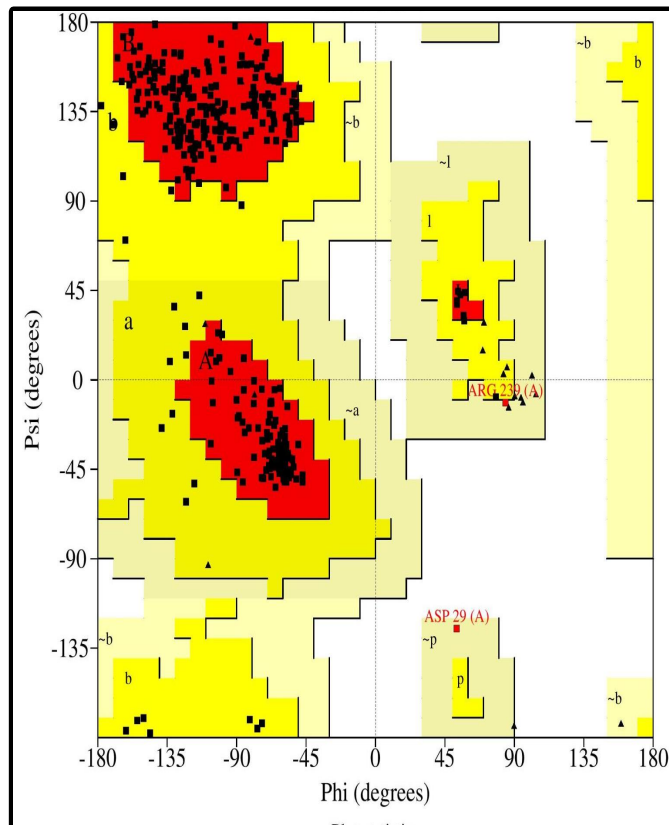

d

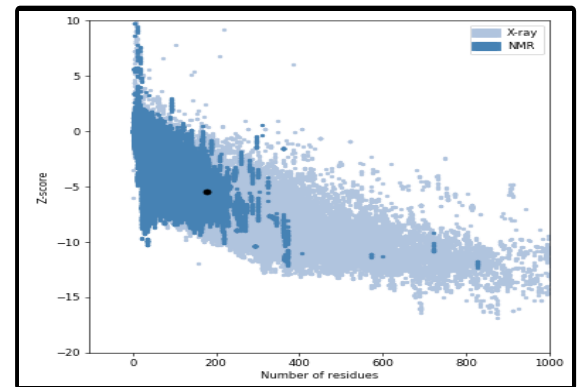

e

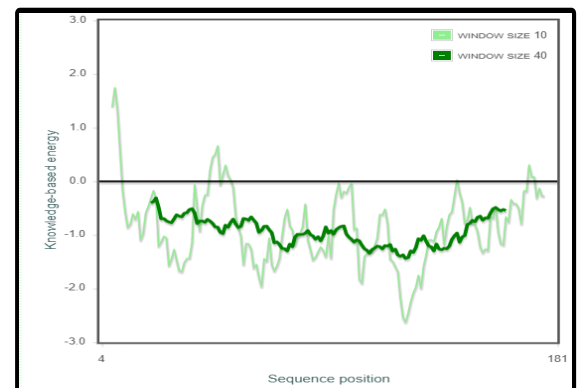

f



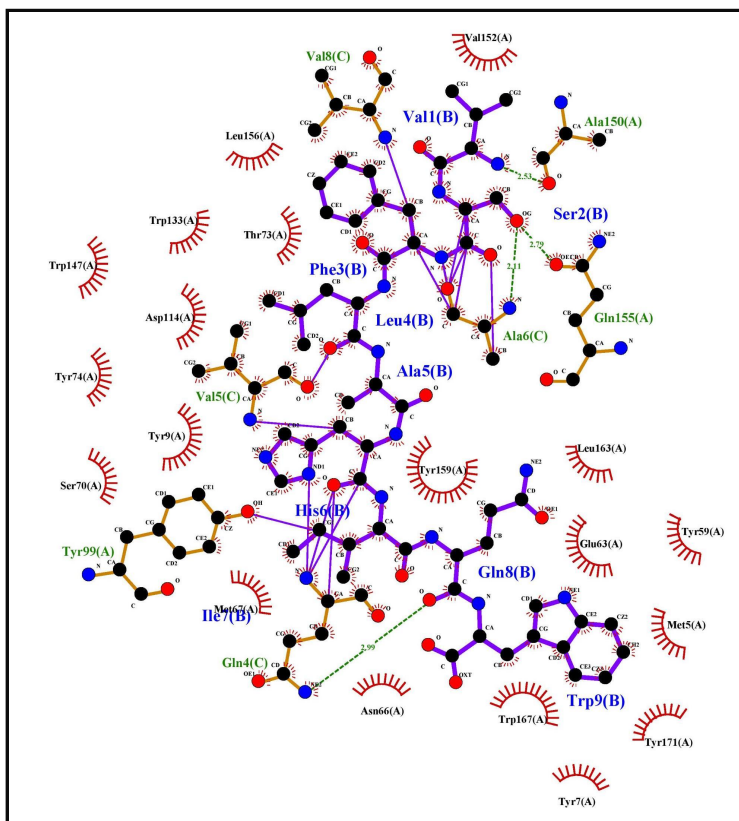

a

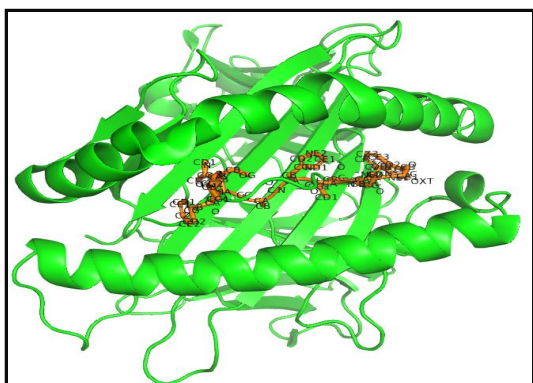

b

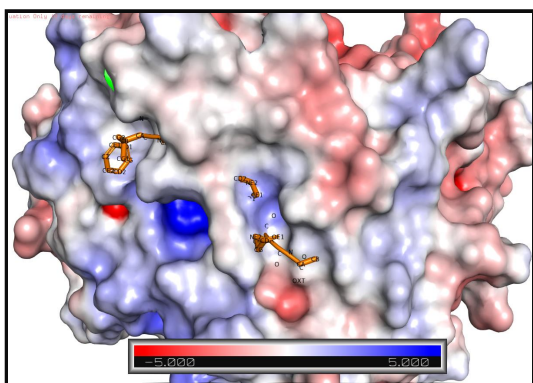

c

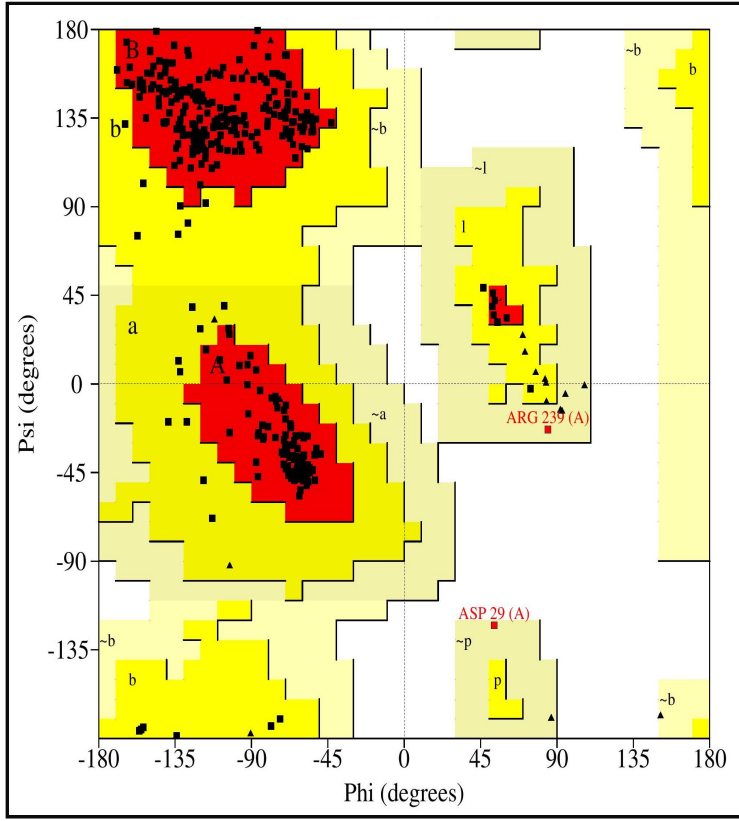

d

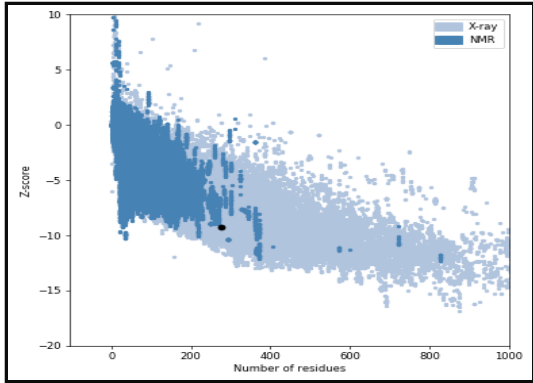

e

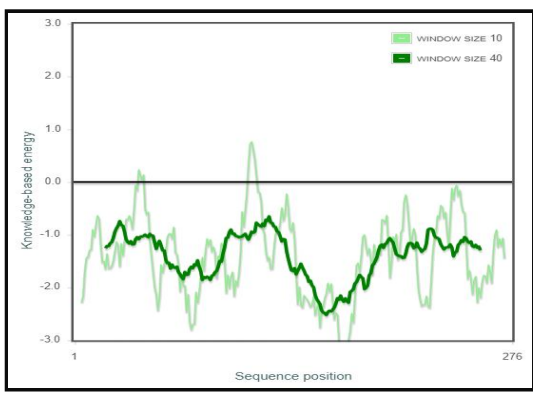

f

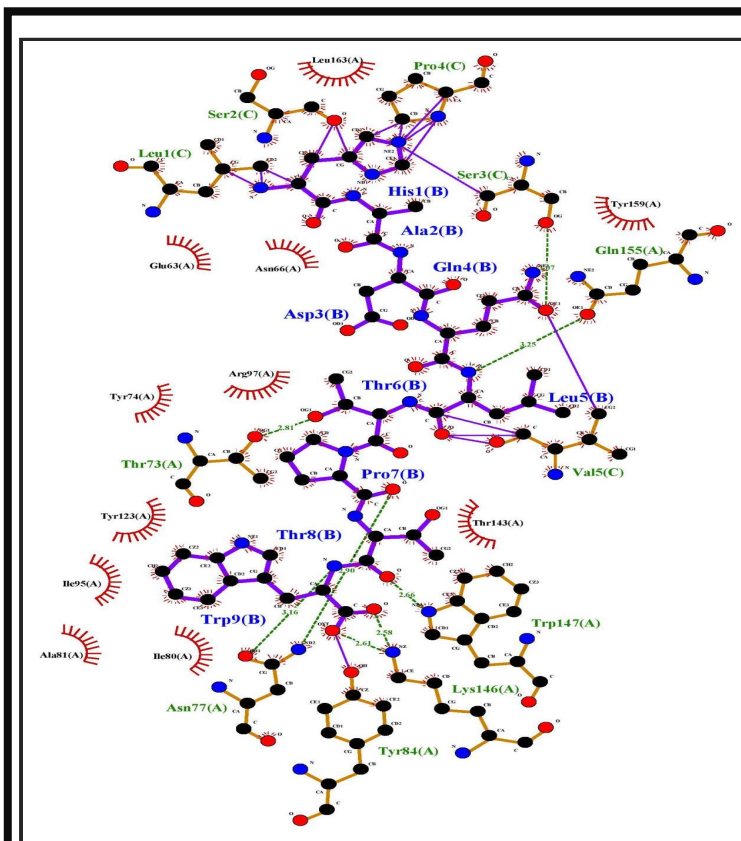

a

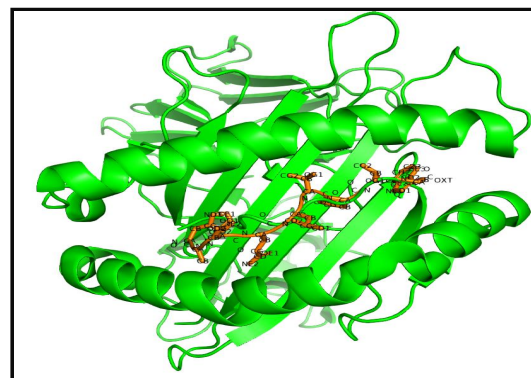

b

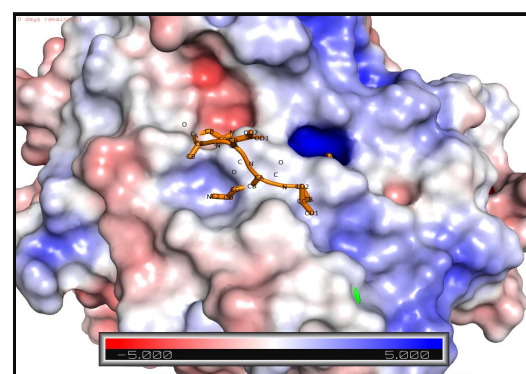

c

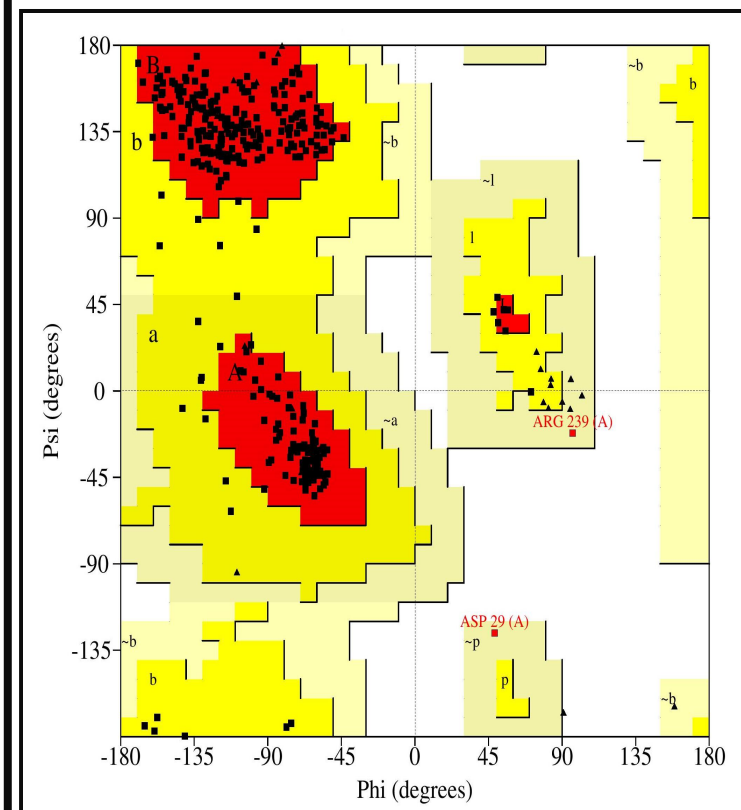

d

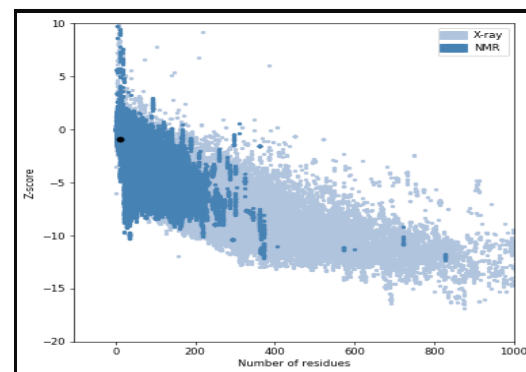

e

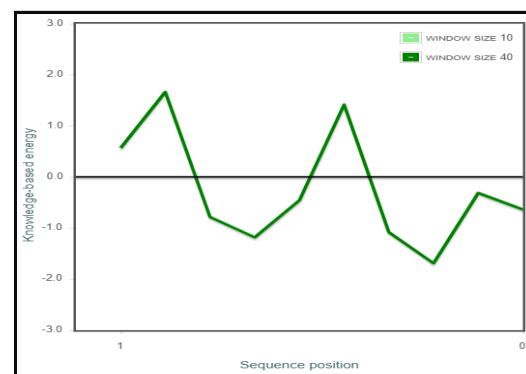

f

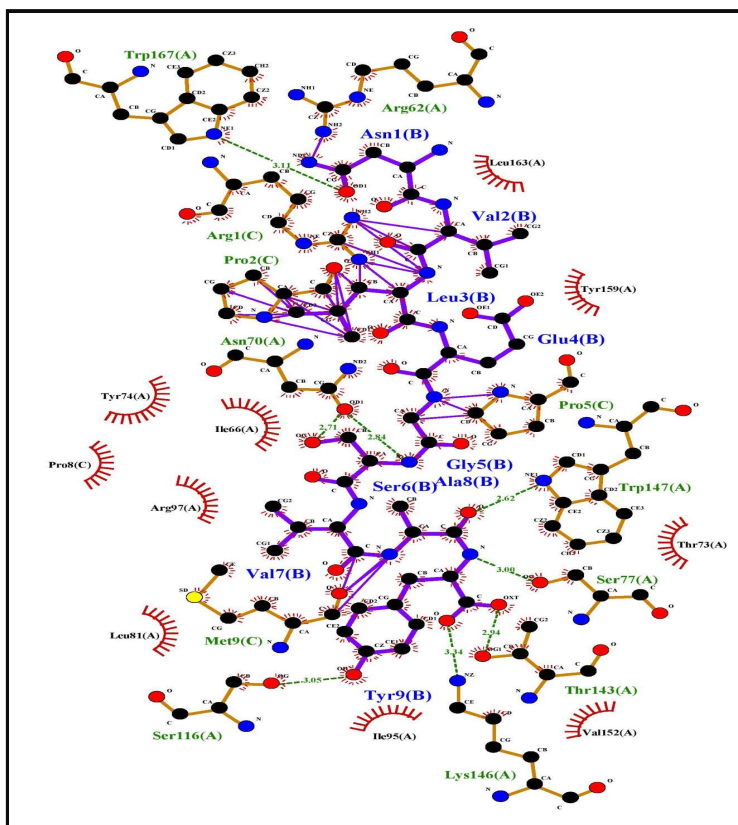

a

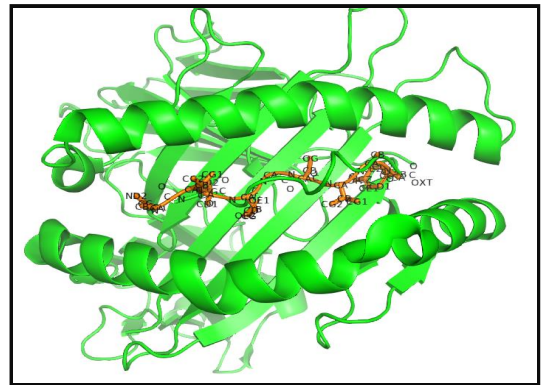

b

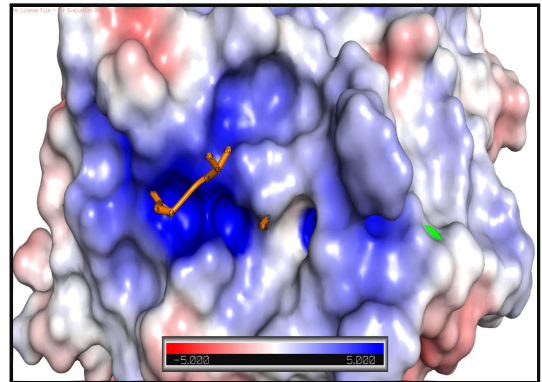

c

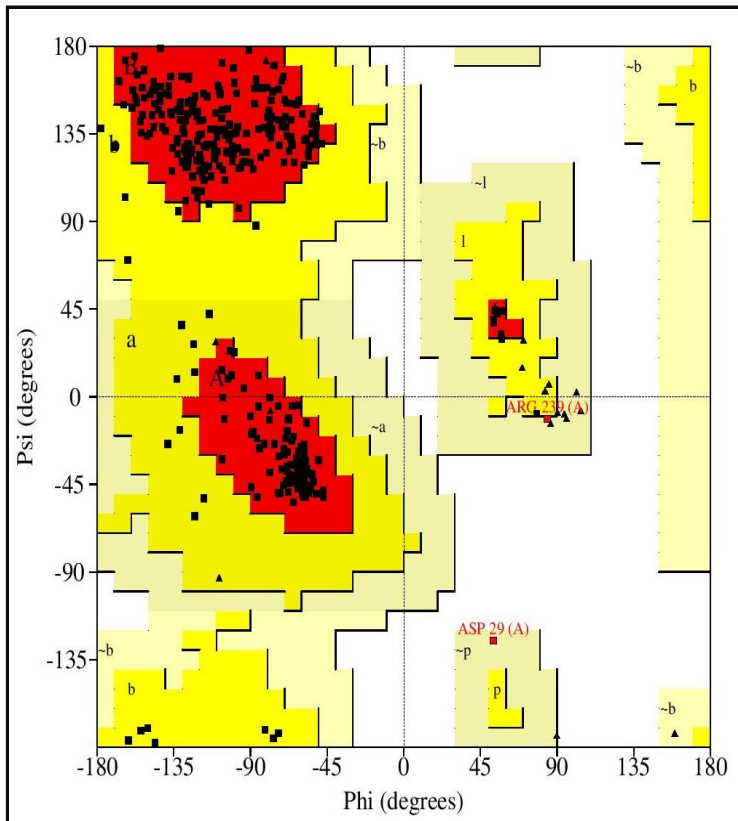

d

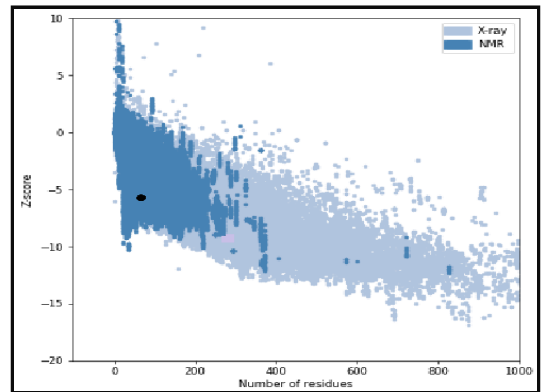

e

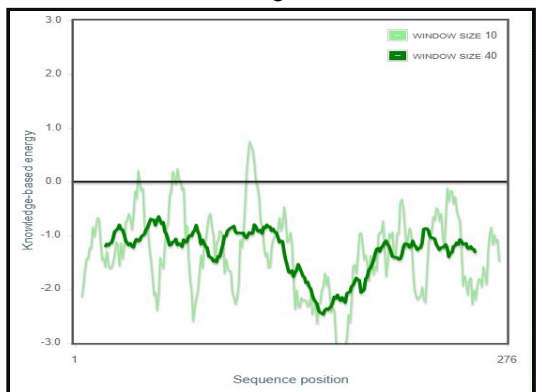

f



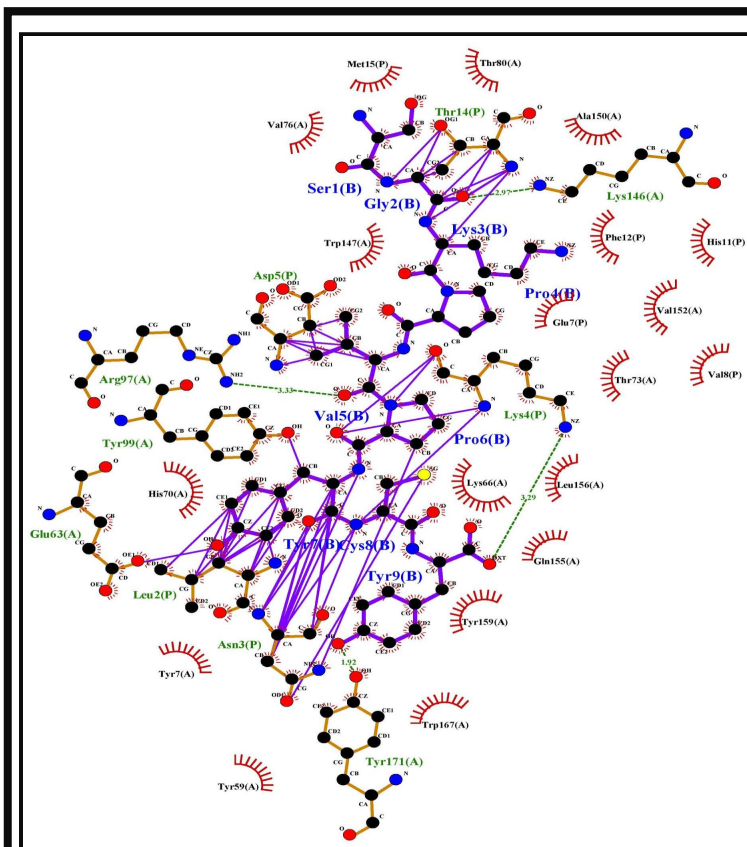

a

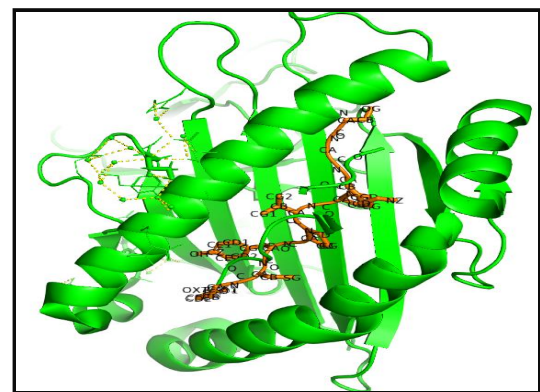

b

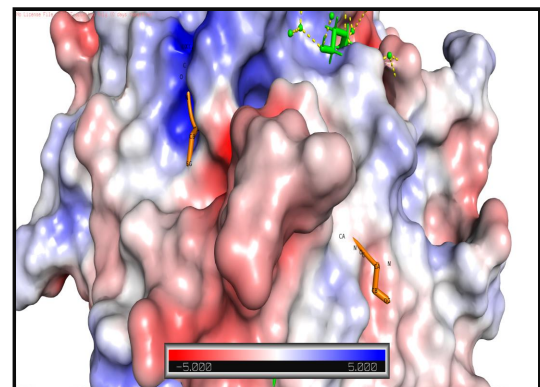

c

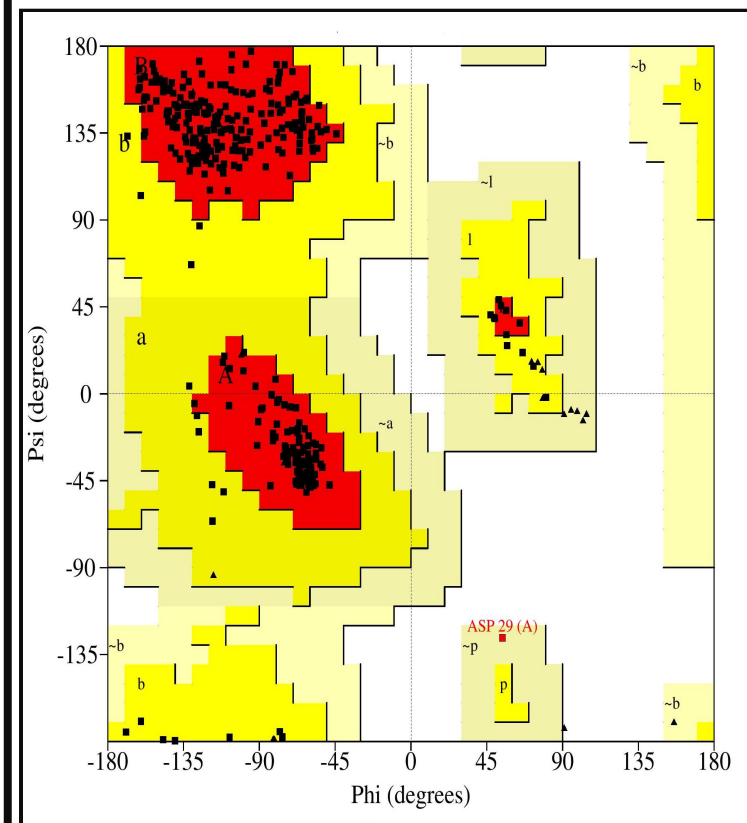

d

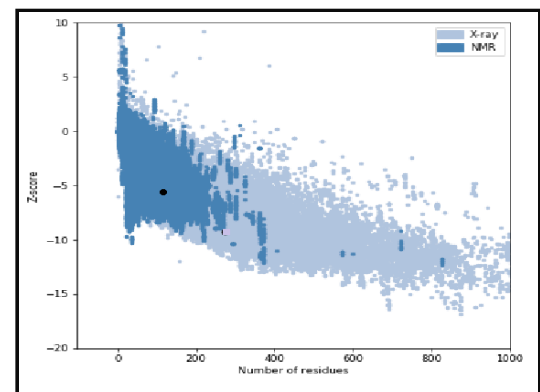

e

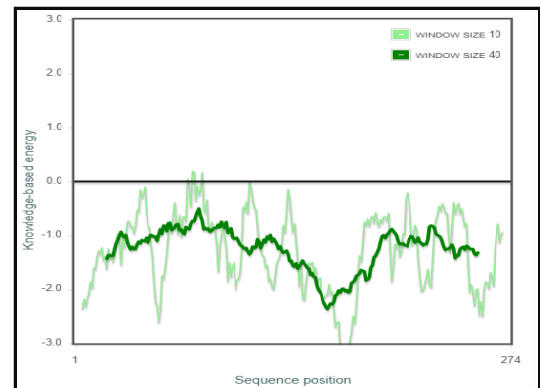

f

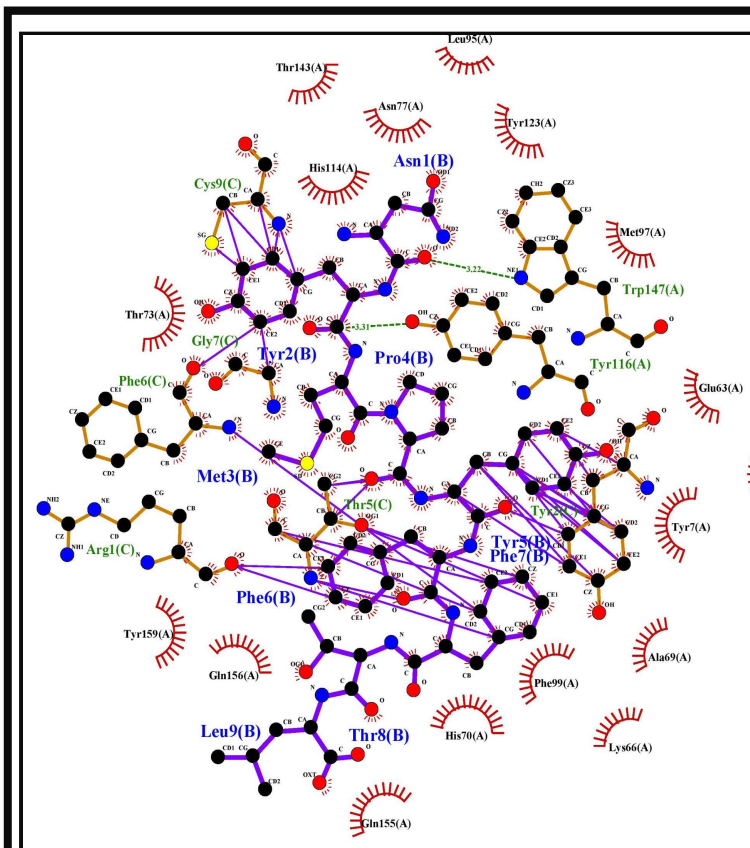

a

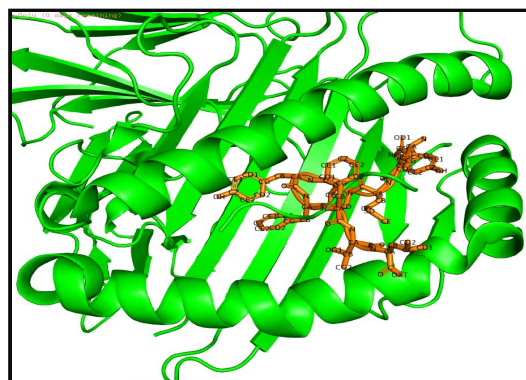

b

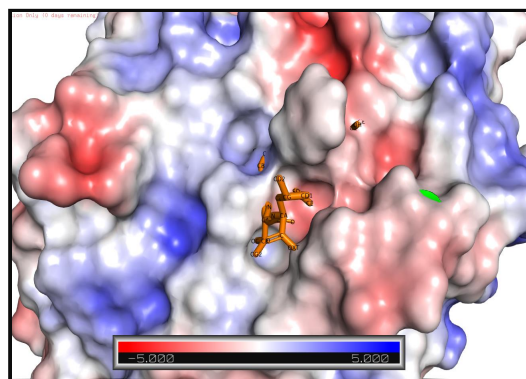

c

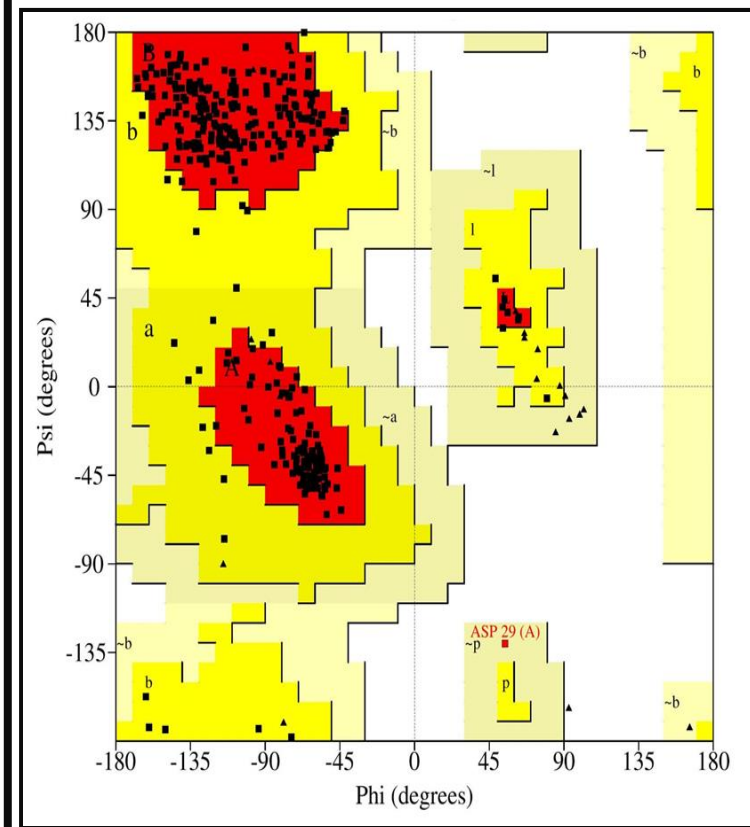

d

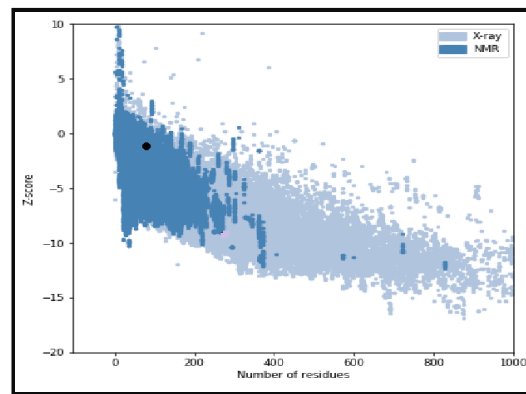

e

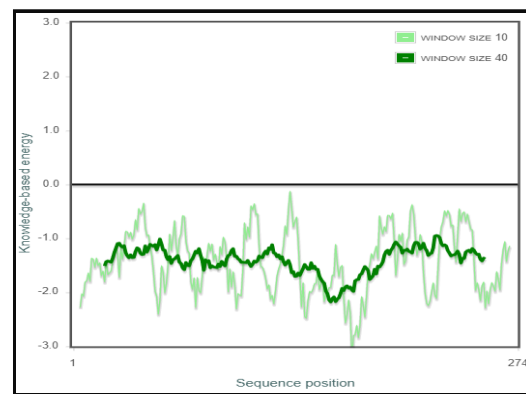

f

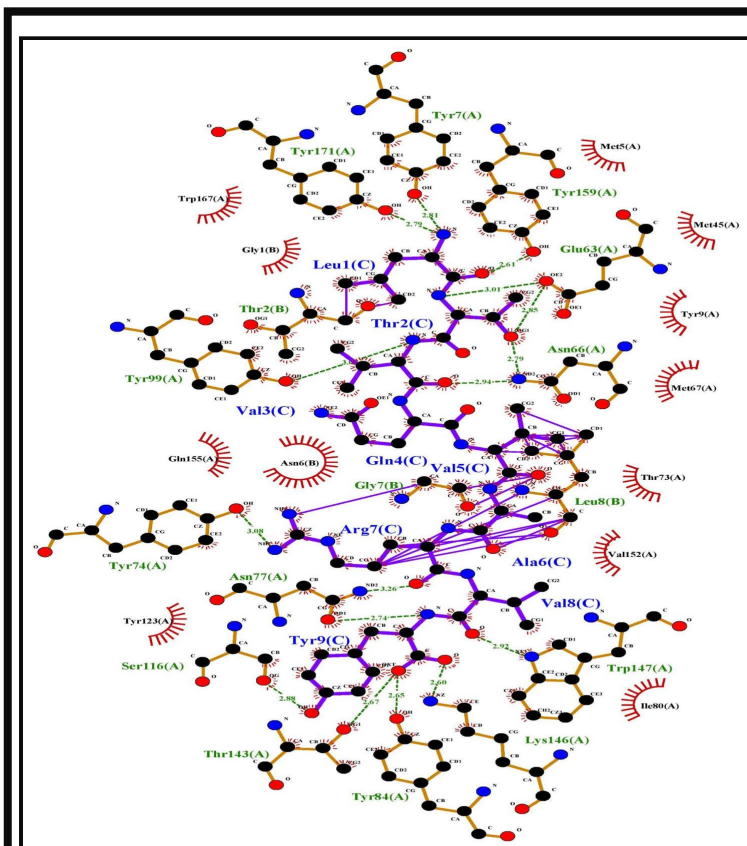

a

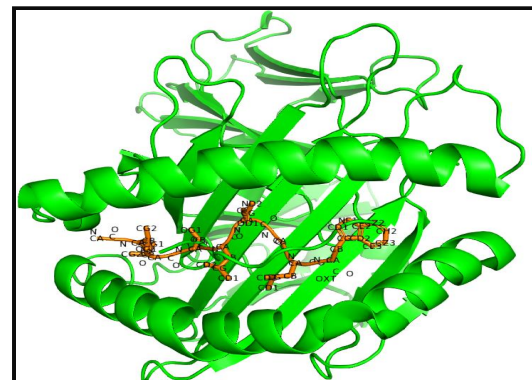

b

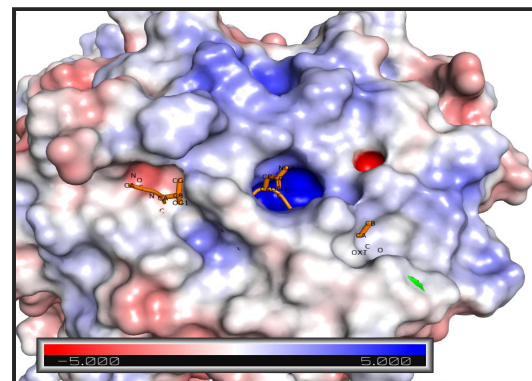

c

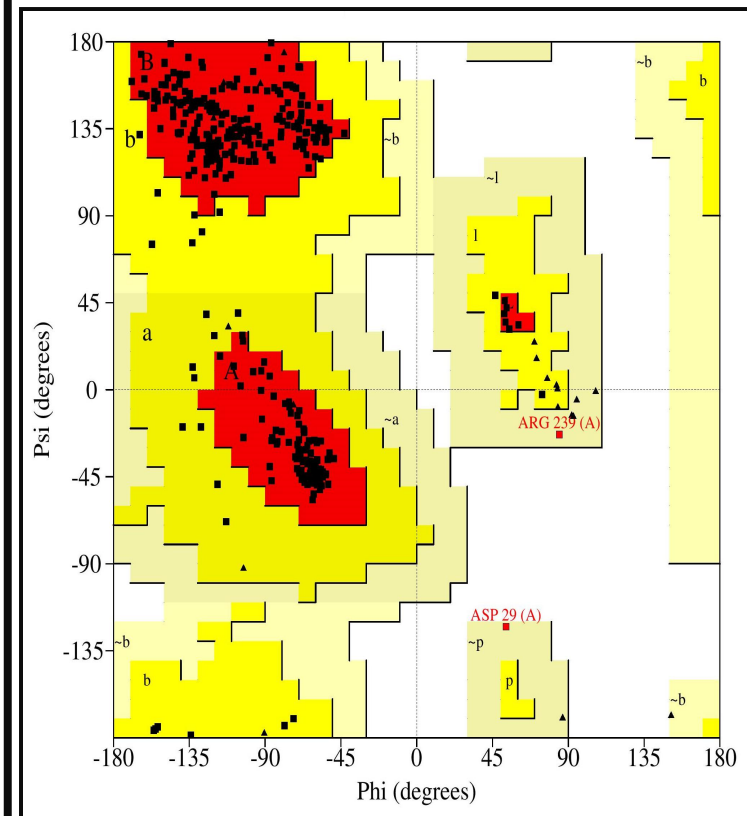

d

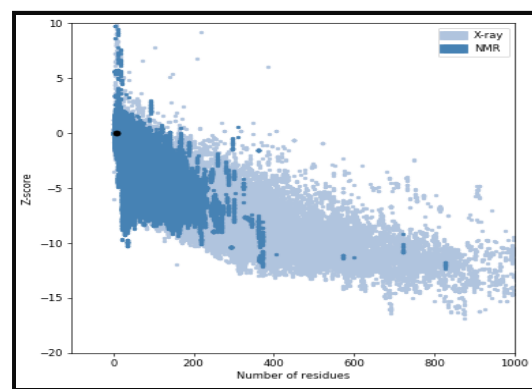

e

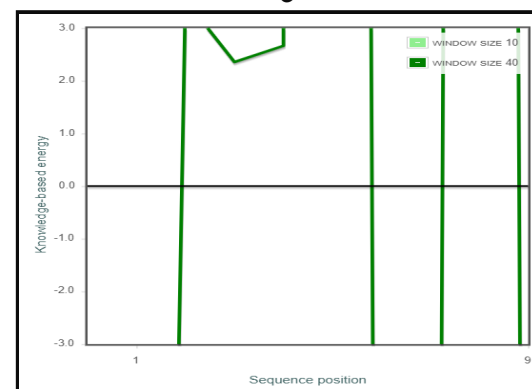

f



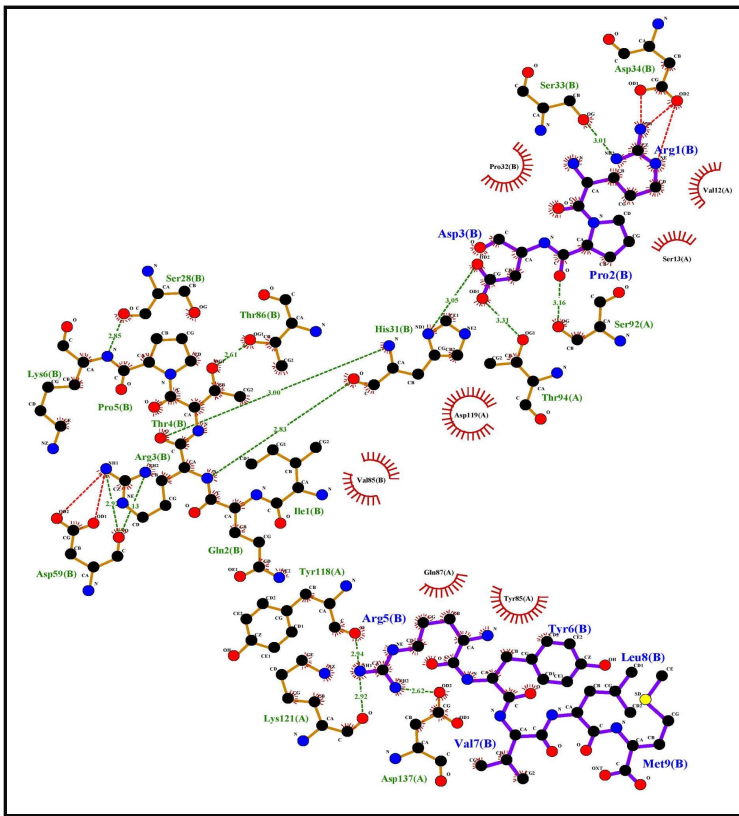

a

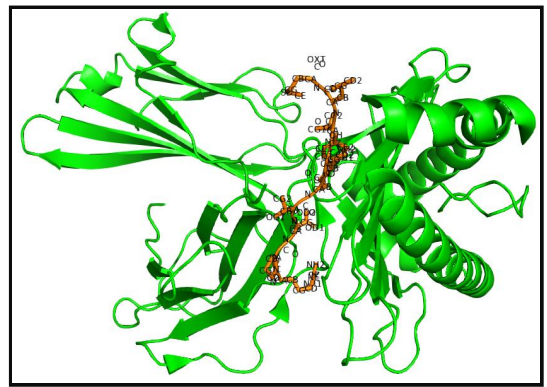

b

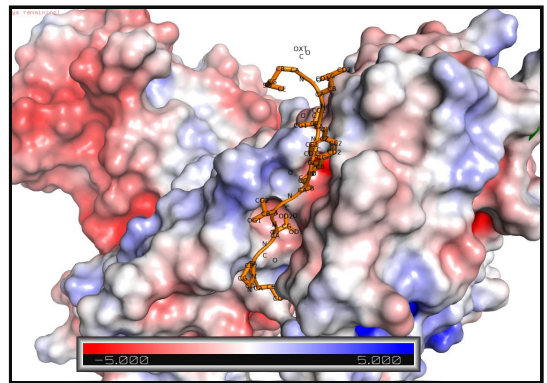

c

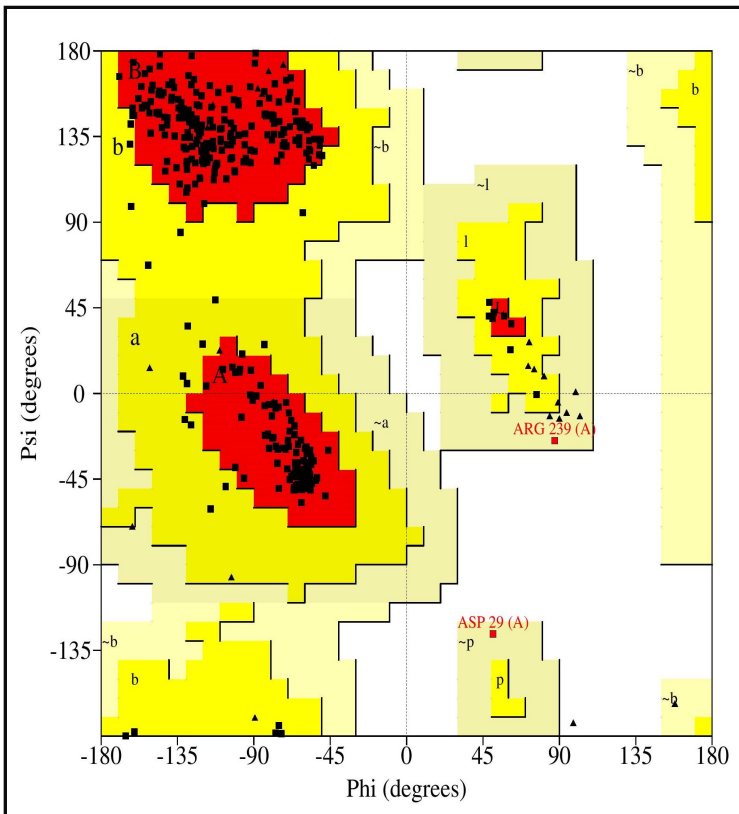

d

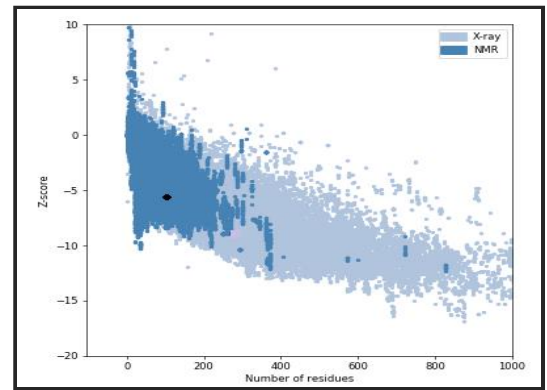

e

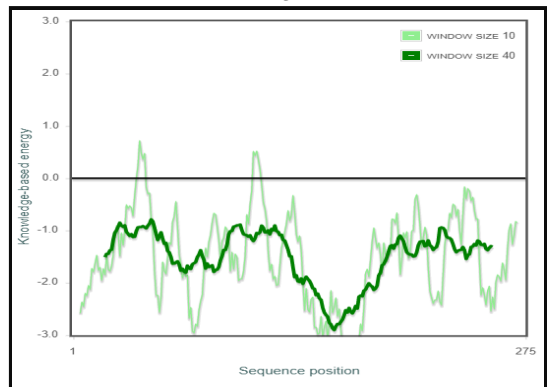

f

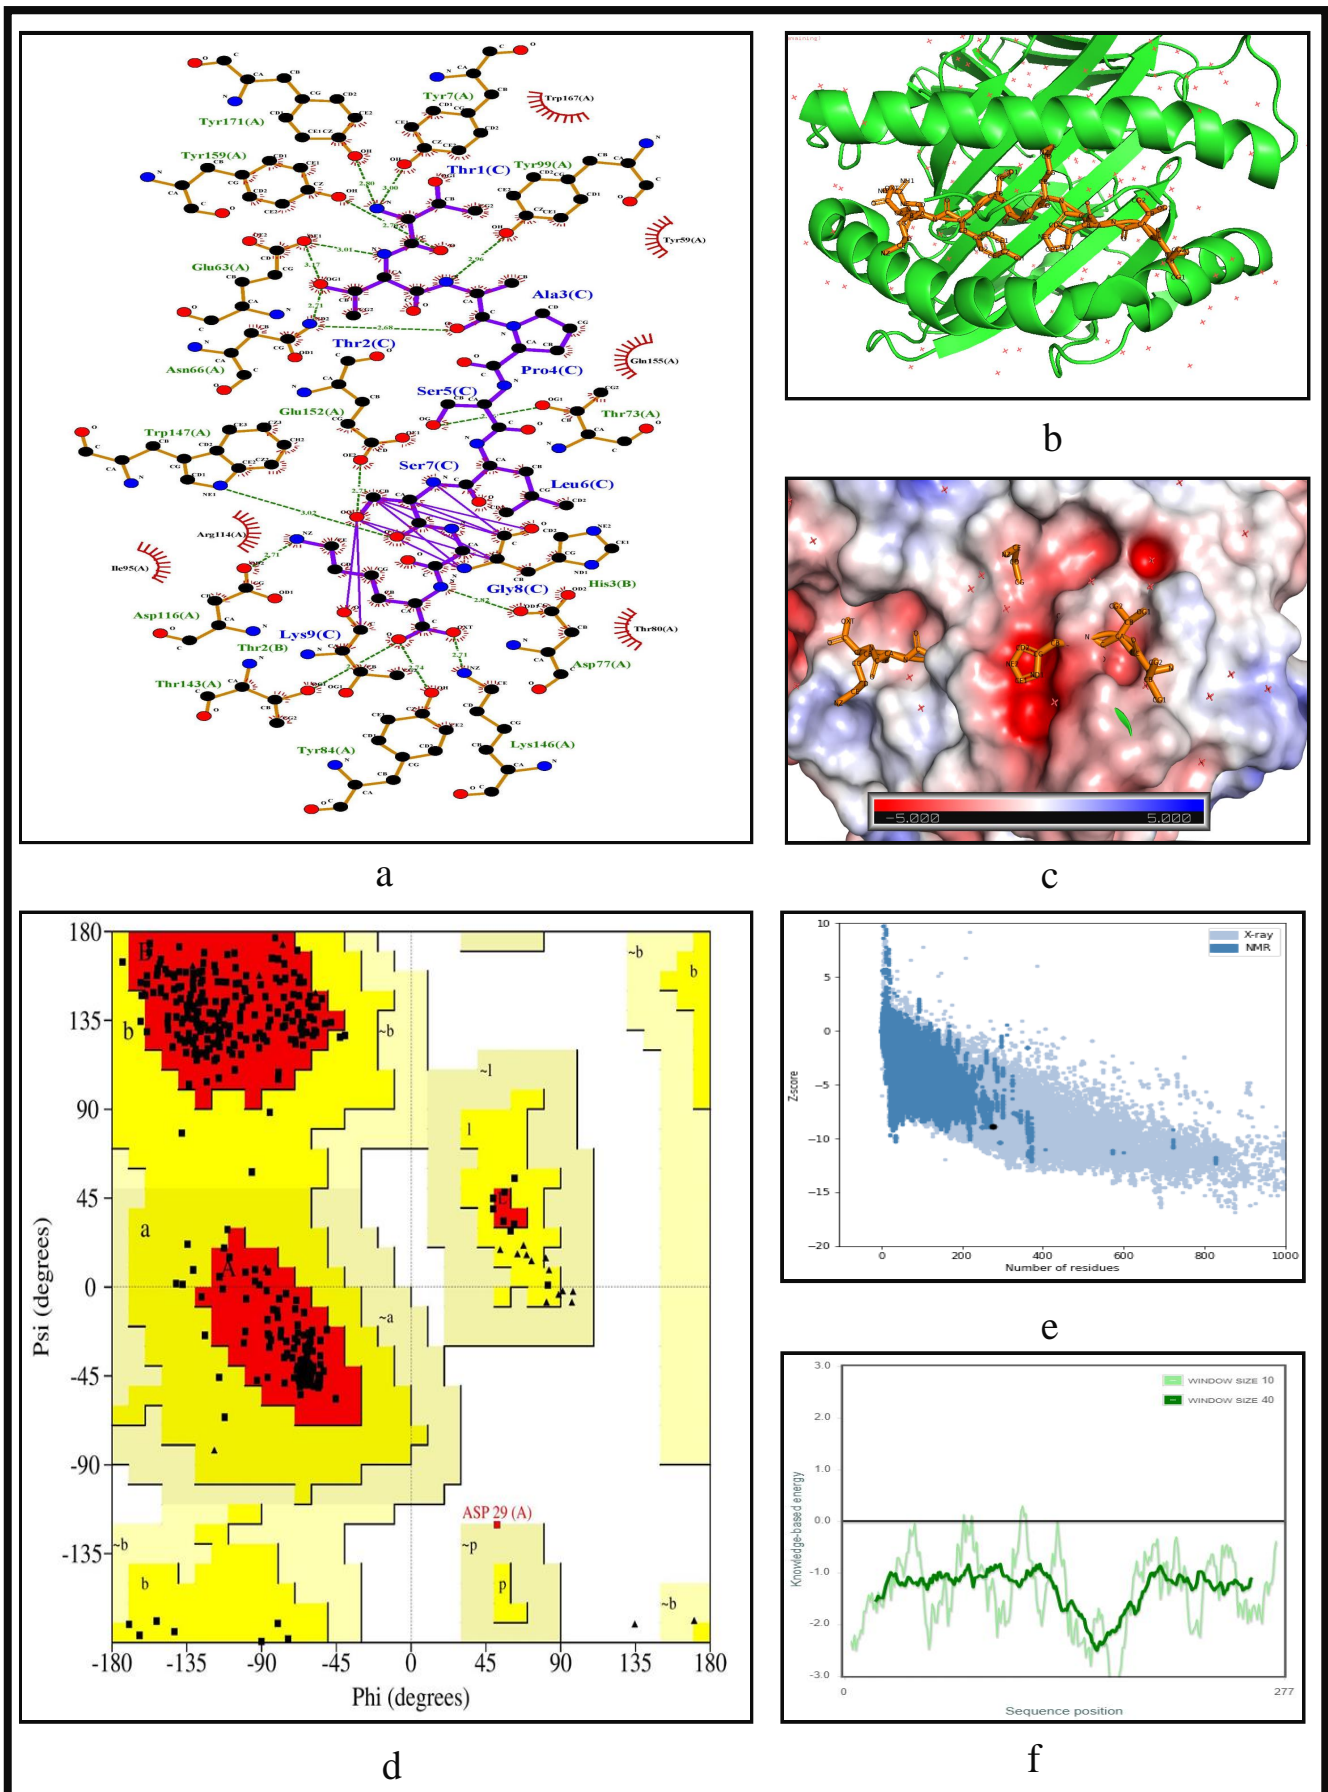

(X)

Figure S3: Structure analysis of the obtained MHC-I restricted T-cell epitope for immunogenic and antigenic in all Consensus Conserved Regions of SARS-CoV-2 genome (a) 2D pose representation between the epitope and HLA allele showing the different non-covalent bonds (b) Docking structure of MHC-I restricted T-cell epitope (c) The surface interaction between the allele and epitopes showing the fitting sites in binding grooves (d) Ramachandran plot of the epitope allele structure showing lower energy sites of the residues in different frame (e) Z-score plot and (f) all residue energy for (I) GSVGFNIDY immunogenic peptide of 3CL-Proteinase bound to HLA-A\*30:02 (II) DLKGKYVQI peptide of NSP10 bound to HLA-B\*08:01 (III) VSFLAHIQW peptide of NS4 bound to HLA-B\*57:01 (IV) HADQLTPTW peptide of Spike glycoprotein bound to HLA-B\*58:01 (V) NVLEGSVAY peptide of NSP4 bound to HLA-B\*35:01 (VI) SGKPVPCY peptide of NSP4 bound to HLA-A\*30:02 (VII) NYMPYFFTL peptide of NSP3 bound to HLA-A\*24:02 (VIII) GTTTLNGLW peptide of 3CL-Proteinase bound to HLA-B\*57:01 (IX) RPDTRYVLM peptide of NSP4 bound to HLA-B\*07:02 (X) VTHSKGLYRK peptide of NSP4 bound to HLA-A\*03:01



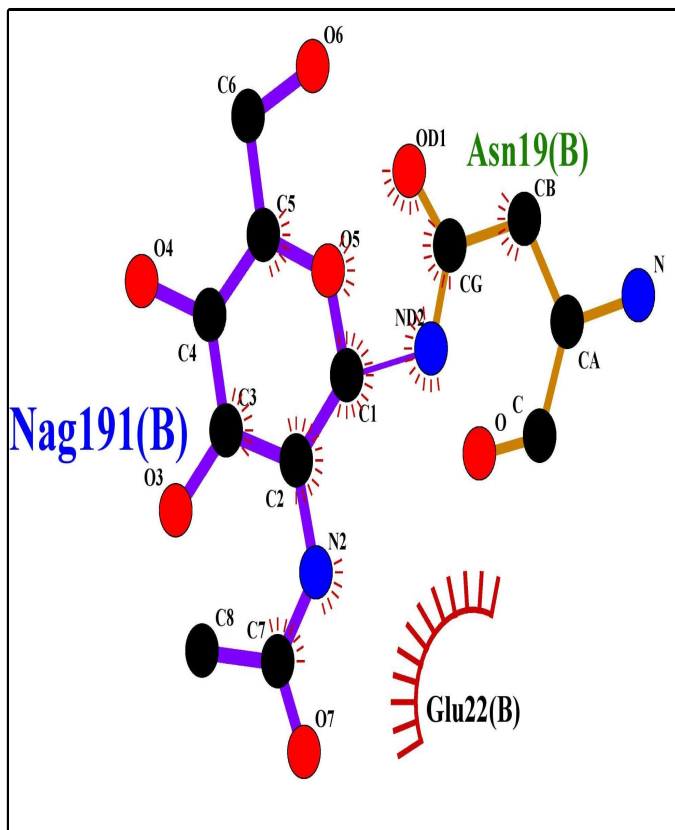

a

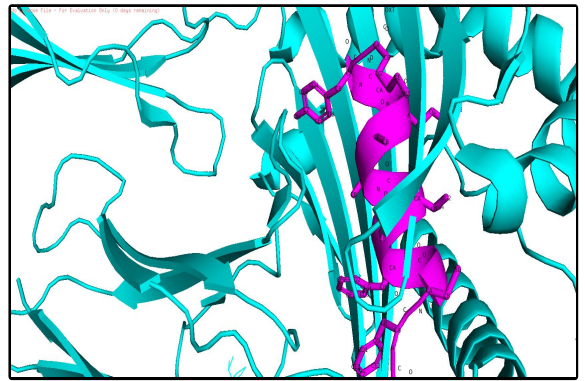

b

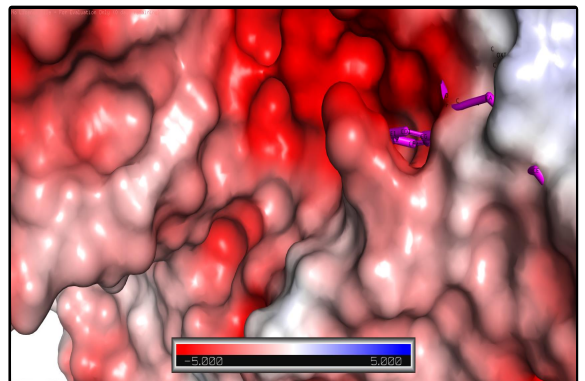

c

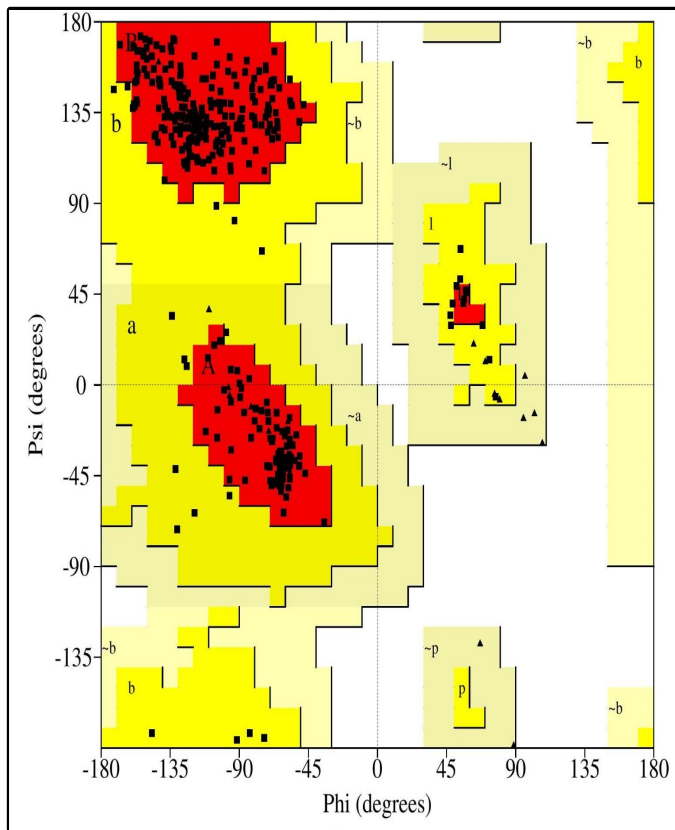

d

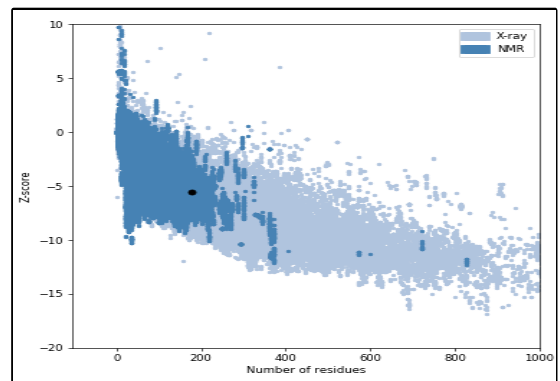

e

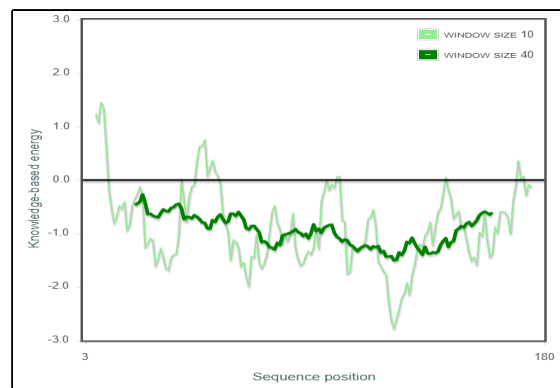

f

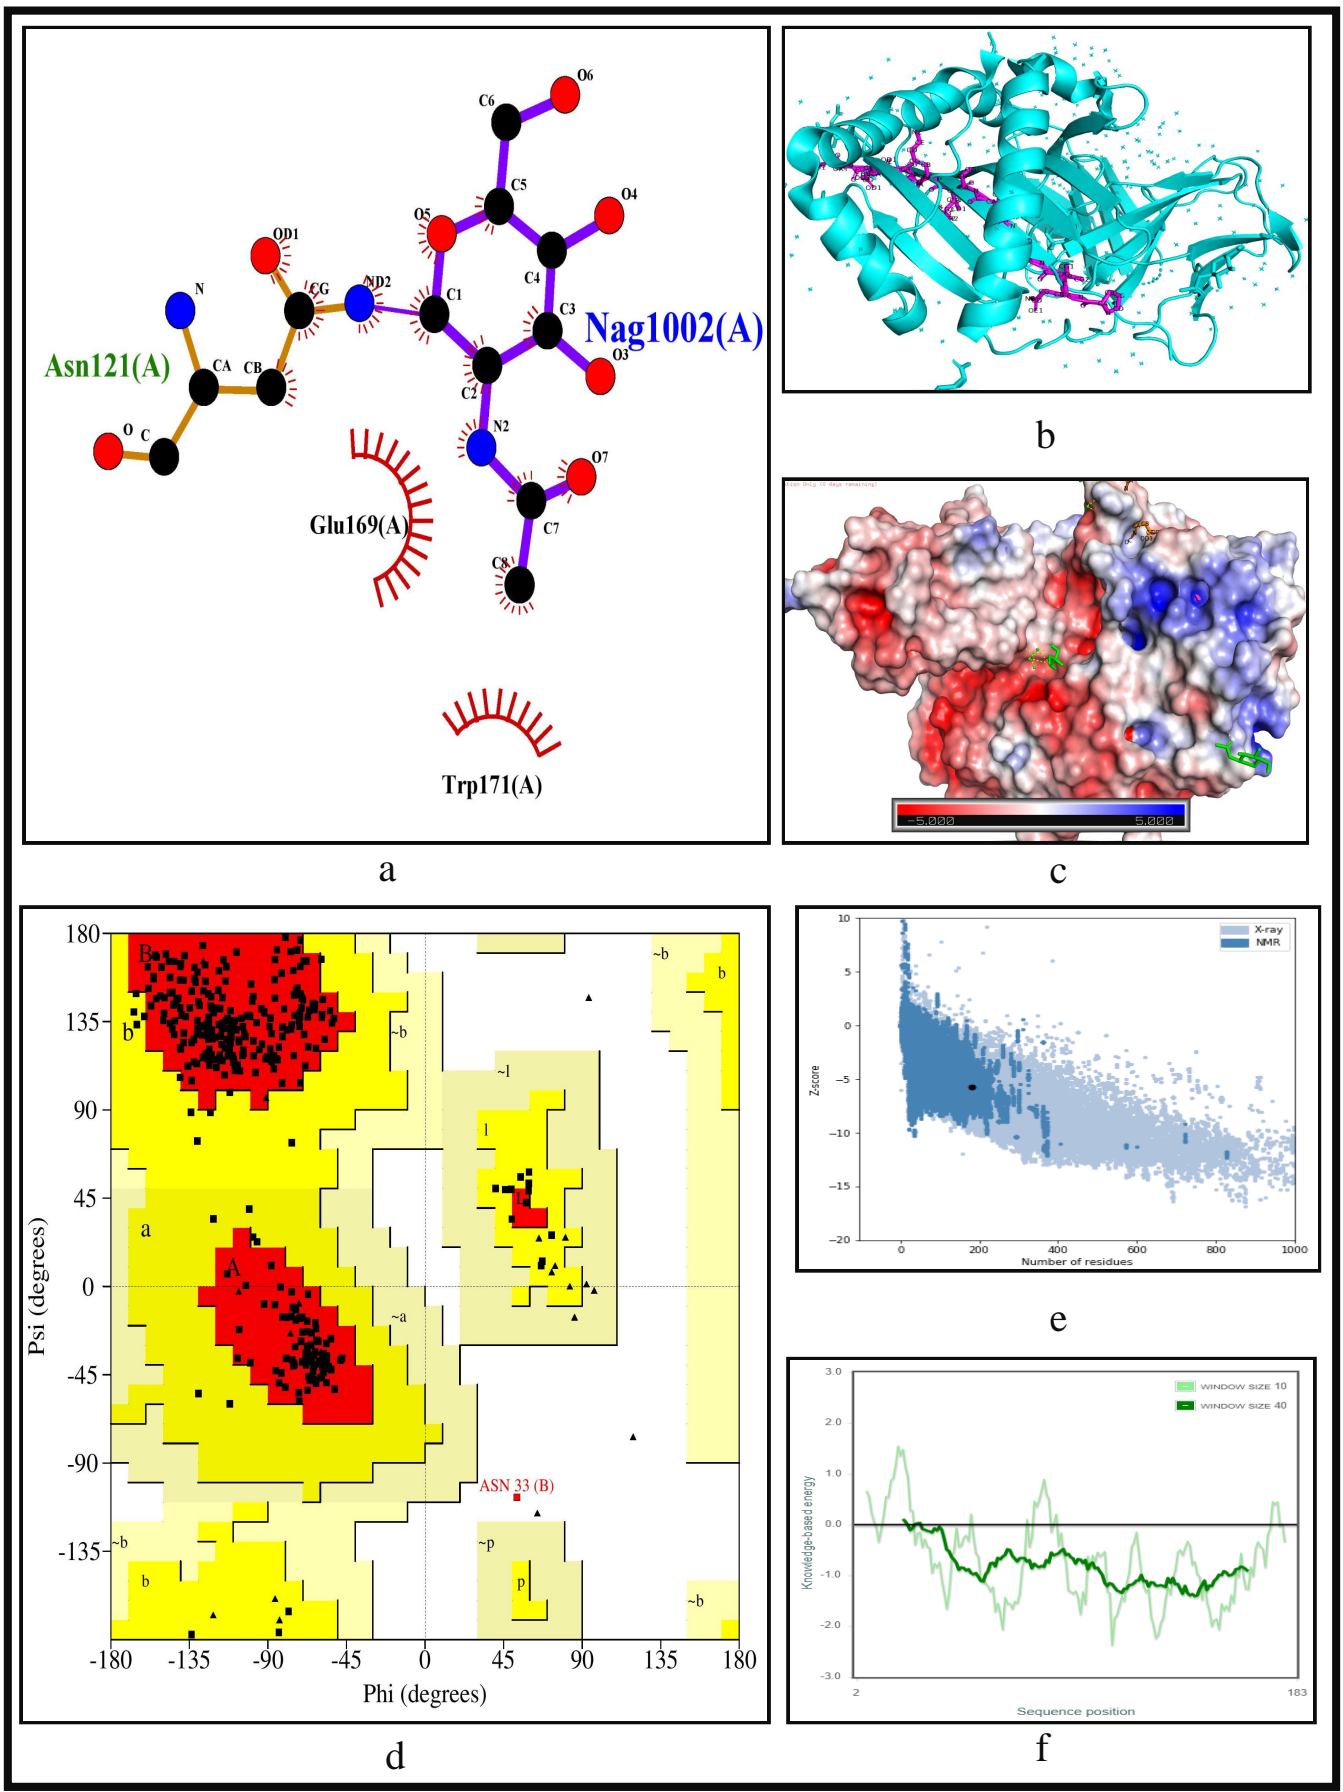

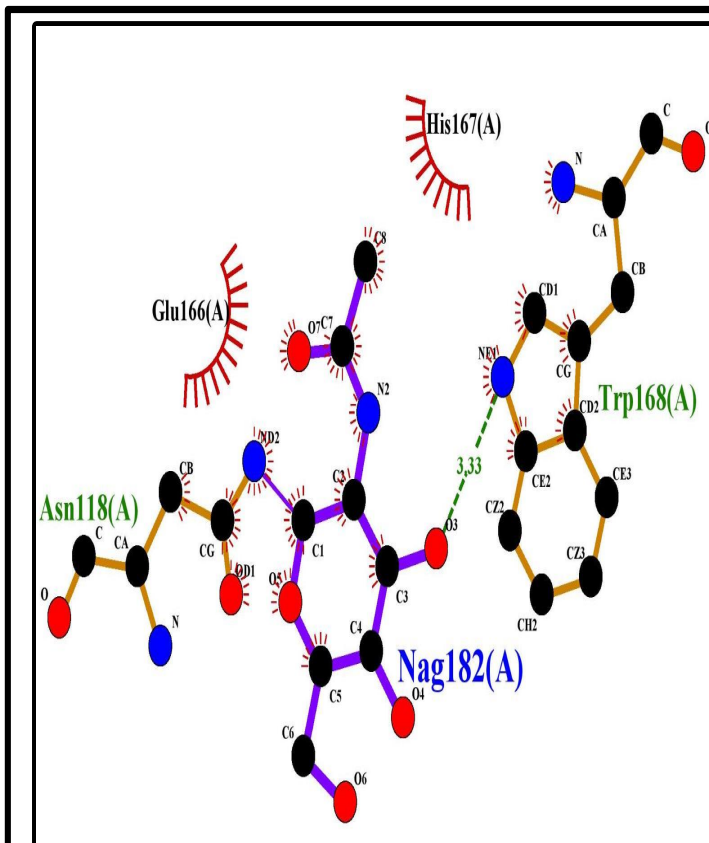

a

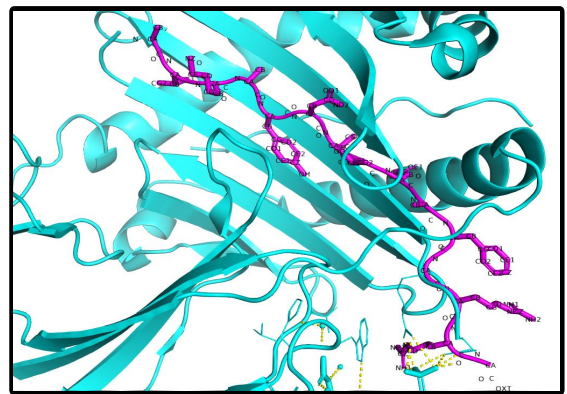

b

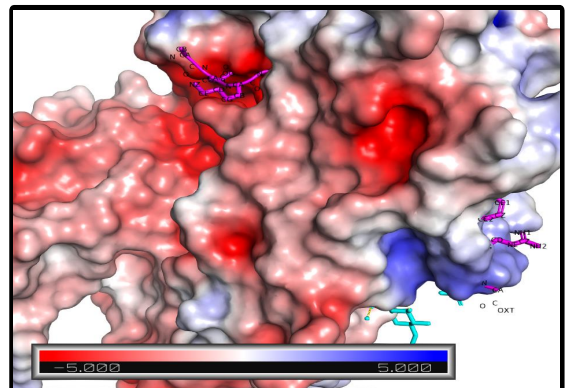

c

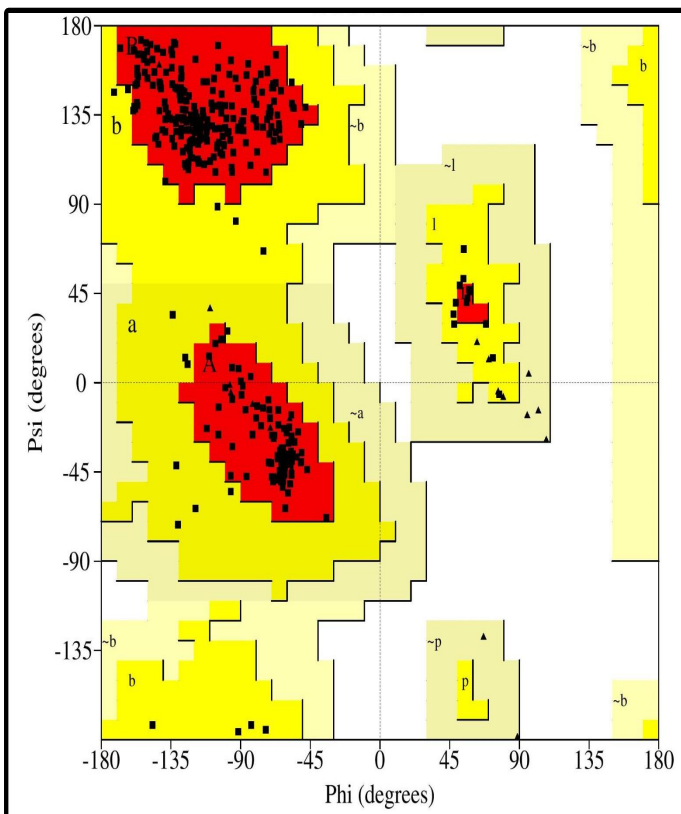

d

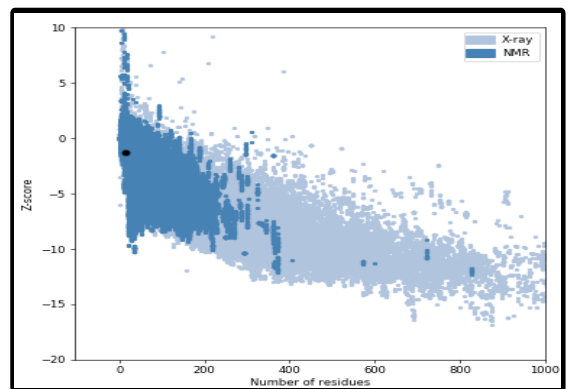

e

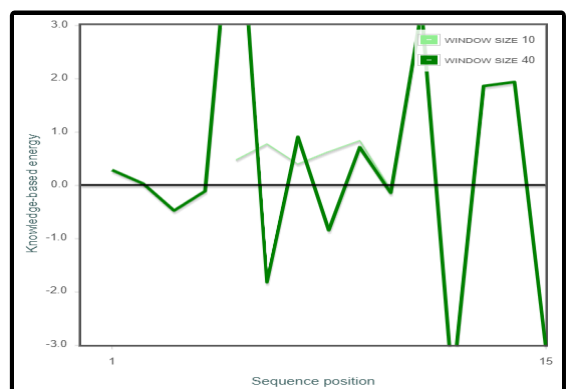

f



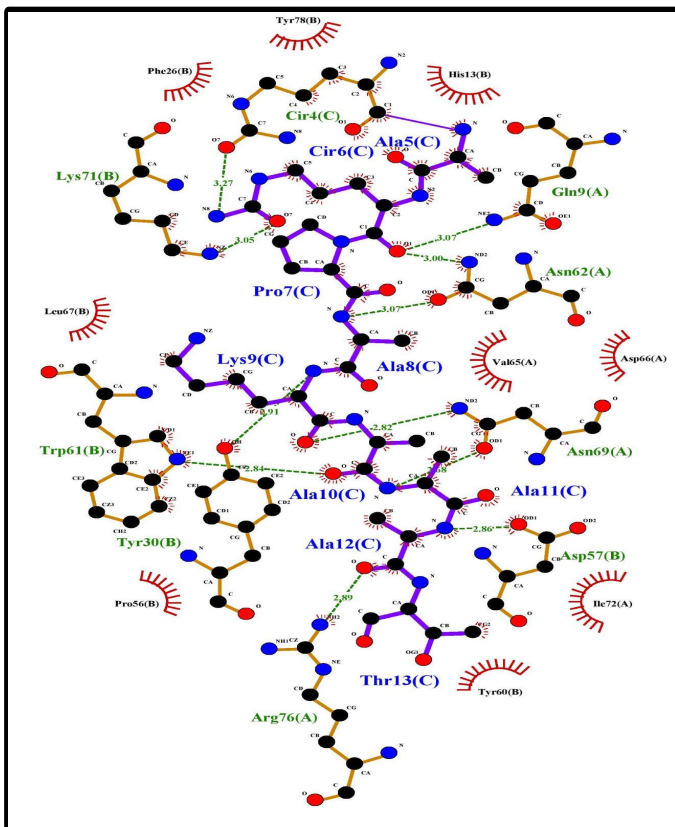

a

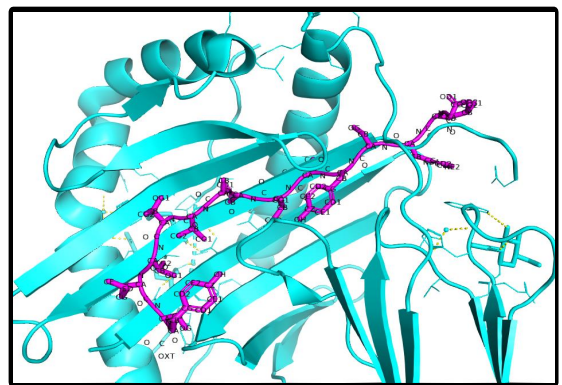

b

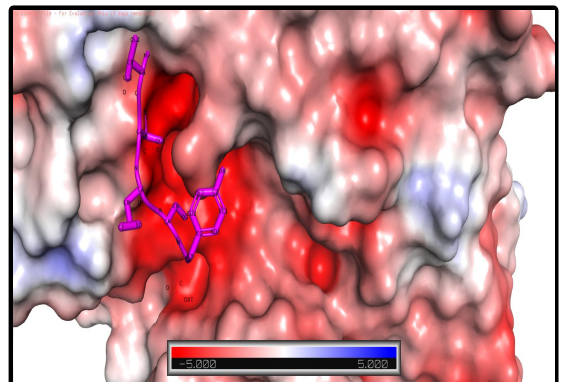

c

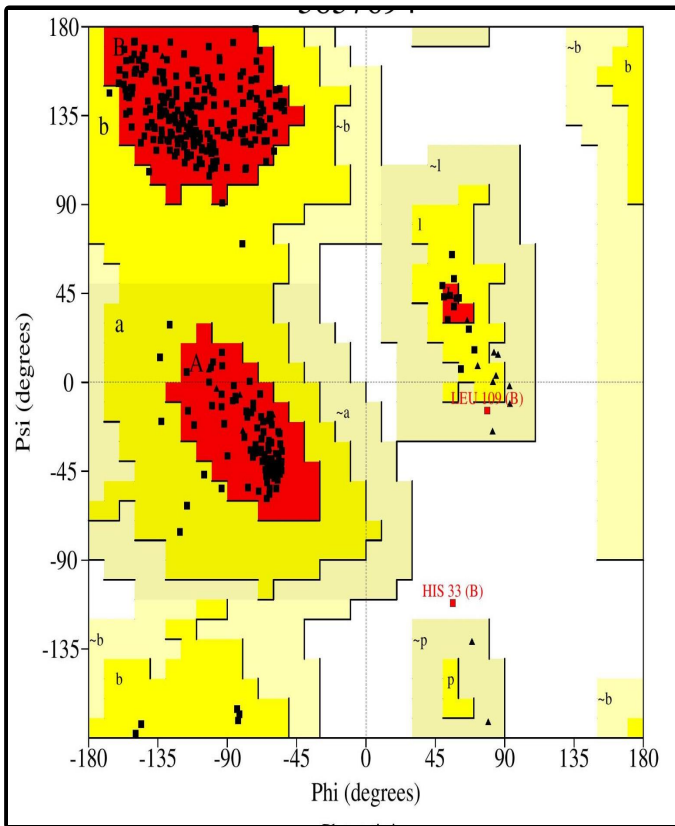

d

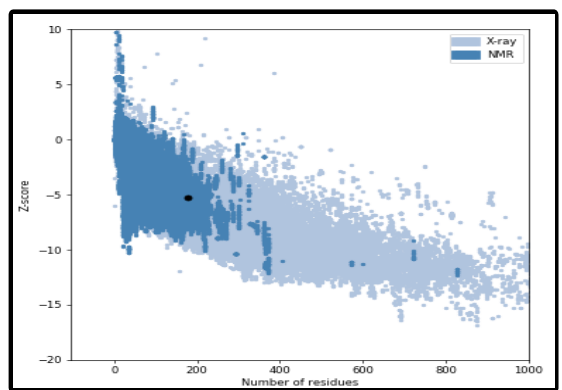

e

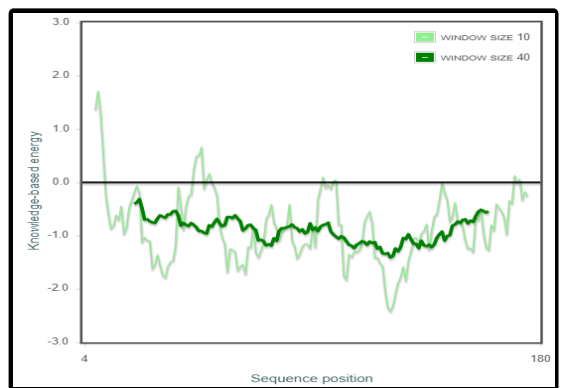

f

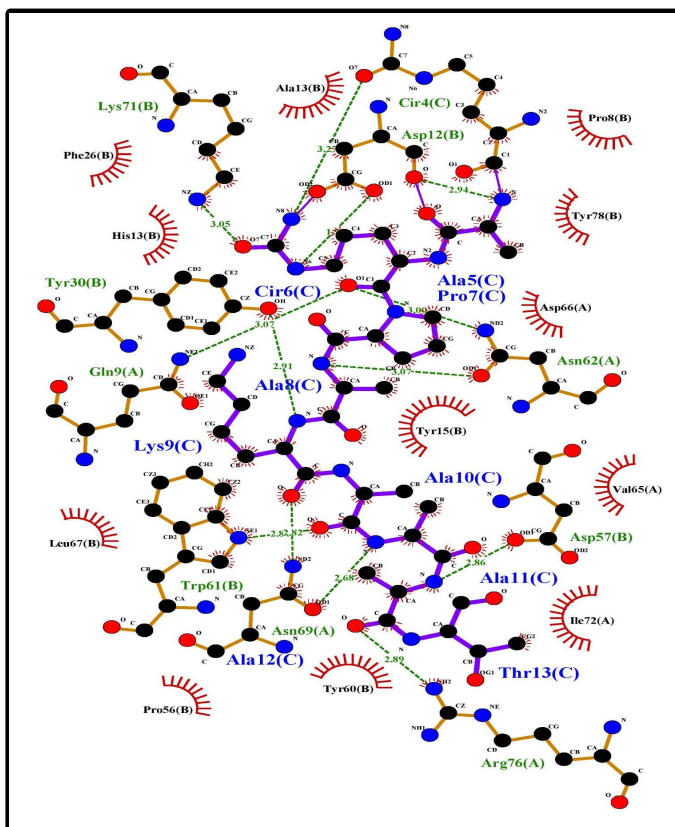

a

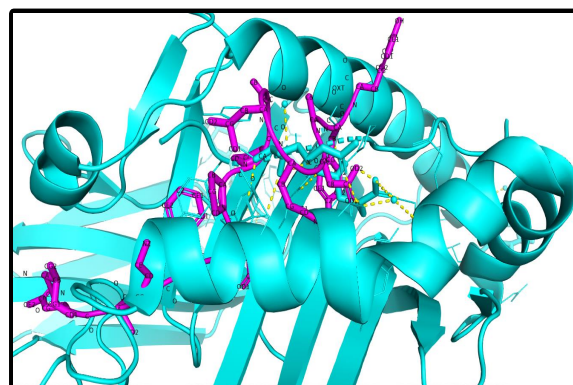

b

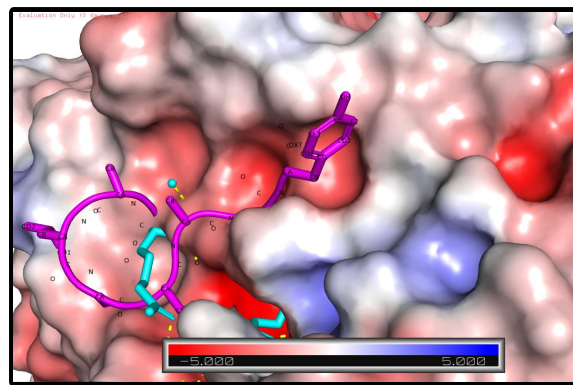

c

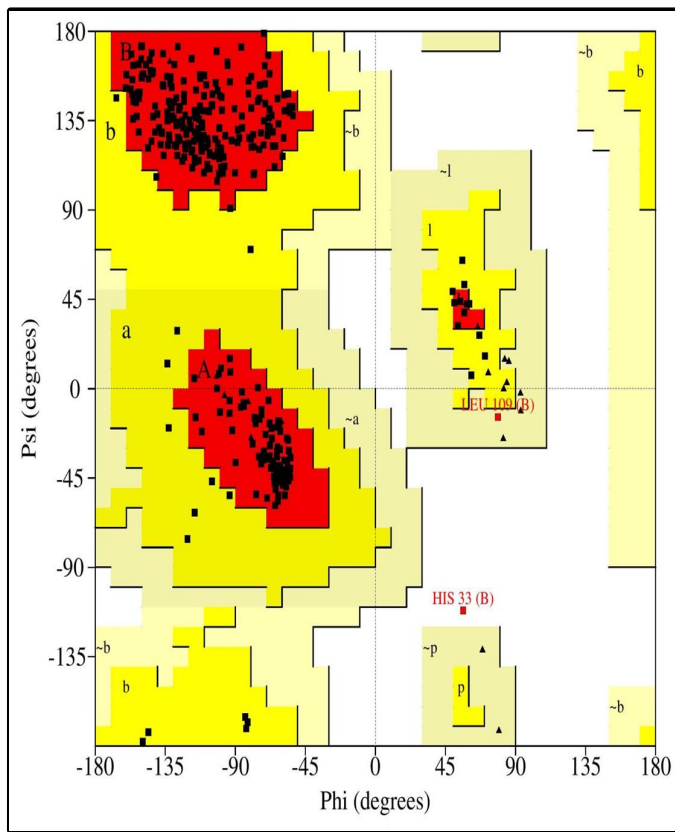

d

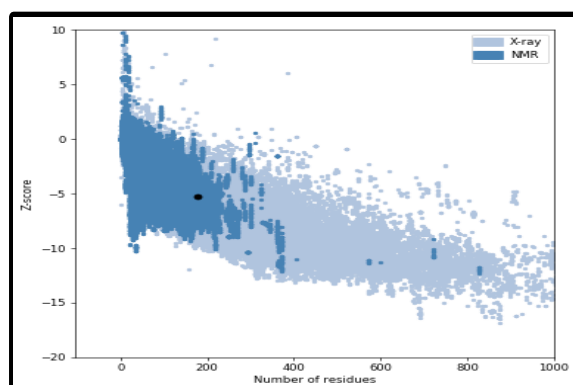

e

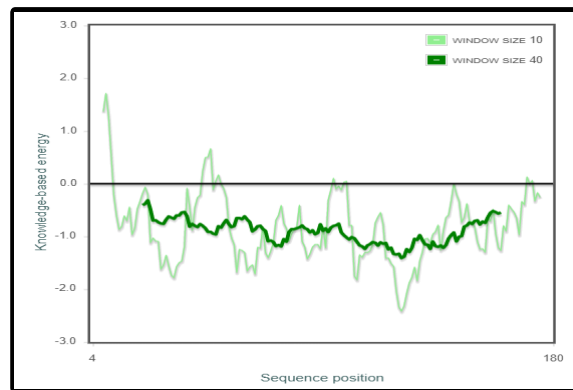

f

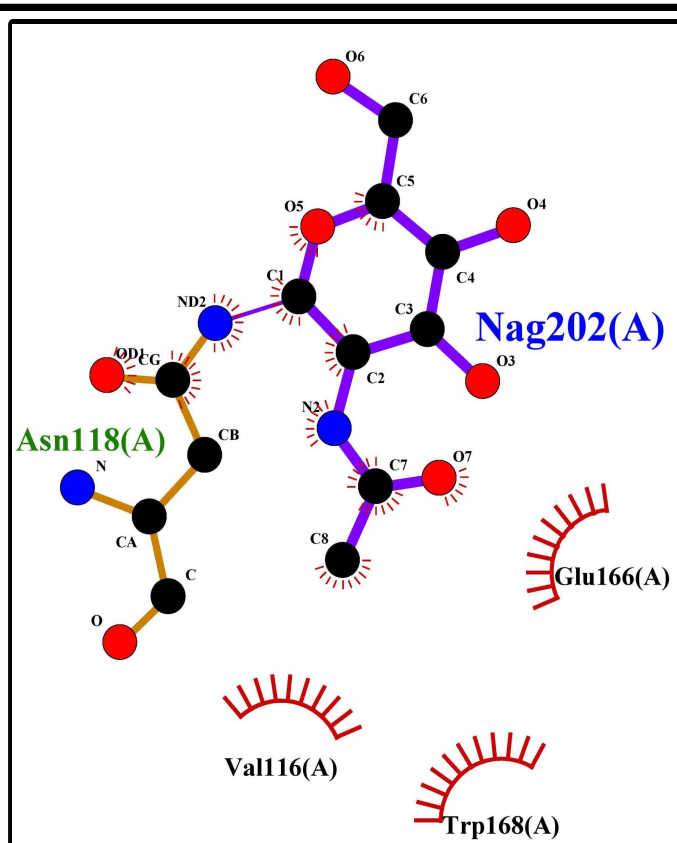

a

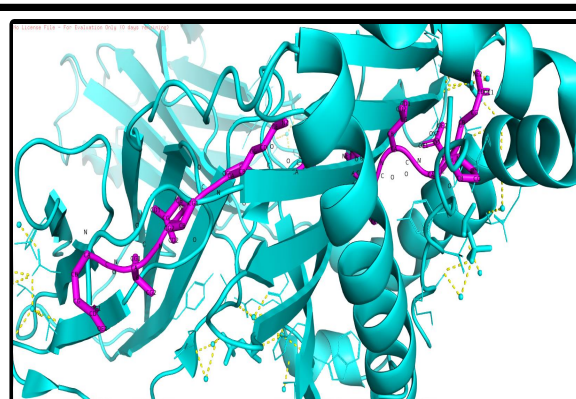

b

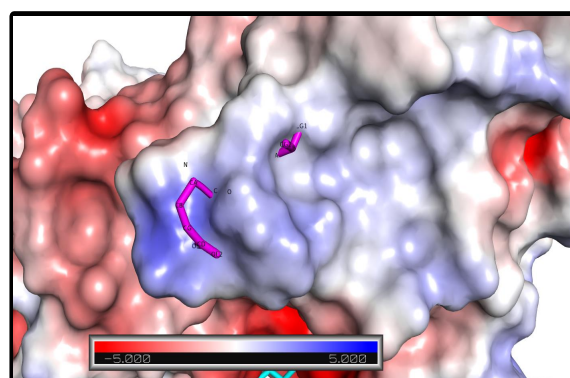

c

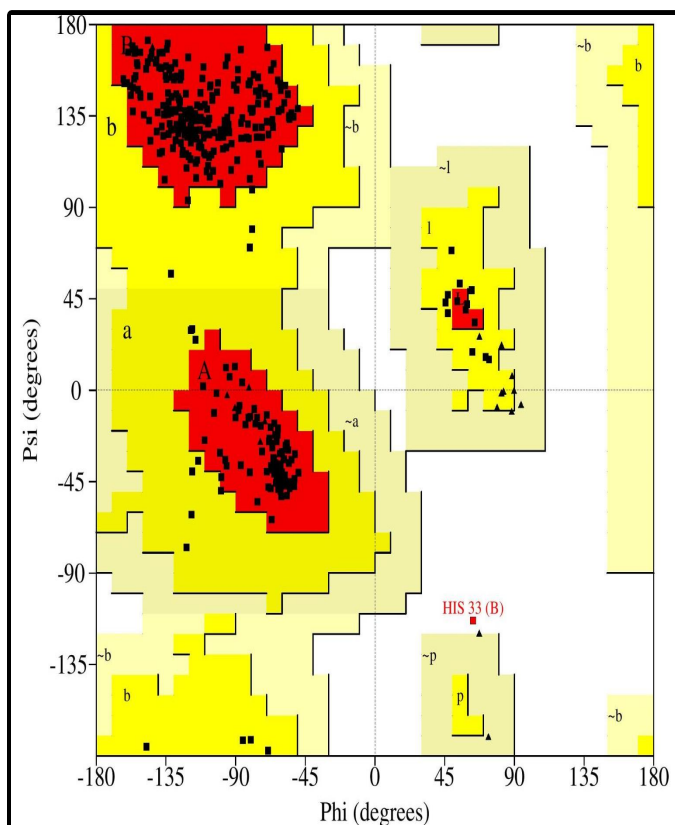

d

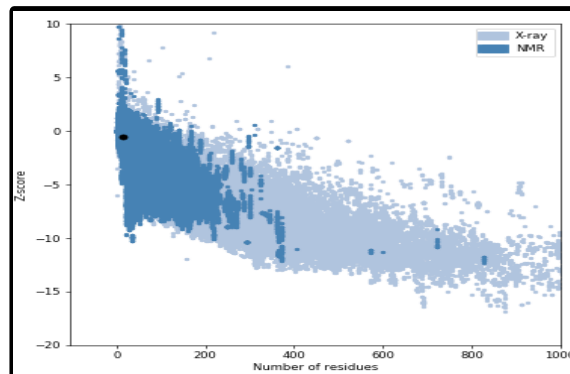

e

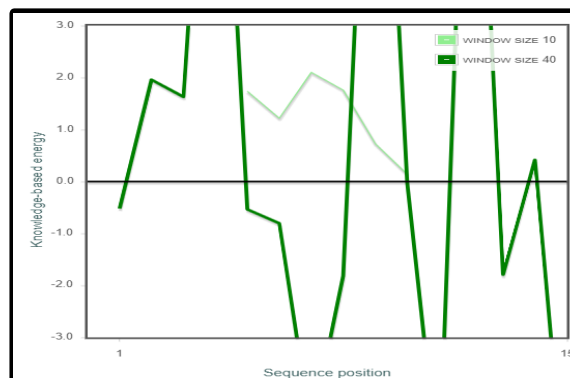

f



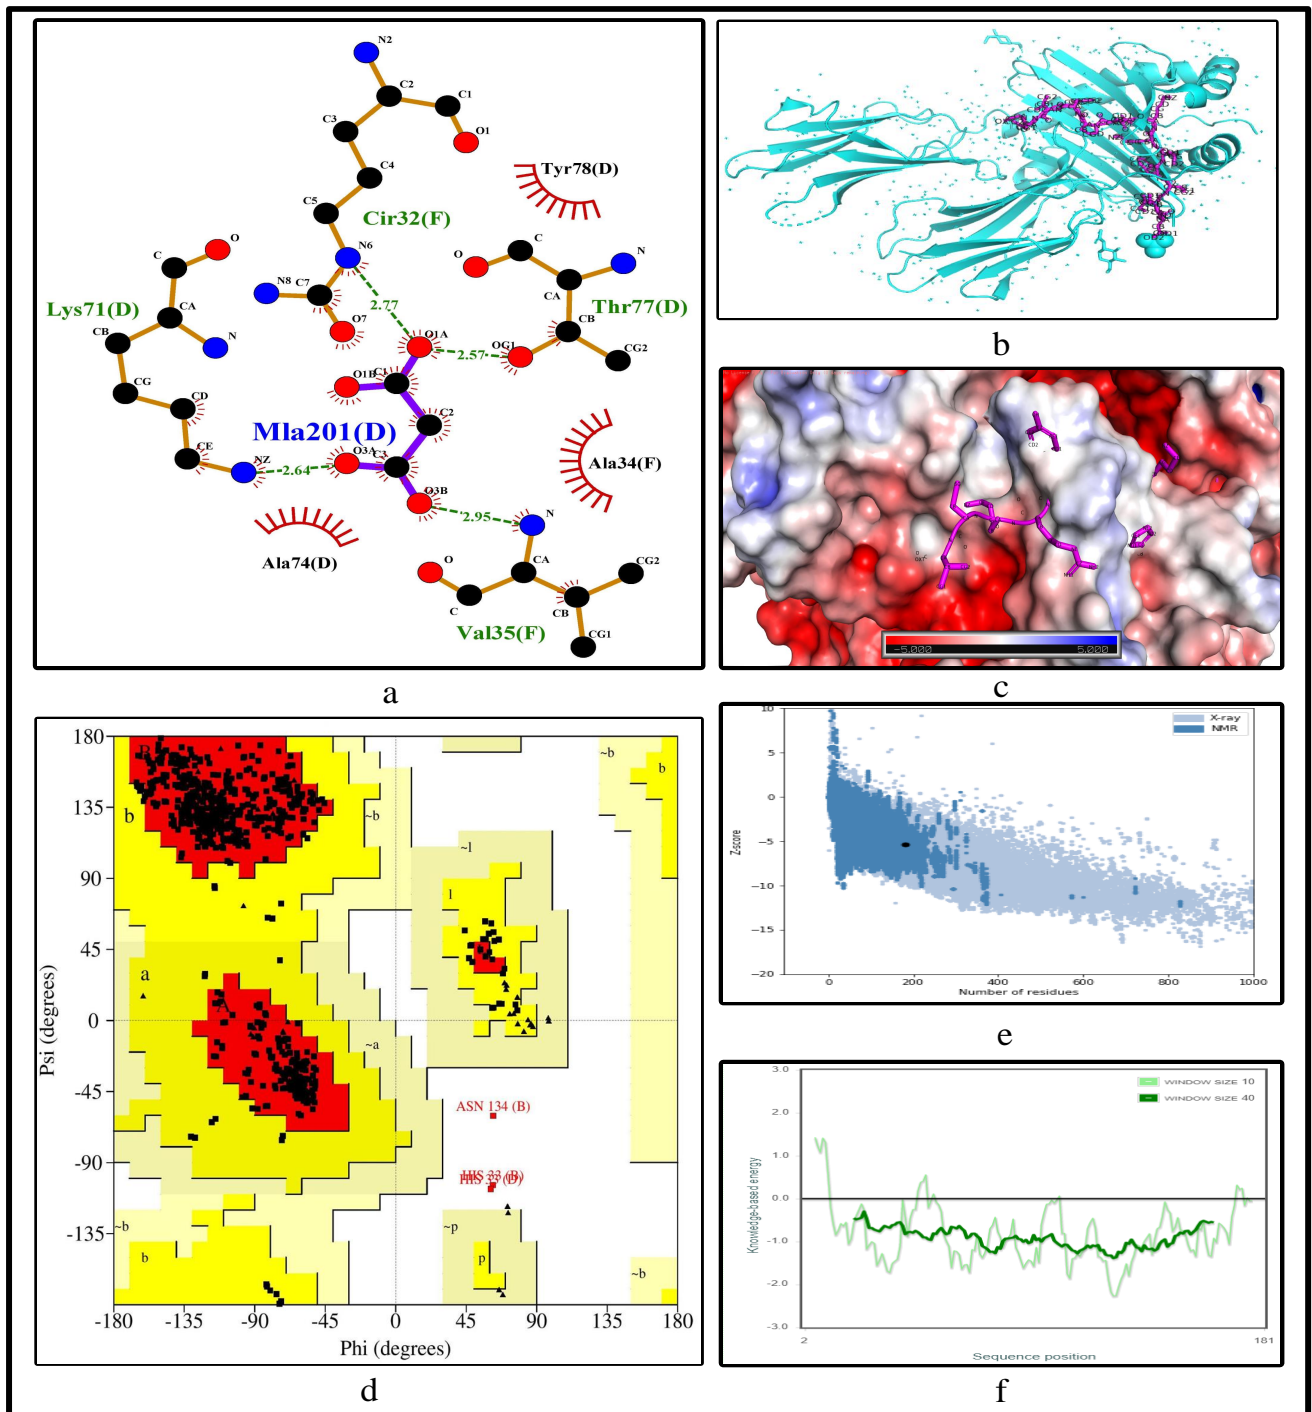

(VII)

Figure S4: SStructure analysis of the obtained MHC-II restricted T-cell epitope for immunogenic and antigenic in all Consensus Conserved Regions of SARS-CoV-2 genome (a) 2D pose representation between the epitope and HLA allele showing the different non-covalent bonds (b) Docking structure of MHC-II restricted T-cell epitope (c) The surface interaction between the allele and epitopes showing the fitting sites in binding grooves (d) Ramachandran plot of the epitope allele structure showing lower energy sites of the residues in different frame (e) Z-score plot and (f) all residue energy for for (I) SVIYLYLTFYLTNDV immunogenic peptide of NSP5 bound to HLA-DPA1\*01:03/DPB1\*02:01 (II) GVYSVIYLYLTFYLT antigenic peptide of NSP5 bound to HLA-DPA1\*01:03/DPB1\*02:01 (III) PQVNGLTSIKWADNN immunogenic as well as Antigenic peptide of NSP3 bound to HLA-DQA1\*01:02/DQB1\*06:02 (IV) IELKFNPPALQDAYY immunogenic as well as Antigenic peptide of NSP3 bound to HLA-DRB3\*02:02 (V) PVPYCYDTNVLEGSV immunogenic peptide of NSP4 bound to HLA-DRB1\*04:01 (VI) GKPVPYCYDTNV-LEG immunogenic as well as antigenic peptide of NSP10 bound to HLA-DRB1\*04:01 (VII) LMDGSIIQFPNTYLE immunogenic as well as Antigenic peptide of NSP4 bound to HLA-DRB1\*15:01
